# Supplementary material for: Support for mobilising medical students to join the COVID-19 pandemic emergency healthcare workforce: a cross-sectional questionnaire survey
Source: PubMed Central journal article supplement — BMJ Open. 2020 Sep 16;10(9):e039082. doi: 10.1136/bmjopen-2020-039082 (PMC7496568; doi:10.1136/bmjopen-2020-039082), 2020-09-16
Supplement: bmjopen-2020-039082.draft_revisions.pdf [file bmjopen-2020-039082.draft_revisions.pdf]

# BMJ Open

BMJ Open is committed to open peer review. As part of this commitment we make the peer review history of every article we publish publicly available.

When an article is published we post the peer reviewers' comments and the authors' responses online. We also post the versions of the paper that were used during peer review. These are the versions that the peer review comments apply to.

The versions of the paper that follow are the versions that were submitted during the peer review process. They are not the versions of record or the final published versions. They should not be cited or distributed as the published version of this manuscript.

BMJ Open is an open access journal and the full, final, typeset and author-corrected version of record of the manuscript is available on our site with no access controls, subscription charges or pay-per-view fees (<http://bmjopen.bmj.com>).

If you have any questions on BMJ Open's open peer review process please email [info.bmjopen@bmj.com](mailto:info.bmjopen@bmj.com)

# BMJ Open

## Support for mobilizing medical students to join the SARS-CoV-2 pandemic emergency healthcare workforce – a cross-sectional questionnaire survey

|                               |                                                                                                                                                                                                                                                                                                                                                                                                                                                                                                 |
|-------------------------------|-------------------------------------------------------------------------------------------------------------------------------------------------------------------------------------------------------------------------------------------------------------------------------------------------------------------------------------------------------------------------------------------------------------------------------------------------------------------------------------------------|
| Journal:                      | <i>BMJ Open</i>                                                                                                                                                                                                                                                                                                                                                                                                                                                                                 |
| Manuscript ID                 | bmjopen-2020-039082                                                                                                                                                                                                                                                                                                                                                                                                                                                                             |
| Article Type:                 | Original research                                                                                                                                                                                                                                                                                                                                                                                                                                                                               |
| Date Submitted by the Author: | 03-Apr-2020                                                                                                                                                                                                                                                                                                                                                                                                                                                                                     |
| Complete List of Authors:     | Astorp, Mike; Aalborg University Hospital, Department of Geriatric Medicine<br>Sørensen, Gustav; Aalborg University Hospital, Department of Geriatric Medicine<br>Rasmussen, Sten; Aalborg University Hospital, Orthopaedic Surgery Research Unit<br>Emmersen, Jeppe; Aalborg University Faculty of Medicine<br>Erbs, Alexander; Aalborg University Faculty of Medicine<br>Andersen, Stig; Aalborg Universitet, Clinical Medicine; Aalborg University Hospital, Geriatric and Internal Medicine |
| Keywords:                     | MEDICAL EDUCATION & TRAINING, Health policy < HEALTH SERVICES ADMINISTRATION & MANAGEMENT, HEALTH SERVICES ADMINISTRATION & MANAGEMENT                                                                                                                                                                                                                                                                                                                                                          |
|                               |                                                                                                                                                                                                                                                                                                                                                                                                                                                                                                 |

SCHOLARONE™  
Manuscripts

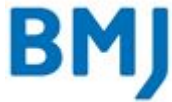

I, the Submitting Author has the right to grant and does grant on behalf of all authors of the Work (as defined in the below author licence), an exclusive licence and/or a non-exclusive licence for contributions from authors who are: i) UK Crown employees; ii) where BMJ has agreed a CC-BY licence shall apply, and/or iii) in accordance with the terms applicable for US Federal Government officers or employees acting as part of their official duties; on a worldwide, perpetual, irrevocable, royalty-free basis to BMJ Publishing Group Ltd ("BMJ") its licensees and where the relevant Journal is co-owned by BMJ to the co-owners of the Journal, to publish the Work in this journal and any other BMJ products and to exploit all rights, as set out in our [licence](#).

The Submitting Author accepts and understands that any supply made under these terms is made by BMJ to the Submitting Author unless you are acting as an employee on behalf of your employer or a postgraduate student of an affiliated institution which is paying any applicable article publishing charge ("APC") for Open Access articles. Where the Submitting Author wishes to make the Work available on an Open Access basis (and intends to pay the relevant APC), the terms of reuse of such Open Access shall be governed by a Creative Commons licence – details of these licences and which [Creative Commons](#) licence will apply to this Work are set out in our licence referred to above.

Other than as permitted in any relevant BMJ Author's Self Archiving Policies, I confirm this Work has not been accepted for publication elsewhere, is not being considered for publication elsewhere and does not duplicate material already published. I confirm all authors consent to publication of this Work and authorise the granting of this licence.

1  
2  
3  
4  
5  
6 Support for mobilizing medical students to join the SARS-CoV-2  
7  
8 pandemic emergency healthcare workforce – a cross-sectional  
9  
10 questionnaire survey  
11  
12  
13  
14  
15

16 **Mike S Astorp<sup>1,2</sup> (0000-0003-4062-6027), Gustav V B Sørensen<sup>1,2</sup> (0000-0002-7944-9913), Sten**  
17 **Rasmussen<sup>2,3</sup> (0000-0002-8664-352X), Jeppe Emmersen<sup>4</sup> (0000-0001-6244-1280), Alexander W**  
18 **Erbs<sup>4</sup> (0000-0003-3651-1112), Stig Andersen<sup>1,2</sup> (0000-0003-3632-5213).**  
19  
20  
21  
22  
23  
24

25 1 - Department of Geriatric Medicine, Aalborg University Hospital, 9000 Aalborg, Denmark

26 2 - Department of Clinical Medicine, Aalborg University, 9000 Aalborg, Denmark

27 3 - Department of Orthopaedic Surgery, Aalborg University Hospital, 9000 Aalborg, Denmark

28 4 - Faculty of Medicine, Aalborg University, Niels Jernes Vej 10, 9000 Aalborg, Denmark  
29  
30  
31  
32  
33  
34  
35  
36

37 **Correspondence to:**

38  
39 Mike S Astorp

40  
41 e-mail: [m.astorp@rn.dk](mailto:m.astorp@rn.dk)

42  
43 Department of Clinical Medicine

44  
45 Faculty of Health, Aalborg University

46  
47 Sonder Skovvej 15

48  
49 9000 Aalborg

50  
51 Denmark  
52  
53  
54  
55  
56  
57  
58  
59  
60

1  
2  
3  
4  
5  
6  
7  
8  
9  
10  
11  
12  
13  
14  
15  
16  
17  
18  
19  
20  
21  
22  
23  
24  
25  
26  
27  
28  
29  
30  
31  
32  
33  
34  
35  
36  
37  
38  
39  
40  
41  
42  
43  
44  
45  
46  
47  
48  
49  
50  
51  
52  
53  
54  
55  
56  
57  
58  
59  
60

## Abstract:

**Objective:** Identifying points important for medical students to join the pandemic emergency healthcare workforce.

**Design:** Cross-sectional.

**Setting:** Aalborg University, Denmark.

**Participants:** All medical students.

**Main outcome measures:** Demographic characteristics and 11 motivational points scored on a Visual Analog Scale from 0 (low) to 100 (high) responding to the question: *“To what extent do you find the following statements important for you to join a national emergency pandemic workforce?”*. The questionnaire was developed by an expert panel in a process of 4 iterations.

**Results:** Students responded from March 16<sup>th</sup> 2020 and 7 days forth. 486 students of 688 completed the survey. 80% had decided to join the pandemic emergency healthcare workforce. Ranked median scores for motivational statements were: care for fellow human beings, 100; learning opportunities, 90; pride in contributing, 83; being part of a team, 77; skills being needed, 75; own safety, 75; guidance in the work, 75; job opportunities, 73; duty, 66; salary, 62; participation in a historic event, 50. Interestingly, students added that support by the university and clarification study plans were priorities.

**Conclusions:** Results guide decisionmakers and colleagues on how to motivate or reinforce medical students in joining the pandemic emergency healthcare workforce.

## Article summary:

**Strengths and limitations of this study:**

- 1  
2  
3  
4  
5  
6  
7  
8  
9  
10  
11  
12  
13  
14  
15  
16  
17  
18  
19  
20  
21  
22  
23  
24  
25  
26  
27  
28  
29  
30  
31  
32  
33  
34  
35  
36  
37  
38  
39  
40  
41  
42  
43  
44  
45  
46  
47  
48  
49  
50  
51  
52  
53  
54  
55  
56  
57  
58  
59  
60
- Addresses the question on how to inspire medical students to join medical staff when a healthcare workforce is depleted during a pandemic, as one in four may abandon work to protect their families and themselves
  - Investigates medical students motivation for joining the pandemic emergency healthcare workforce during the SARS-CoV-2 pandemic
  - Presents detailed data on issues important to medical students and hands-on recommendations for clinicians and administrators
  - As data are from a PBL-university using spiral learning, they may not be applicable to medical students from all universities

1  
2  
3  
4  
5  
6  
7  
8  
9  
10  
11  
12  
13  
14  
15  
16  
17  
18  
19  
20  
21  
22  
23  
24  
25  
26  
27  
28  
29  
30  
31  
32  
33  
34  
35  
36  
37  
38  
39  
40  
41  
42  
43  
44  
45  
46  
47  
48  
49  
50  
51  
52  
53  
54  
55  
56  
57  
58  
59  
60

## Introduction

In December 2019, a new disease emerged in Wuhan city, the capital of Hubei province in China: the severe acute respiratory syndrome coronavirus 2 (SARS-CoV-2), previously known as 2019-nCoV.<sup>1</sup> The virus spreads rapidly, and mortality is a concern as death counts are climbing world-wide.<sup>2</sup> On the 11<sup>th</sup> of March 2020, the Director-General of the World Health Organization declared the outbreak of SARS-CoV-2 a pandemic.<sup>2</sup>

Turning to Europe, the impact of SARS-CoV-2 is currently seen in Italy with an immediate increase in intensive care unit admissions and fatalities have stunned the country.<sup>3</sup> Mid-February 2020, the alarm for an unknown presence of SARS-COV-2 in the Italian general population was set-off. Here, a patient tested positive for SARS-COV-2 and admitted to intensive care in Lodi, Lombardy, Italy. During the following 24 hours, an additional 35 cases were admitted without transmission from the first case. Thus, Italy sets the scene through a case-scenario for what is to come for healthcare systems across the world, with a high risk of these being pushed beyond capacities. Thus, promptly preparing health services to deal with such a scenario is crucial.

It is critical to be aware that healthcare staff is a finite resource that is likely to become depleted during a pandemic as a result of illness.<sup>4</sup> Further, one in four doctors and final-year medical students may abandon work during a pandemic, to protect their families and themselves.<sup>5</sup> The lack of healthcare workers has earlier been described during both the influenza pandemic of 1918 and the polio epidemic in 1952.<sup>6,7</sup> Here, medical students were key contributors to the pandemic emergency healthcare workforce and ensured vital care for patients. The same recruitment strategy could offer a solution to a healthcare workforce depletion during the current SARS-COV2 pandemic. Hence, it is important to clarify what motivates medical students to join a pandemic emergency healthcare workforce. This led us to conduct a survey among all medical students at Aalborg University, Aalborg, Denmark, on what motivates them to join the pandemic emergency healthcare workforce, as the pandemic was in its early phase.

## Methods

This paper is reported according to the Strengthening the Reporting of Observational Studies in Epidemiology (STROBE) guideline.<sup>8</sup>

### Study design and setting

We conducted a cross-sectional study using a survey questionnaire distributed at one point in time. The questionnaire was distributed on the 16<sup>th</sup> of March 2020 to all medical students at Aalborg University through individual institutional e-mail addresses. Datacollection closed on the 23<sup>rd</sup> of March 2020.

### Participants

We invited all medical students enrolled at Aalborg University, Aalborg, Denmark, at the time the questionnaire was distributed (n = 688). No exclusion criteria were applied. Admission to medical schools in Denmark rely on grades, medical education is free of charge, and it takes six years to become a medical doctor. At the medical school of Aalborg University, the guiding teaching principle is problem-based learning, and years four to six comprise learning in a clinical environment qualifying students to work as locum physicians when having completed the fourth year. The total number of medical students at Aalborg University increases by year groups as the medical education at Aalborg University expanded from an initial 35 graduating students in 2016 to an annual admission of 179 students from 2018 onwards.

The study did not involve patients.

### Variables

#### *Development of the research questionnaire*

The questionnaire was constructed in a four-phase process. First, an expert panel was established comprising a medical student (AE) to ensure medical students' priorities, experience and preferences, a junior doctor (MSA), and a senior consultant with a focus on education (SA). This group performed a brainstorm on all likely



1  
2  
3  
4 relevant motivational points that could motivate medical students to join the pandemic emergency  
5  
6 healthcare workforce. Second, a selection of key points that were considered to influence medical students'  
7  
8 motivation on volunteering for the pandemic emergency healthcare workforce during the SARS-CoV-2 crisis  
9  
10 was performed. Third, the questionnaire was constructed, and a final iteration focused on adding missed  
11  
12 domains by two experts on education (JE, SR). Fourth, a process of method optimisation was conducted to  
13  
14 enhance the quality of the final questionnaire (GVBS, SA).  
15  
16

### 17 18 *Content of the questionnaire*

19  
20  
21 The questionnaire is available in the appendix in an English translation as well as the original version in  
22  
23 Danish. It includes questions on both demographics and motivational factors. For demographics we recorded  
24  
25 gender, age, number of semesters completed, and clinical experience obtained aside from clinical  
26  
27 placements planned in the curriculum. For questions on motivational factors, we presented 11 motivational  
28  
29 statements following an overarching question: *"To what extent do you find the following statements*  
30  
31 *important for you to join a national emergency pandemic workforce?"* (translation from Danish: *"I hvilken*  
32  
33 *grad er følgende vigtigt for, at du melder dig til at indgå i et nationalt pandemi beredskab?"*). The motivational  
34  
35 statements included revolved around the care for fellow human beings, learning opportunities, pride in  
36  
37 contributing, being part of a team, skills being needed, own safety, guidance in the work, job opportunities,  
38  
39 duty, salary, and participation in a historic event. Students were asked to score each statement on a Visual  
40  
41 Analog Scale from 0 to 100 with 0 being to a very low extent and 100 being to a very great extent. The  
42  
43 questionnaire concluded by asking their status regarding joining the pandemic emergency healthcare  
44  
45 workforce with reply options being: "Have joined", "Want to join", "Consider joining", "Have decided not to  
46  
47 join", or "Undecided as to whether to join or not".  
48  
49  
50  
51

### 52 53 **Data management**

54  
55  
56 Data were collected and managed using Research Electronic Data Capture (REDCap) electronic data capture  
57  
58 tools hosted at Region Nordjylland.<sup>9,10</sup> REDCap is a secure, web-based software platform designed to support  
59  
60

1  
2  
3  
4 data capture for research studies, providing 1) an intuitive interface for validated data capture; 2) audit trails  
5  
6 for tracking data manipulation and export procedures; 3) automated export procedures for seamless data  
7  
8 downloads to common statistical packages, and 4) procedures for data integration and interoperability with  
9  
10 external sources.  
11  
12

### 13 **Bias**

14  
15  
16 Selection bias in our available population was avoided by distributing the questionnaire to all medical  
17  
18 students. We strived to avoid non-response bias by using neutral wording and formulations.  
19  
20  
21

### 22 **Statistical analysis**

23  
24  
25 In Denmark, one semester is equal to a half year of education, and we merged semesters to report  
26  
27 advancement in full study years completed. Age groups were constructed by 20 years and below, 21-25 years,  
28  
29 26-30 years, and 31 years or older. Years of clinical experience were calculated and students were grouped  
30  
31 by below 1 year, 1-2 years, 2-3 years and more than 3 years. For the question on motivational factors, we  
32  
33 considered a score above 60 as high and above 80 as very high.  
34  
35

36  
37 Variables were summarised using standard descriptive statistics. If normally distributed, continuous, and  
38  
39 discrete, variables were summarised using means with standard deviations. If non-normally distributed  
40  
41 medians with interquartile range were used. Normality of distributions were checked using QQ-plots and  
42  
43 histograms. Categorical data were displayed using proportions. Comparisons were performed using Mann-  
44  
45 Whitney for comparison of two groups, Kruskal-Wallis test for comparison of several groups, and chi-squared  
46  
47 test for comparing proportions. A p-value less than 0.05 was considered statistically significant.  
48  
49

50  
51 Missing data accounted for 0.10% of demographic data and 0.36% of motivational statements. Therefore,  
52  
53 imputations were not performed, and observations with missing data were otherwise included in the  
54  
55 analyses.  
56  
57  
58  
59  
60

1  
2  
3  
4 The sample size was determined by the number of medical students enrolled at the bachelor and master  
5 programs in medicine at Aalborg University, Aalborg, Denmark, during the study period. The statistical  
6 software for the Social Sciences was used (IBM Corp. IBM SPSS Statistics for Windows, Version 13.0. NY: IBM  
7 Corp.)  
8  
9  
10  
11  
12

### 13 14 **Patient and public involvement:**

15  
16 Patient and public involvement was incorporated by giving AE a distinct role during the problem-based  
17 learning process.<sup>11</sup> AE contributed to the clarification of terms, had a separate time slot during brainstorming,  
18 and making the scribe list. All views by AE on each issue were recorded and considered. A similar emphasis  
19 was put on the student contribution put forward by AE during the discussion of problems and possible  
20 explanations drawn on the student's knowledge and identification of areas of incomplete knowledge during  
21 the review step.<sup>11</sup> This contributed to the selection of domains, and the construction of the questionnaire.  
22  
23 AE added to the consideration of the burden and time required to participate in the survey. AE is a 5<sup>th</sup>-year  
24 medical student representing medical students by being the head of the Danish Medical Students  
25 organization for Anesthesiology and Traumatology, a member of Medical Students Council, a member of  
26 Aalborg University Hospital's steering committee on education of medical students to participate in the  
27 pandemic as well as a locum physician at the Department of Orthopaedic Surgery at Aalborg University  
28 Hospital. The experience along with contacts among fellow students and organisations will contribute to the  
29 dissemination of the survey results among students regionally and nationally.  
30  
31  
32  
33  
34  
35  
36  
37  
38  
39  
40  
41  
42  
43  
44  
45  
46  
47  
48  
49  
50

## 51 **Results**

### 52 *Characteristics of participants*

53  
54  
55  
56 The participation rate was 70.6% with 486 out of 688 medical students responding to the survey invitation,  
57 and with 415 (60.3%) responding within 48 hours. Table 1 lists the characteristics of the medical students  
58  
59  
60

1  
2  
3  
4 participating. The sample did not differ from the available population of medical students at Aalborg  
5  
6 University in terms of gender (male/female, 32.3/67.7%; chi-squared 0.16,  $p > 0.1$ ), and age (median (IQR): 23  
7  
8 (3) years in the sample,  $p > 0.1$ ). The median (IQR) of clinical experience was 3 (12) months. All but 35.2% had  
9  
10 previous clinical experience. Being a substitute assistant nurse was the main non-curricular clinical  
11  
12 occupation accounting for 35.8% of all medical students. Secondly, being a locum physician was seen in  
13  
14 13.6% of all medical students and 27.5% of those in the final 3 clinical years.  
15  
16

### 17 18 *Motivation scores*

19  
20  
21 Four out of five stated that they had joined, or wanted to join the pandemic emergency healthcare workforce,  
22  
23 while 18.4% (89) were undecided (Table 1).  
24

25  
26 Table 2 lists the scores for each statement ranked by score. In general, the scores were high or very high with  
27  
28 "Help fellow humans", "Learning opportunity", and "Pride in contributing" receiving the highest scores. "To  
29  
30 join the fellowship" and "My skills are needed" receive a high score along with "My protection is a priority"  
31  
32 and "Supervisor will support me". "Participation in a historic event" and "Being paid" did not receive high  
33  
34 scores.  
35  
36

### 37 38 *Worries added by students*

39  
40  
41 Additional motivational factors mentioned by responding students were primarily related to study activities.  
42  
43 The competition for time used for reading, uncertainty regarding the need for reading, changing of study  
44  
45 plans, and the risk of being barred from exams due to absence from clinical placements were concerns raised.  
46  
47 Encouragement from the university was important to some. Also, the risk of being infected was listed as a  
48  
49 priority. To the other end, helping future colleagues was emphasized along with the quality and kind of work  
50  
51 they would participate in. Finally, it was stated that the questions should have been on what prevents medical  
52  
53 students from contributing rather than on what motives them to join.  
54  
55

### 56 57 *Differences among students*

1  
2  
3  
4 “Supervisor will support me” was given increasing priority with advancing study years. Scores for “This is  
5 expected from me” rose after the early study years. “Being paid” received low scores during the first 3 years,  
6  
7 and was higher in medical students at the 3 final clinical years. Scores for “Help fellow humans” were higher  
8  
9 by female students but scores were high for students of all genders.  
10  
11  
12

13  
14 The eight who had replied “decided not to participate” in the pandemic emergency healthcare workforce  
15  
16 had markedly lower scores for “Help fellow humans” compared to those who replied “aimed to joined” or  
17  
18 “had join” (median 77/100/100,  $p<0.001$ ). The same accounted for “To join the fellowship” (65/75/80,  
19  
20  $p=0.005$ ) and for “Proud to contribute” (60/86/90,  $p<0.001$ ). “My protection is a priority” scored slightly  
21  
22 different (97/75/75,  $p=0.056$ ).  
23  
24  
25  
26  
27  
28

## 29 **Discussion**

### 30 **Key results**

31  
32  
33 The majority of medical students were willing to participate in the pandemic emergency healthcare  
34  
35 workforce, but they had concerns that should be and can be addressed when acknowledged. Hospitals and  
36  
37 senior colleagues can accommodate the request for guidance in the clinical work using available tools and  
38  
39 thereby support unique learning opportunities for medical students.<sup>12</sup> Such collaborative efforts support  
40  
41 medical students teaming up with the medical fellowship to further strengthen the push for participation  
42  
43 and learning.<sup>13</sup> In addition, this can be a benefit to the students' self-satisfaction and appreciation of their  
44  
45 efforts.  
46  
47  
48

49  
50 Importantly, medical students put forward a request for protection of themselves when participating in a  
51  
52 pandemic emergency healthcare workforce. This concern should be addressed by hospitals during by eg.  
53  
54 training sessions and theoretical prequalification before starting clinical work. The safety should also be  
55  
56 addressed by senior colleagues during clinical work. There was limited emphasis on salary and academic  
57  
58 resume, but these factors still gained a medium score and may be addressed during recruitment.  
59  
60

1  
2  
3  
4 Factors linked to study activity should be addressed. The university should settle uncertainty concerning  
5  
6 study plans and exams to provide clear guidance for students. Finally, students listed that encouragement by  
7  
8 the university to participate in a pandemic emergency healthcare workforce could be an incentive.  
9

### 10 11 **Strengths and Limitations**

12  
13  
14 A strength of this survey was the timing. The SARS-CoV-2 pandemic was announced at the time of sending  
15  
16 out survey invitation, and death rates were high in China and rapidly rising in Southern Europe while the link  
17  
18 was open. This emphasized the severity of the situation and may have encouraged medical students to  
19  
20 consider whether to participate in the pandemic emergency workforce. A limitation was 29% non-  
21  
22 participants. However, age, gender, and distribution between study years were comparable to the  
23  
24 responders. It may be speculated that non-responders were undecided students. The scores of 18.4% of  
25  
26 responders undecided on whether to join the pandemic emergency healthcare workforce, were just under  
27  
28 median scores. Adding such scores is unlikely to alter the conclusions. A note must be taken that the survey  
29  
30 was performed in Denmark, which has tax-funded healthcare and free education. This could influence the  
31  
32 motivation of the students.  
33  
34  
35

### 36 37 **Interpretation**

38  
39  
40 An earlier study reported that more than 80% of medical students in the US would volunteer to participate  
41  
42 in the healthcare workforce during a pandemic.<sup>4</sup> Our numbers were similar for a tax-funded health care  
43  
44 system in Europe. Also, a concern for educational interruptions with an ongoing pandemic crisis was similar  
45  
46 between our medical students in Europe and a group in North America.<sup>14</sup> Motivation of healthcare workers  
47  
48 in general during a pandemic parallel some of our findings among medical students, including safety, being  
49  
50 part of a team, and feeling useful.<sup>15,16</sup>  
51  
52

### 53 54 **Generalisability**

55  
56 The generalisability is affected in a few ways. First, the survey was conducted at a university using problem  
57  
58 based learning and a spiral curriculum with the students embedded in the clinical environment for the final  
59  
60

1  
2  
3  
4 three years.<sup>17</sup> Second, the education being for free may also influence motivation. However, medical students  
5  
6 responded similar in two domains to those in North America suggesting similar responses despite these  
7  
8 differences.  
9

### 10 11 **Clinical implications**

12  
13 The most noticeable implication is that medical students provide a resource eager to contribute to patient  
14  
15 treatment and care during a pandemic emergency if a few relevant needs are met as detailed in this report,  
16  
17 and that this can easily be accommodated.  
18

### 19 20 **Future research**

21  
22 Future studies could evaluate if priorities changed with the crises at a distance and if priorities vary between  
23  
24 medical students at universities with different curricula and pedagogical approaches to learning.  
25

### 26 27 **Conclusion**

28  
29 The present study provides a list of items and priorities to inspire and guide clinicians and administrators  
30  
31 at both hospitals and universities to support recruiting medical students for a pandemic emergency  
32  
33 healthcare workforce. Hands-on recommendations include emphasizing learning opportunity, supervision,  
34  
35 acceptance of educational interruptions by, and support from, university.  
36  
37  
38  
39  
40  
41  
42  
43  
44  
45  
46  
47  
48  
49  
50  
51  
52  
53  
54  
55  
56  
57  
58  
59  
60

**Transparency statement:**

The lead author (the manuscript's guarantor) affirms that the manuscript is an honest, accurate, and transparent account of the study being reported; that no important aspects of the study have been omitted; and that any discrepancies from the study as originally planned (and, if relevant, registered) have been explained.

**Contributors:**

Conceptualisation: MSA, SR, JE, AE and SA. Formal analysis: MSA and SA. Methodology: MSA, AE, SA, SR, JE and GVBS. Project administration: MSA and SA. Resources: SA, GVBS and JE. Software: GVBS. Supervision: SA and GVBS. Validation: JE. Visualisation: MSA. Writing – Original Draft Preparation: MSA. Writing – Review and editing: MSA, SA, GVBS, AE, SR, JE. The corresponding author attests that all listed authors meet authorship criteria and that no others meeting the criteria have been omitted. Mike S Astorp is the guarantor of the study.

**Funding:**

This research received no funding support.

**Competing interests:**

All authors have completed the ICMJE uniform disclosure form at [www.icmje.org/coi\\_disclosure.pdf](http://www.icmje.org/coi_disclosure.pdf) and declare: no support from any organisation for the submitted work; no financial relationships with any organisations that might have an interest in the submitted work in the previous three years; no other relationships or activities that could appear to have influenced the submitted work.

**Ethics:**

Written informed consent was obtained from all students by agreeing to answer the questionnaire. Due to the study being a survey, ethical approval was not required according to the Danish Act on the Scientific



1  
2  
3  
4  
5  
6  
7  
8  
9  
10  
11  
12  
13  
14  
15  
16  
17  
18  
19  
20  
21  
22  
23  
24  
25  
26  
27  
28  
29  
30  
31  
32  
33  
34  
35  
36  
37  
38  
39  
40  
41  
42  
43  
44  
45  
46  
47  
48  
49  
50  
51  
52  
53  
54  
55  
56  
57  
58  
59  
60

Ethical Committee System (Act no. 593, section 14, subsection 2). Approval was obtained from the Danish Data Protection Agency (record number 2020-030).

**Data sharing statement:**

The questionnaire will be shared in the appendix both in the original (Danish) and in a translation to English. Extra data is available by emailing the corresponding author while individual participant data cannot be shared for the reason of confidentiality.

**Copyright and license for publication:**

The Corresponding Author has the right to grant on behalf of all authors and does grant on behalf of all authors, a worldwide licence to the Publishers and its licensees in perpetuity, in all forms, formats, and media (whether known now or created in the future), to i) publish, reproduce, distribute, display and store the Contribution, ii) translate the Contribution into other languages, create adaptations, reprints, include within collections and create summaries, extracts and/or, abstracts of the Contribution, iii) create any other derivative work(s) based on the Contribution, iv) to exploit all subsidiary rights in the Contribution, v) the inclusion of electronic links from the Contribution to third party material where-ever it may be located; and, vi) licence any third party to do any or all of the above.

**Dissemination to participants and related patient and public communities:**

Results will be distributed to Danish government officials with responsibility for providing national healthcare, Aalborg University, The North Denmark Region, all medical students at Aalborg University, the Organization for Danish medical students (FADL), the organization for medical students at Aalborg University.

## References

1. Zhou F, Yu T, Du R, et al. Clinical course and risk factors for mortality of adult inpatients with COVID-19 in Wuhan, China: a retrospective cohort study. *Lancet*. 2020;6736(20):1-9. doi:10.1016/S0140-6736(20)30566-3
2. Kinross P, Suetens C, Gomes Dias J, et al. Rapidly increasing cumulative incidence of coronavirus disease (COVID-19) in the European Union/European Economic Area and the United Kingdom, 1 January to 15 March 2020. *Eurosurveillance*. March 2020. doi:10.2807/1560-7917.ES.2020.25.11.2000285
3. Grasselli G, Pesenti A, Cecconi M. Critical Care Utilization for the COVID-19 Outbreak in Lombardy, Italy. *JAMA*. March 2020. doi:10.1001/jama.2020.4031
4. Herman B, Rosychuk RJ, Bailey T, Lake R, Yonge O, Marrie TJ. Medical students and pandemic influenza. *Emerg Infect Dis*. 2007;13(11):1781-1783. doi:10.3201/eid1311.070279
5. Ehrenstein BP, Hanses F, Salzberger B. Influenza pandemic and professional duty: family or patients first? A survey of hospital employees. *BMC Public Health*. 2006;6(1):311. doi:10.1186/1471-2458-6-311
6. Starr I. Influenza in 1918: Recollections of the Epidemic in Philadelphia. *Ann Intern Med*. 2006;145(2):138. doi:10.7326/0003-4819-145-2-200607180-00132
7. Astrup P, Gotzche H, Neukirch F. Laboratory Investigations during Treatment of Patients with Poliomyelitis and Respiratory Paralysis. *BMJ*. 1954;1(4865):780-786. doi:10.1136/bmj.1.4865.780
8. Vandembroucke JP, Von Elm E, Altman DG, et al. Strengthening the Reporting of Observational Studies in Epidemiology (STROBE): Explanation and elaboration. *PLoS Med*. 2007;4(10):1628-1654. doi:10.1371/journal.pmed.0040297
9. Harris PA, Taylor R, Minor BL, et al. The REDCap consortium: Building an international community of software platform partners. *J Biomed Inform*. 2019;95:103208. doi:10.1016/j.jbi.2019.103208
10. Harris PA, Taylor R, Thielke R, Payne J, Gonzalez N, Conde JG. Research electronic data capture (REDCap)—A metadata-driven methodology and workflow process for providing translational research informatics support. *J Biomed Inform*. 2009;42(2):377-381. doi:10.1016/j.jbi.2008.08.010
11. Wood DF. Problem based learning What is problem based learning? *Bmj*. 2003;326(February):328-330. doi:10.1136/bmj.326.7384.328
12. Spencer J. ABC of learning and teaching in medicine: Learning and teaching in the clinical environment. *Br Med J*. 2003;326(7389):591-594. doi:10.1136/bmj.326.7389.591
13. Dornan T, Medical M. Supporting medical students' workplace learning: *Clin Teach*. 2009;6:167-171.
14. Clark J. Fear of SARS thwarts medical education in Toronto. *BMJ*. 2003;326(7393):784c - 784. doi:10.1136/bmj.326.7393.784/c
15. Anantham D, McHugh W, O'Neill S, Forrow L. Clinical review: Influenza pandemic - Physicians and their obligations. *Crit Care*. 2008;12(3):2-6. doi:10.1186/cc6918
16. Ives J, Greenfield S, Parry JM, et al. Healthcare workers' attitudes to working during pandemic influenza: a qualitative study. *BMC Public Health*. 2009;9(1):56. doi:10.1186/1471-2458-9-56

17. Andersen S, Stentoft D, Emmersen J, Rasmussen S, Birkelund S, Nøhr S. Contention over undergraduate medical curriculum content. *Int J Med Educ.* 2019;10:230-231. doi:10.5116/ijme.5de7.7516

Table 1  
Characteristics of medical students participating in the survey

|                                    |                   | %    | N     |         |
|------------------------------------|-------------------|------|-------|---------|
| Age groups                         |                   |      |       |         |
|                                    | up to 20 y        | 9.1  | 44    |         |
|                                    | 21-25 y           | 71,6 | 348   |         |
|                                    | 26-30 y           | 15,2 | 74    |         |
|                                    | 31+ y             | 4.1  | 20    |         |
|                                    | total             | 100  | 486   |         |
| Gender*                            |                   |      |       |         |
|                                    | Male              | 31.1 | 151   |         |
|                                    | Female            | 68.5 | 332   |         |
|                                    | Other             | 0.4  | 2     |         |
|                                    | total             | 100  | 485   |         |
| Study year                         |                   |      |       | total** |
|                                    | 1.                | 66.5 | 115   | 173     |
|                                    | 2.                | 57.7 | 86    | 149     |
|                                    | 3.                | 82.5 | 104   | 126     |
|                                    | 4.                | 74.1 | 80    | 108     |
|                                    | 5.                | 88.0 | 73    | 83      |
|                                    | 6.                | 57.1 | 486   | 49      |
|                                    | overall           | 70.6 | 486   | 688     |
| Clinical experience (years)*       |                   |      |       |         |
|                                    | < 1 y             | ***  | 76.0  | 369     |
|                                    | 1-2 y             |      | 12.2  | 59      |
|                                    | 2-3 y             |      | 6.0   | 29      |
|                                    | 3+ y              |      | 5.8   | 28      |
|                                    | total             |      | 100.0 | 485     |
| Joins pandemic emergency workforce |                   |      |       |         |
|                                    | Has joined        | 63.4 | 308   |         |
|                                    | Aims to join      | 16.7 | 81    |         |
|                                    | Considers to join | 16.5 | 80    |         |
|                                    | Don't know        | 1.9  | 9     |         |
|                                    | Won't join        | 1.6  | 8     |         |
| Among decided                      |                   |      |       |         |
|                                    | yes               | 98.0 | 389   |         |
|                                    | no                | 2.0  | 8     |         |

\* missing data: 1 gender; 1 clinical experience

\*\* the total number of medical students rise by study year as the education is expanding from the first doctors graduating in 2016.

1  
2  
3  
4  
5  
6  
7  
8  
9  
10  
11  
12  
13  
14  
15  
16  
17  
18  
19  
20  
21  
22  
23  
24  
25  
26  
27  
28  
29  
30  
31  
32  
33  
34  
35  
36  
37  
38  
39  
40  
41  
42  
43  
44  
45  
46  
47  
48  
49  
50  
51  
52  
53  
54  
55  
56  
57  
58  
59  
60

For peer review only

Table 2

Scores for joining the pandemic emergency healthcare force as stated by medical students in reply to the question:

"To what extent do you find the following statements important for you to join a national emergency workforce for a pandemic?". Scores were on a scale from 0 to 100.

|                                 | Median | 25; 75 percentiles | Mean | P; gender / study year |
|---------------------------------|--------|--------------------|------|------------------------|
| Care                            |        |                    | 92.8 |                        |
| Help fellow humans              | 100    | 88; 100            |      | 0.001 / 0.068          |
| Learn                           |        |                    | 84.7 |                        |
| Learning opportunity            | 90     | 75; 100            |      | ns / ns                |
| Pride                           |        |                    | 79.0 |                        |
| Proud to contribute             | 83     | 66; 100            |      | ns / ns                |
| Team                            |        |                    | 73.3 |                        |
| To join the fellowship          | 77     | 60; 100            |      | ns / ns                |
| Needed                          |        |                    | 73.4 |                        |
| My skills are needed            | 75     | 60; 94             |      | ns / 0.053             |
| Precaution                      |        |                    | 71.7 |                        |
| My protection is a priority     | 75     | 50; 99             |      | 0.024 / 0.085          |
| Guidance                        |        |                    | 72.5 |                        |
| Supervisor will support me      | 75     | 55; 93             |      | 0.014 / <0.001         |
| Job                             |        |                    | 69.4 |                        |
| Enhance my academic resume      | 73     | 51; 93             |      | 0.030 / 0.003          |
| Duty                            |        |                    | 60.1 |                        |
| This is expected from me        | 66     | 47; 80             |      | ns / 0.001             |
| Salary                          |        |                    | 60.9 |                        |
| Being paid                      | 62     | 50; 84             |      | ns / <0.001            |
| History                         |        |                    | 50.9 |                        |
| Participate in a historic event | 50     | 21; 76             |      | 0.060 / ns             |

ns: p >0.1 in Mann-Whitney and Kruskal-Wallis test for gender and study year respectively  
15 responders had missing data comprising 0.3% of all data. Imputations were omitted.

## English translation of the questionnaire:

| #  | Question:                                                                                                                                                                                                                                                       | Response:                                                                                                                                                                                                                                                                                                                                                 |
|----|-----------------------------------------------------------------------------------------------------------------------------------------------------------------------------------------------------------------------------------------------------------------|-----------------------------------------------------------------------------------------------------------------------------------------------------------------------------------------------------------------------------------------------------------------------------------------------------------------------------------------------------------|
| 1  | Please provide your age in whole years.                                                                                                                                                                                                                         | Individual response in whole years.                                                                                                                                                                                                                                                                                                                       |
| 2  | Which gender do you identify yourself with the most?                                                                                                                                                                                                            | <ol style="list-style-type: none"> <li>1. Male.</li> <li>2. Female.</li> <li>3. Others.</li> </ol>                                                                                                                                                                                                                                                        |
| 3  | <p>How many semesters have you completed?</p> <p>This includes both semesters completed in the Bachelor and Masters programme in medicine.</p>                                                                                                                  | <ol style="list-style-type: none"> <li>1. 1 semester.</li> <li>2. 2 semesters.</li> <li>3. 3 semesters.</li> <li>4. 4 semesters.</li> <li>5. 5 semesters.</li> <li>6. 6 semesters.</li> <li>7. 7 semesters.</li> <li>8. 8 semesters.</li> <li>9. 9 semesters.</li> <li>10. 10 semesters.</li> <li>11. 11 semesters.</li> <li>12. 12 semesters.</li> </ol> |
| 4  | <p>Aside from your university studies, how many full months of clinical experience have you gained currently?</p> <p>This includes both experiences gained as a substitute assistant nurse, ventilator assistant, locum physician, phlebotomist, or others.</p> | Individual response in full months.                                                                                                                                                                                                                                                                                                                       |
| 5  | What are your other clinical experiences based on?                                                                                                                                                                                                              | <ol style="list-style-type: none"> <li>1. Substitute assistant nurse</li> <li>2. Ventilator assistant</li> <li>3. Locum physician</li> <li>4. Phlebotomist</li> <li>5. Others.</li> <li>6. Not relevant</li> </ol>                                                                                                                                        |
| 5a | If you selected "Others" in Question 5, what are your clinical experiences based on?                                                                                                                                                                            | Individual response.                                                                                                                                                                                                                                                                                                                                      |
| 6  | To what extent do you find the following statements important for you to join a national emergency preparedness for a pandemic?                                                                                                                                 |                                                                                                                                                                                                                                                                                                                                                           |

|    |           |                                                                                                                                                    |
|----|-----------|----------------------------------------------------------------------------------------------------------------------------------------------------|
| 1  |           |                                                                                                                                                    |
| 2  |           |                                                                                                                                                    |
| 3  |           |                                                                                                                                                    |
| 4  |           |                                                                                                                                                    |
| 5  | <b>6a</b> | - I would like to help my fellow human beings.                                                                                                     |
| 6  |           | Visual Analog Scale: 0 = To a very low extent, 100 = To a very great extent                                                                        |
| 7  | <b>6b</b> | - It is expected of me.                                                                                                                            |
| 8  |           | Visual Analog Scale: 0 = To a very low extent, 100 = To a very great extent                                                                        |
| 9  | <b>6c</b> | - I will become a part of the fellowship of medical doctors.                                                                                       |
| 10 |           | Visual Analog Scale: 0 = To a very low extent, 100 = To a very great extent                                                                        |
| 11 | <b>6d</b> | - I will enhance my academic resume.                                                                                                               |
| 12 |           | Visual Analog Scale: 0 = To a very low extent, 100 = To a very great extent                                                                        |
| 13 | <b>6e</b> | - Precautions have been taken so that I will not be infected during work.                                                                          |
| 14 |           | Visual Analog Scale: 0 = To a very low extent, 100 = To a very great extent                                                                        |
| 15 | <b>6f</b> | - I will be supervised in my work.                                                                                                                 |
| 16 |           | Visual Analog Scale: 0 = To a very low extent, 100 = To a very great extent                                                                        |
| 17 | <b>6g</b> | - I will get paid for my work.                                                                                                                     |
| 18 |           | Visual Analog Scale: 0 = To a very low extent, 100 = To a very great extent                                                                        |
| 19 | <b>6h</b> | - I will get an opportunity to learn something.                                                                                                    |
| 20 |           | Visual Analog Scale: 0 = To a very low extent, 100 = To a very great extent                                                                        |
| 21 | <b>6i</b> | - I will become a part of a historic event.                                                                                                        |
| 22 |           | Visual Analog Scale: 0 = To a very low extent, 100 = To a very great extent                                                                        |
| 23 | <b>6j</b> | - I will be told that there is a need for me.                                                                                                      |
| 24 |           | Visual Analog Scale: 0 = To a very low extent, 100 = To a very great extent                                                                        |
| 25 | <b>6k</b> | - I will get proud of contributing.                                                                                                                |
| 26 |           | Visual Analog Scale: 0 = To a very low extent, 100 = To a very great extent                                                                        |
| 27 | <b>7</b>  | Do you have any additional motivating motives not already asked about?                                                                             |
| 28 |           | Individual response.                                                                                                                               |
| 29 | <b>8</b>  | In terms of joining a national emergency preparedness against a pandemic, how would you weigh inclination over obligation to join?                 |
| 30 |           | Visual Analog Scale: 0 = Inclination to join, 100 = Obligation to join.                                                                            |
| 31 | <b>9</b>  | In terms of possibly joining a national emergency preparedness against a pandemic, which of the following statements best describes your decision? |
| 32 |           | 1. I have volunteered.<br>2. I want to volunteer.<br>3. I am considering to volunteer.<br>4. I will not volunteer.<br>5. I do not know             |
| 33 |           |                                                                                                                                                    |
| 34 |           |                                                                                                                                                    |
| 35 |           |                                                                                                                                                    |
| 36 |           |                                                                                                                                                    |
| 37 |           |                                                                                                                                                    |
| 38 |           |                                                                                                                                                    |
| 39 |           |                                                                                                                                                    |
| 40 |           |                                                                                                                                                    |
| 41 |           |                                                                                                                                                    |
| 42 |           |                                                                                                                                                    |
| 43 |           |                                                                                                                                                    |
| 44 |           |                                                                                                                                                    |
| 45 |           |                                                                                                                                                    |
| 46 |           |                                                                                                                                                    |
| 47 |           |                                                                                                                                                    |
| 48 |           |                                                                                                                                                    |
| 49 |           |                                                                                                                                                    |
| 50 |           |                                                                                                                                                    |
| 51 |           |                                                                                                                                                    |
| 52 |           |                                                                                                                                                    |
| 53 |           |                                                                                                                                                    |
| 54 |           |                                                                                                                                                    |
| 55 |           |                                                                                                                                                    |
| 56 |           |                                                                                                                                                    |
| 57 |           |                                                                                                                                                    |
| 58 |           |                                                                                                                                                    |
| 59 |           |                                                                                                                                                    |
| 60 |           |                                                                                                                                                    |

1  
2  
3  
4 Spørgeskema:  
5

- 6 - Alder  
7 - Hvilket køn identificerer du dig bedst med? (Vælg et: Mand, kvinde, andet)  
8 - Hvor mange fulde semestre har du gennemført?  
9 - Hvor mange fulde måneders klinisk erfaring ved siden af medicinstudiet har du på nuværende  
10 tidspunkt? (Dette både som FADL-sygeplejevikar (SPV), FADL-ventilatør og lægevikar)  
11 - Hvad er din kliniske erfaring baseret på? (Vælg flere: FADL-sygeplejevikar (SPV), FADL-ventilatør og  
12 lægevikar, andet)  
13  
14  
15  
16

17 I hvilken grad er følgende vigtigt for at du melder dig til at indgå i et nationalt pandemi beredskab?  
18

- 19 - Samfundssind (altruisme);  
20 Eksempel: jeg vil bidrage med det jeg kan, for at hjælpe mine medmennesker?  
21  
22  
23  
24 - Samfundspligt  
25 Eksempel: jeg bidrager fordi det forventes af mig  
26  
27  
28  
29 - Sammenhold  
30 Eksempel: Jeg er en del af det lægelige fællesskab  
31  
32  
33  
34 - Jobmulighed  
35 Eksempel: jeg har en chance for at få job i et fagligt nyt område  
36  
37  
38  
39 - Fysiske Rammer  
40 Eksempel: Jeg er sikker på, at der er taget forholdsregler, så jeg ikke bliver smittet under arbejdet  
41  
42  
43  
44 - Tryghed  
45 Eksempel: Jeg er sikker på at modtage tilstrækkelig supervision i trygge rammer  
46  
47  
48  
49 - Økonomi  
50 Eksempel: jeg er sikker på at få løn for arbejdet  
51  
52  
53  
54 - Læring  
55 Eksempel: at jeg får mulighed for at lære noget, jeg ellers ikke havde mulighed for  
56  
57  
58  
59 - Aktualitet  
60



1  
2  
3  
4  
5  
6  
7  
8  
9  
10  
11  
12  
13  
14  
15  
16  
17  
18  
19  
20  
21  
22  
23  
24  
25  
26  
27  
28  
29  
30  
31  
32  
33  
34  
35  
36  
37  
38  
39  
40  
41  
42  
43  
44  
45  
46  
47  
48  
49  
50  
51  
52  
53  
54  
55  
56  
57  
58  
59  
60

Eksempel: at jeg er en del af en historisk begivenhed

- Kriseberedskab

Eksempel: Jeg får at vide, at der er brug for mig

- Stolthed

Eksempel: at jeg vil føle en stolthed over at bidrage

- Har du yderligere årsager, som motiverer dig, der ikke er spurgt ind til?

For peer review only

STROBE Statement—Checklist of items that should be included in reports of *cross-sectional studies*

|                              | Item No | Recommendation                                                                                                                                                                                                                                                                                                                                                                                                |
|------------------------------|---------|---------------------------------------------------------------------------------------------------------------------------------------------------------------------------------------------------------------------------------------------------------------------------------------------------------------------------------------------------------------------------------------------------------------|
| <b>Title and abstract</b>    | 1       | (a) Indicate the study's design with a commonly used term in the title or the abstract<br>(b) Provide in the abstract an informative and balanced summary of what was done and what was found                                                                                                                                                                                                                 |
| <b>Introduction</b>          |         |                                                                                                                                                                                                                                                                                                                                                                                                               |
| Background/rationale         | 2       | Explain the scientific background and rationale for the investigation being reported                                                                                                                                                                                                                                                                                                                          |
| Objectives                   | 3       | State specific objectives, including any prespecified hypotheses                                                                                                                                                                                                                                                                                                                                              |
| <b>Methods</b>               |         |                                                                                                                                                                                                                                                                                                                                                                                                               |
| Study design                 | 4       | Present key elements of study design early in the paper                                                                                                                                                                                                                                                                                                                                                       |
| Setting                      | 5       | Describe the setting, locations, and relevant dates, including periods of recruitment, exposure, follow-up, and data collection                                                                                                                                                                                                                                                                               |
| Participants                 | 6       | (a) Give the eligibility criteria, and the sources and methods of selection of participants                                                                                                                                                                                                                                                                                                                   |
| Variables                    | 7       | Clearly define all outcomes, exposures, predictors, potential confounders, and effect modifiers. Give diagnostic criteria, if applicable                                                                                                                                                                                                                                                                      |
| Data sources/<br>measurement | 8*      | For each variable of interest, give sources of data and details of methods of assessment (measurement). Describe comparability of assessment methods if there is more than one group                                                                                                                                                                                                                          |
| Bias                         | 9       | Describe any efforts to address potential sources of bias                                                                                                                                                                                                                                                                                                                                                     |
| Study size                   | 10      | Explain how the study size was arrived at                                                                                                                                                                                                                                                                                                                                                                     |
| Quantitative variables       | 11      | Explain how quantitative variables were handled in the analyses. If applicable, describe which groupings were chosen and why                                                                                                                                                                                                                                                                                  |
| Statistical methods          | 12      | (a) Describe all statistical methods, including those used to control for confounding<br>(b) Describe any methods used to examine subgroups and interactions<br>(c) Explain how missing data were addressed<br>(d) If applicable, describe analytical methods taking account of sampling strategy<br>(e) Describe any sensitivity analyses                                                                    |
| <b>Results</b>               |         |                                                                                                                                                                                                                                                                                                                                                                                                               |
| Participants                 | 13*     | (a) Report numbers of individuals at each stage of study—eg numbers potentially eligible, examined for eligibility, confirmed eligible, included in the study, completing follow-up, and analysed<br>(b) Give reasons for non-participation at each stage<br>(c) Consider use of a flow diagram                                                                                                               |
| Descriptive data             | 14*     | (a) Give characteristics of study participants (eg demographic, clinical, social) and information on exposures and potential confounders<br>(b) Indicate number of participants with missing data for each variable of interest                                                                                                                                                                               |
| Outcome data                 | 15*     | Report numbers of outcome events or summary measures                                                                                                                                                                                                                                                                                                                                                          |
| Main results                 | 16      | (a) Give unadjusted estimates and, if applicable, confounder-adjusted estimates and their precision (eg, 95% confidence interval). Make clear which confounders were adjusted for and why they were included<br>(b) Report category boundaries when continuous variables were categorized<br>(c) If relevant, consider translating estimates of relative risk into absolute risk for a meaningful time period |
| Other analyses               | 17      | Report other analyses done—eg analyses of subgroups and interactions, and sensitivity analyses                                                                                                                                                                                                                                                                                                                |

1  
2  
3  
4  
5  
6  
7  
8  
9  
10  
11  
12  
13  
14  
15  
16  
17  
18  
19  
20  
21  
22  
23  
24  
25  
26  
27  
28  
29  
30  
31  
32  
33  
34  
35  
36  
37  
38  
39  
40  
41  
42  
43  
44  
45  
46  
47  
48  
49  
50  
51  
52  
53  
54  
55  
56  
57  
58  
59  
60

| <b>Discussion</b>        |    |                                                                                                                                                                            |
|--------------------------|----|----------------------------------------------------------------------------------------------------------------------------------------------------------------------------|
| Key results              | 18 | Summarise key results with reference to study objectives                                                                                                                   |
| Limitations              | 19 | Discuss limitations of the study, taking into account sources of potential bias or imprecision. Discuss both direction and magnitude of any potential bias                 |
| Interpretation           | 20 | Give a cautious overall interpretation of results considering objectives, limitations, multiplicity of analyses, results from similar studies, and other relevant evidence |
| Generalisability         | 21 | Discuss the generalisability (external validity) of the study results                                                                                                      |
| <b>Other information</b> |    |                                                                                                                                                                            |
| Funding                  | 22 | Give the source of funding and the role of the funders for the present study and, if applicable, for the original study on which the present article is based              |

\*Give information separately for exposed and unexposed groups.

**Note:** An Explanation and Elaboration article discusses each checklist item and gives methodological background and published examples of transparent reporting. The STROBE checklist is best used in conjunction with this article (freely available on the Web sites of PLoS Medicine at <http://www.plosmedicine.org/>, Annals of Internal Medicine at <http://www.annals.org/>, and Epidemiology at <http://www.epidem.com/>). Information on the STROBE Initiative is available at [www.strobe-statement.org](http://www.strobe-statement.org).

# BMJ Open

## Support for mobilizing medical students to join the SARS-CoV-2 pandemic emergency healthcare workforce – a cross-sectional questionnaire survey

|                               |                                                                                                                                                                                                                                                                                                                                                                                                                                                                                                 |
|-------------------------------|-------------------------------------------------------------------------------------------------------------------------------------------------------------------------------------------------------------------------------------------------------------------------------------------------------------------------------------------------------------------------------------------------------------------------------------------------------------------------------------------------|
| Journal:                      | <i>BMJ Open</i>                                                                                                                                                                                                                                                                                                                                                                                                                                                                                 |
| Manuscript ID                 | bmjopen-2020-039082                                                                                                                                                                                                                                                                                                                                                                                                                                                                             |
| Article Type:                 | Original research                                                                                                                                                                                                                                                                                                                                                                                                                                                                               |
| Date Submitted by the Author: | 03-Apr-2020                                                                                                                                                                                                                                                                                                                                                                                                                                                                                     |
| Complete List of Authors:     | Astorp, Mike; Aalborg University Hospital, Department of Geriatric Medicine<br>Sørensen, Gustav; Aalborg University Hospital, Department of Geriatric Medicine<br>Rasmussen, Sten; Aalborg University Hospital, Orthopaedic Surgery Research Unit<br>Emmersen, Jeppe; Aalborg University Faculty of Medicine<br>Erbs, Alexander; Aalborg University Faculty of Medicine<br>Andersen, Stig; Aalborg Universitet, Clinical Medicine; Aalborg University Hospital, Geriatric and Internal Medicine |
| Keywords:                     | MEDICAL EDUCATION & TRAINING, Health policy < HEALTH SERVICES ADMINISTRATION & MANAGEMENT, HEALTH SERVICES ADMINISTRATION & MANAGEMENT                                                                                                                                                                                                                                                                                                                                                          |
|                               |                                                                                                                                                                                                                                                                                                                                                                                                                                                                                                 |

SCHOLARONE™  
Manuscripts



I, the Submitting Author has the right to grant and does grant on behalf of all authors of the Work (as defined in the below author licence), an exclusive licence and/or a non-exclusive licence for contributions from authors who are: i) UK Crown employees; ii) where BMJ has agreed a CC-BY licence shall apply, and/or iii) in accordance with the terms applicable for US Federal Government officers or employees acting as part of their official duties; on a worldwide, perpetual, irrevocable, royalty-free basis to BMJ Publishing Group Ltd ("BMJ") its licensees and where the relevant Journal is co-owned by BMJ to the co-owners of the Journal, to publish the Work in this journal and any other BMJ products and to exploit all rights, as set out in our [licence](#).

The Submitting Author accepts and understands that any supply made under these terms is made by BMJ to the Submitting Author unless you are acting as an employee on behalf of your employer or a postgraduate student of an affiliated institution which is paying any applicable article publishing charge ("APC") for Open Access articles. Where the Submitting Author wishes to make the Work available on an Open Access basis (and intends to pay the relevant APC), the terms of reuse of such Open Access shall be governed by a Creative Commons licence – details of these licences and which [Creative Commons](#) licence will apply to this Work are set out in our licence referred to above.

Other than as permitted in any relevant BMJ Author's Self Archiving Policies, I confirm this Work has not been accepted for publication elsewhere, is not being considered for publication elsewhere and does not duplicate material already published. I confirm all authors consent to publication of this Work and authorise the granting of this licence.

1  
2  
3  
4  
5  
6 Support for mobilizing medical students to join the SARS-CoV-2  
7  
8 pandemic emergency healthcare workforce – a cross-sectional  
9  
10 questionnaire survey  
11  
12  
13  
14  
15

16 **Mike S Astorp<sup>1,2</sup> (0000-0003-4062-6027), Gustav V B Sørensen<sup>1,2</sup> (0000-0002-7944-9913), Sten**  
17 **Rasmussen<sup>2,3</sup> (0000-0002-8664-352X), Jeppe Emmersen<sup>4</sup> (0000-0001-6244-1280), Alexander W**  
18 **Erbs<sup>4</sup> (0000-0003-3651-1112), Stig Andersen<sup>1,2</sup> (0000-0003-3632-5213).**  
19  
20  
21  
22  
23  
24

25 1 - Department of Geriatric Medicine, Aalborg University Hospital, 9000 Aalborg, Denmark

26 2 - Department of Clinical Medicine, Aalborg University, 9000 Aalborg, Denmark

27 3 - Department of Orthopaedic Surgery, Aalborg University Hospital, 9000 Aalborg, Denmark

28 4 - Faculty of Medicine, Aalborg University, Niels Jernes Vej 10, 9000 Aalborg, Denmark  
29  
30  
31  
32  
33  
34  
35  
36

37 **Correspondence to:**

38 Mike S Astorp

39 e-mail: [m.astorp@rn.dk](mailto:m.astorp@rn.dk)

40 Department of Clinical Medicine

41 Faculty of Health, Aalborg University

42 Sonder Skovvej 15

43 9000 Aalborg

44 Denmark  
45  
46  
47  
48  
49  
50  
51  
52  
53  
54  
55  
56  
57  
58  
59  
60

1  
2  
3  
4  
5  
6  
7  
8  
9  
10  
11  
12  
13  
14  
15  
16  
17  
18  
19  
20  
21  
22  
23  
24  
25  
26  
27  
28  
29  
30  
31  
32  
33  
34  
35  
36  
37  
38  
39  
40  
41  
42  
43  
44  
45  
46  
47  
48  
49  
50  
51  
52  
53  
54  
55  
56  
57  
58  
59  
60

## Abstract:

**Objective:** Identifying points important for medical students to join the pandemic emergency healthcare workforce.

**Design:** Cross-sectional.

**Setting:** Aalborg University, Denmark.

**Participants:** All medical students.

**Main outcome measures:** Demographic characteristics and 11 motivational points scored on a Visual Analog Scale from 0 (low) to 100 (high) responding to the question: *“To what extent do you find the following statements important for you to join a national emergency pandemic workforce?”*. The questionnaire was developed by an expert panel in a process of 4 iterations.

**Results:** Students responded from March 16<sup>th</sup> 2020 and 7 days forth. 486 students of 688 completed the survey. 80% had decided to join the pandemic emergency healthcare workforce. Ranked median scores for motivational statements were: care for fellow human beings, 100; learning opportunities, 90; pride in contributing, 83; being part of a team, 77; skills being needed, 75; own safety, 75; guidance in the work, 75; job opportunities, 73; duty, 66; salary, 62; participation in a historic event, 50. Interestingly, students added that support by the university and clarification study plans were priorities.

**Conclusions:** Results guide decisionmakers and colleagues on how to motivate or reinforce medical students in joining the pandemic emergency healthcare workforce.

## Article summary:

**Strengths and limitations of this study:**

- 1  
2  
3  
4  
5  
6  
7  
8  
9  
10  
11  
12  
13  
14  
15  
16  
17  
18  
19  
20  
21  
22  
23  
24  
25  
26  
27  
28  
29  
30  
31  
32  
33  
34  
35  
36  
37  
38  
39  
40  
41  
42  
43  
44  
45  
46  
47  
48  
49  
50  
51  
52  
53  
54  
55  
56  
57  
58  
59  
60
- Addresses the question on how to inspire medical students to join medical staff when a healthcare workforce is depleted during a pandemic, as one in four may abandon work to protect their families and themselves
  - Investigates medical students motivation for joining the pandemic emergency healthcare workforce during the SARS-CoV-2 pandemic
  - Presents detailed data on issues important to medical students and hands-on recommendations for clinicians and administrators
  - As data are from a PBL-university using spiral learning, they may not be applicable to medical students from all universities



1  
2  
3  
4  
5  
6  
7  
8  
9  
10  
11  
12  
13  
14  
15  
16  
17  
18  
19  
20  
21  
22  
23  
24  
25  
26  
27  
28  
29  
30  
31  
32  
33  
34  
35  
36  
37  
38  
39  
40  
41  
42  
43  
44  
45  
46  
47  
48  
49  
50  
51  
52  
53  
54  
55  
56  
57  
58  
59  
60

## Introduction

In December 2019, a new disease emerged in Wuhan city, the capital of Hubei province in China: the severe acute respiratory syndrome coronavirus 2 (SARS-CoV-2), previously known as 2019-nCoV.<sup>1</sup> The virus spreads rapidly, and mortality is a concern as death counts are climbing world-wide.<sup>2</sup> On the 11<sup>th</sup> of March 2020, the Director-General of the World Health Organization declared the outbreak of SARS-CoV-2 a pandemic.<sup>2</sup>

Turning to Europe, the impact of SARS-CoV-2 is currently seen in Italy with an immediate increase in intensive care unit admissions and fatalities have stunned the country.<sup>3</sup> Mid-February 2020, the alarm for an unknown presence of SARS-COV-2 in the Italian general population was set-off. Here, a patient tested positive for SARS-COV-2 and admitted to intensive care in Lodi, Lombardy, Italy. During the following 24 hours, an additional 35 cases were admitted without transmission from the first case. Thus, Italy sets the scene through a case-scenario for what is to come for healthcare systems across the world, with a high risk of these being pushed beyond capacities. Thus, promptly preparing health services to deal with such a scenario is crucial.

It is critical to be aware that healthcare staff is a finite resource that is likely to become depleted during a pandemic as a result of illness.<sup>4</sup> Further, one in four doctors and final-year medical students may abandon work during a pandemic, to protect their families and themselves.<sup>5</sup> The lack of healthcare workers has earlier been described during both the influenza pandemic of 1918 and the polio epidemic in 1952.<sup>6,7</sup> Here, medical students were key contributors to the pandemic emergency healthcare workforce and ensured vital care for patients. The same recruitment strategy could offer a solution to a healthcare workforce depletion during the current SARS-COV2 pandemic. Hence, it is important to clarify what motivates medical students to join a pandemic emergency healthcare workforce. This led us to conduct a survey among all medical students at Aalborg University, Aalborg, Denmark, on what motivates them to join the pandemic emergency healthcare workforce, as the pandemic was in its early phase.

## Methods

This paper is reported according to the Strengthening the Reporting of Observational Studies in Epidemiology (STROBE) guideline.<sup>8</sup>

### Study design and setting

We conducted a cross-sectional study using a survey questionnaire distributed at one point in time. The questionnaire was distributed on the 16<sup>th</sup> of March 2020 to all medical students at Aalborg University through individual institutional e-mail addresses. Datacollection closed on the 23<sup>rd</sup> of March 2020.

### Participants

We invited all medical students enrolled at Aalborg University, Aalborg, Denmark, at the time the questionnaire was distributed (n = 688). No exclusion criteria were applied. Admission to medical schools in Denmark rely on grades, medical education is free of charge, and it takes six years to become a medical doctor. At the medical school of Aalborg University, the guiding teaching principle is problem-based learning, and years four to six comprise learning in a clinical environment qualifying students to work as locum physicians when having completed the fourth year. The total number of medical students at Aalborg University increases by year groups as the medical education at Aalborg University expanded from an initial 35 graduating students in 2016 to an annual admission of 179 students from 2018 onwards.

The study did not involve patients.

### Variables

#### *Development of the research questionnaire*

The questionnaire was constructed in a four-phase process. First, an expert panel was established comprising a medical student (AE) to ensure medical students' priorities, experience and preferences, a junior doctor (MSA), and a senior consultant with a focus on education (SA). This group performed a brainstorm on all likely

1  
2  
3  
4 relevant motivational points that could motivate medical students to join the pandemic emergency  
5  
6 healthcare workforce. Second, a selection of key points that were considered to influence medical students'  
7  
8 motivation on volunteering for the pandemic emergency healthcare workforce during the SARS-CoV-2 crisis  
9  
10 was performed. Third, the questionnaire was constructed, and a final iteration focused on adding missed  
11  
12 domains by two experts on education (JE, SR). Fourth, a process of method optimisation was conducted to  
13  
14 enhance the quality of the final questionnaire (GVBS, SA).  
15  
16

### 17 18 *Content of the questionnaire*

19  
20  
21 The questionnaire is available in the appendix in an English translation as well as the original version in  
22  
23 Danish. It includes questions on both demographics and motivational factors. For demographics we recorded  
24  
25 gender, age, number of semesters completed, and clinical experience obtained aside from clinical  
26  
27 placements planned in the curriculum. For questions on motivational factors, we presented 11 motivational  
28  
29 statements following an overarching question: *"To what extent do you find the following statements*  
30  
31 *important for you to join a national emergency pandemic workforce?"* (translation from Danish: *"I hvilken*  
32  
33 *grad er følgende vigtigt for, at du melder dig til at indgå i et nationalt pandemi beredskab?"*). The motivational  
34  
35 statements included revolved around the care for fellow human beings, learning opportunities, pride in  
36  
37 contributing, being part of a team, skills being needed, own safety, guidance in the work, job opportunities,  
38  
39 duty, salary, and participation in a historic event. Students were asked to score each statement on a Visual  
40  
41 Analog Scale from 0 to 100 with 0 being to a very low extent and 100 being to a very great extent. The  
42  
43 questionnaire concluded by asking their status regarding joining the pandemic emergency healthcare  
44  
45 workforce with reply options being: "Have joined", "Want to join", "Consider joining", "Have decided not to  
46  
47 join", or "Undecided as to whether to join or not".  
48  
49  
50  
51

### 52 53 **Data management**

54  
55  
56 Data were collected and managed using Research Electronic Data Capture (REDCap) electronic data capture  
57  
58 tools hosted at Region Nordjylland.<sup>9,10</sup> REDCap is a secure, web-based software platform designed to support  
59  
60

1  
2  
3  
4 data capture for research studies, providing 1) an intuitive interface for validated data capture; 2) audit trails  
5  
6 for tracking data manipulation and export procedures; 3) automated export procedures for seamless data  
7  
8 downloads to common statistical packages, and 4) procedures for data integration and interoperability with  
9  
10 external sources.  
11

### 12 13 **Bias**

14  
15  
16 Selection bias in our available population was avoided by distributing the questionnaire to all medical  
17  
18 students. We strived to avoid non-response bias by using neutral wording and formulations.  
19  
20  
21

### 22 **Statistical analysis**

23  
24  
25 In Denmark, one semester is equal to a half year of education, and we merged semesters to report  
26  
27 advancement in full study years completed. Age groups were constructed by 20 years and below, 21-25 years,  
28  
29 26-30 years, and 31 years or older. Years of clinical experience were calculated and students were grouped  
30  
31 by below 1 year, 1-2 years, 2-3 years and more than 3 years. For the question on motivational factors, we  
32  
33 considered a score above 60 as high and above 80 as very high.  
34  
35

36  
37 Variables were summarised using standard descriptive statistics. If normally distributed, continuous, and  
38  
39 discrete, variables were summarised using means with standard deviations. If non-normally distributed  
40  
41 medians with interquartile range were used. Normality of distributions were checked using QQ-plots and  
42  
43 histograms. Categorical data were displayed using proportions. Comparisons were performed using Mann-  
44  
45 Whitney for comparison of two groups, Kruskal-Wallis test for comparison of several groups, and chi-squared  
46  
47 test for comparing proportions. A p-value less than 0.05 was considered statistically significant.  
48  
49

50  
51 Missing data accounted for 0.10% of demographic data and 0.36% of motivational statements. Therefore,  
52  
53 imputations were not performed, and observations with missing data were otherwise included in the  
54  
55 analyses.  
56  
57  
58  
59  
60

1  
2  
3  
4 The sample size was determined by the number of medical students enrolled at the bachelor and master  
5 programs in medicine at Aalborg University, Aalborg, Denmark, during the study period. The statistical  
6 software for the Social Sciences was used (IBM Corp. IBM SPSS Statistics for Windows, Version 13.0. NY: IBM  
7 Corp.)  
8  
9  
10  
11  
12

### 13 14 **Patient and public involvement:**

15  
16 Patient and public involvement was incorporated by giving AE a distinct role during the problem-based  
17 learning process.<sup>11</sup> AE contributed to the clarification of terms, had a separate time slot during brainstorming,  
18 and making the scribe list. All views by AE on each issue were recorded and considered. A similar emphasis  
19 was put on the student contribution put forward by AE during the discussion of problems and possible  
20 explanations drawn on the student's knowledge and identification of areas of incomplete knowledge during  
21 the review step.<sup>11</sup> This contributed to the selection of domains, and the construction of the questionnaire.  
22 AE added to the consideration of the burden and time required to participate in the survey. AE is a 5<sup>th</sup>-year  
23 medical student representing medical students by being the head of the Danish Medical Students  
24 organization for Anesthesiology and Traumatology, a member of Medical Students Council, a member of  
25 Aalborg University Hospital's steering committee on education of medical students to participate in the  
26 pandemic as well as a locum physician at the Department of Orthopaedic Surgery at Aalborg University  
27 Hospital. The experience along with contacts among fellow students and organisations will contribute to the  
28 dissemination of the survey results among students regionally and nationally.  
29  
30  
31  
32  
33  
34  
35  
36  
37  
38  
39  
40  
41  
42  
43  
44  
45  
46  
47  
48  
49  
50

## 51 **Results**

### 52 *Characteristics of participants*

53  
54  
55  
56 The participation rate was 70.6% with 486 out of 688 medical students responding to the survey invitation,  
57 and with 415 (60.3%) responding within 48 hours. Table 1 lists the characteristics of the medical students  
58  
59  
60

1  
2  
3  
4 participating. The sample did not differ from the available population of medical students at Aalborg  
5  
6 University in terms of gender (male/female, 32.3/67.7%; chi-squared 0.16,  $p > 0.1$ ), and age (median (IQR): 23  
7  
8 (3) years in the sample,  $p > 0.1$ ). The median (IQR) of clinical experience was 3 (12) months. All but 35.2% had  
9  
10 previous clinical experience. Being a substitute assistant nurse was the main non-curricular clinical  
11  
12 occupation accounting for 35.8% of all medical students. Secondly, being a locum physician was seen in  
13  
14 13.6% of all medical students and 27.5% of those in the final 3 clinical years.  
15  
16

### 17 18 *Motivation scores*

19  
20  
21 Four out of five stated that they had joined, or wanted to join the pandemic emergency healthcare workforce,  
22  
23 while 18.4% (89) were undecided (Table 1).  
24

25  
26 Table 2 lists the scores for each statement ranked by score. In general, the scores were high or very high with  
27  
28 “Help fellow humans”, “Learning opportunity”, and “Pride in contributing” receiving the highest scores. “To  
29  
30 join the fellowship” and “My skills are needed” receive a high score along with “My protection is a priority”  
31  
32 and “Supervisor will support me”. “Participation in a historic event” and “Being paid” did not receive high  
33  
34 scores.  
35  
36

### 37 38 *Worries added by students*

39  
40  
41 Additional motivational factors mentioned by responding students were primarily related to study activities.  
42  
43 The competition for time used for reading, uncertainty regarding the need for reading, changing of study  
44  
45 plans, and the risk of being barred from exams due to absence from clinical placements were concerns raised.  
46  
47 Encouragement from the university was important to some. Also, the risk of being infected was listed as a  
48  
49 priority. To the other end, helping future colleagues was emphasized along with the quality and kind of work  
50  
51 they would participate in. Finally, it was stated that the questions should have been on what prevents medical  
52  
53 students from contributing rather than on what motives them to join.  
54  
55

### 56 57 *Differences among students*

1  
2  
3  
4 “Supervisor will support me” was given increasing priority with advancing study years. Scores for “This is  
5  
6 expected from me” rose after the early study years. “Being paid” received low scores during the first 3 years,  
7  
8 and was higher in medical students at the 3 final clinical years. Scores for “Help fellow humans” were higher  
9  
10 by female students but scores were high for students of all genders.  
11  
12

13  
14 The eight who had replied “decided not to participate” in the pandemic emergency healthcare workforce  
15  
16 had markedly lower scores for “Help fellow humans” compared to those who replied “aimed to joined” or  
17  
18 “had join” (median 77/100/100,  $p<0.001$ ). The same accounted for “To join the fellowship” (65/75/80,  
19  
20  $p=0.005$ ) and for “Proud to contribute” (60/86/90,  $p<0.001$ ). “My protection is a priority” scored slightly  
21  
22 different (97/75/75,  $p=0.056$ ).  
23  
24  
25  
26  
27  
28

## 29 **Discussion**

### 30 **Key results**

31  
32  
33 The majority of medical students were willing to participate in the pandemic emergency healthcare  
34  
35 workforce, but they had concerns that should be and can be addressed when acknowledged. Hospitals and  
36  
37 senior colleagues can accommodate the request for guidance in the clinical work using available tools and  
38  
39 thereby support unique learning opportunities for medical students.<sup>12</sup> Such collaborative efforts support  
40  
41 medical students teaming up with the medical fellowship to further strengthen the push for participation  
42  
43 and learning.<sup>13</sup> In addition, this can be a benefit to the students' self-satisfaction and appreciation of their  
44  
45 efforts.  
46  
47  
48

49  
50 Importantly, medical students put forward a request for protection of themselves when participating in a  
51  
52 pandemic emergency healthcare workforce. This concern should be addressed by hospitals during by eg.  
53  
54 training sessions and theoretical prequalification before starting clinical work. The safety should also be  
55  
56 addressed by senior colleagues during clinical work. There was limited emphasis on salary and academic  
57  
58 resume, but these factors still gained a medium score and may be addressed during recruitment.  
59  
60

1  
2  
3  
4 Factors linked to study activity should be addressed. The university should settle uncertainty concerning  
5  
6 study plans and exams to provide clear guidance for students. Finally, students listed that encouragement by  
7  
8 the university to participate in a pandemic emergency healthcare workforce could be an incentive.  
9

### 10 11 **Strengths and Limitations**

12  
13  
14 A strength of this survey was the timing. The SARS-CoV-2 pandemic was announced at the time of sending  
15  
16 out survey invitation, and death rates were high in China and rapidly rising in Southern Europe while the link  
17  
18 was open. This emphasized the severity of the situation and may have encouraged medical students to  
19  
20 consider whether to participate in the pandemic emergency workforce. A limitation was 29% non-  
21  
22 participants. However, age, gender, and distribution between study years were comparable to the  
23  
24 responders. It may be speculated that non-responders were undecided students. The scores of 18.4% of  
25  
26 responders undecided on whether to join the pandemic emergency healthcare workforce, were just under  
27  
28 median scores. Adding such scores is unlikely to alter the conclusions. A note must be taken that the survey  
29  
30 was performed in Denmark, which has tax-funded healthcare and free education. This could influence the  
31  
32 motivation of the students.  
33  
34  
35

### 36 37 **Interpretation**

38  
39  
40 An earlier study reported that more than 80% of medical students in the US would volunteer to participate  
41  
42 in the healthcare workforce during a pandemic.<sup>4</sup> Our numbers were similar for a tax-funded health care  
43  
44 system in Europe. Also, a concern for educational interruptions with an ongoing pandemic crisis was similar  
45  
46 between our medical students in Europe and a group in North America.<sup>14</sup> Motivation of healthcare workers  
47  
48 in general during a pandemic parallel some of our findings among medical students, including safety, being  
49  
50 part of a team, and feeling useful.<sup>15,16</sup>  
51  
52

### 53 54 **Generalisability**

55  
56 The generalisability is affected in a few ways. First, the survey was conducted at a university using problem  
57  
58 based learning and a spiral curriculum with the students embedded in the clinical environment for the final  
59  
60



1  
2  
3  
4 three years.<sup>17</sup> Second, the education being for free may also influence motivation. However, medical students  
5  
6 responded similar in two domains to those in North America suggesting similar responses despite these  
7  
8 differences.  
9

### 10 11 **Clinical implications**

12  
13 The most noticeable implication is that medical students provide a resource eager to contribute to patient  
14  
15 treatment and care during a pandemic emergency if a few relevant needs are met as detailed in this report,  
16  
17 and that this can easily be accommodated.  
18

### 19 20 **Future research**

21  
22 Future studies could evaluate if priorities changed with the crises at a distance and if priorities vary between  
23  
24 medical students at universities with different curricula and pedagogical approaches to learning.  
25

### 26 27 **Conclusion**

28  
29 The present study provides a list of items and priorities to inspire and guide clinicians and administrators  
30  
31 at both hospitals and universities to support recruiting medical students for a pandemic emergency  
32  
33 healthcare workforce. Hands-on recommendations include emphasizing learning opportunity, supervision,  
34  
35 acceptance of educational interruptions by, and support from, university.  
36  
37  
38  
39  
40  
41  
42  
43  
44  
45  
46  
47  
48  
49  
50  
51  
52  
53  
54  
55  
56  
57  
58  
59  
60

**Transparency statement:**

The lead author (the manuscript's guarantor) affirms that the manuscript is an honest, accurate, and transparent account of the study being reported; that no important aspects of the study have been omitted; and that any discrepancies from the study as originally planned (and, if relevant, registered) have been explained.

**Contributors:**

Conceptualisation: MSA, SR, JE, AE and SA. Formal analysis: MSA and SA. Methodology: MSA, AE, SA, SR, JE and GVBS. Project administration: MSA and SA. Resources: SA, GVBS and JE. Software: GVBS. Supervision: SA and GVBS. Validation: JE. Visualisation: MSA. Writing – Original Draft Preparation: MSA. Writing – Review and editing: MSA, SA, GVBS, AE, SR, JE. The corresponding author attests that all listed authors meet authorship criteria and that no others meeting the criteria have been omitted. Mike S Astorp is the guarantor of the study.

**Funding:**

This research received no funding support.

**Competing interests:**

All authors have completed the ICMJE uniform disclosure form at [www.icmje.org/coi\\_disclosure.pdf](http://www.icmje.org/coi_disclosure.pdf) and declare: no support from any organisation for the submitted work; no financial relationships with any organisations that might have an interest in the submitted work in the previous three years; no other relationships or activities that could appear to have influenced the submitted work.

**Ethics:**

Written informed consent was obtained from all students by agreeing to answer the questionnaire. Due to the study being a survey, ethical approval was not required according to the Danish Act on the Scientific

1  
2  
3  
4  
5  
6  
7  
8  
9  
10  
11  
12  
13  
14  
15  
16  
17  
18  
19  
20  
21  
22  
23  
24  
25  
26  
27  
28  
29  
30  
31  
32  
33  
34  
35  
36  
37  
38  
39  
40  
41  
42  
43  
44  
45  
46  
47  
48  
49  
50  
51  
52  
53  
54  
55  
56  
57  
58  
59  
60

Ethical Committee System (Act no. 593, section 14, subsection 2). Approval was obtained from the Danish Data Protection Agency (record number 2020-030).

**Data sharing statement:**

The questionnaire will be shared in the appendix both in the original (Danish) and in a translation to English. Extra data is available by emailing the corresponding author while individual participant data cannot be shared for the reason of confidentiality.

**Copyright and license for publication:**

The Corresponding Author has the right to grant on behalf of all authors and does grant on behalf of all authors, a worldwide licence to the Publishers and its licensees in perpetuity, in all forms, formats, and media (whether known now or created in the future), to i) publish, reproduce, distribute, display and store the Contribution, ii) translate the Contribution into other languages, create adaptations, reprints, include within collections and create summaries, extracts and/or, abstracts of the Contribution, iii) create any other derivative work(s) based on the Contribution, iv) to exploit all subsidiary rights in the Contribution, v) the inclusion of electronic links from the Contribution to third party material where-ever it may be located; and, vi) licence any third party to do any or all of the above.

**Dissemination to participants and related patient and public communities:**

Results will be distributed to Danish government officials with responsibility for providing national healthcare, Aalborg University, The North Denmark Region, all medical students at Aalborg University, the Organization for Danish medical students (FADL), the organization for medical students at Aalborg University.

## References

1. Zhou F, Yu T, Du R, et al. Clinical course and risk factors for mortality of adult inpatients with COVID-19 in Wuhan, China: a retrospective cohort study. *Lancet*. 2020;6736(20):1-9. doi:10.1016/S0140-6736(20)30566-3
2. Kinross P, Suetens C, Gomes Dias J, et al. Rapidly increasing cumulative incidence of coronavirus disease (COVID-19) in the European Union/European Economic Area and the United Kingdom, 1 January to 15 March 2020. *Eurosurveillance*. March 2020. doi:10.2807/1560-7917.ES.2020.25.11.2000285
3. Grasselli G, Pesenti A, Cecconi M. Critical Care Utilization for the COVID-19 Outbreak in Lombardy, Italy. *JAMA*. March 2020. doi:10.1001/jama.2020.4031
4. Herman B, Rosychuk RJ, Bailey T, Lake R, Yonge O, Marrie TJ. Medical students and pandemic influenza. *Emerg Infect Dis*. 2007;13(11):1781-1783. doi:10.3201/eid1311.070279
5. Ehrenstein BP, Hanses F, Salzberger B. Influenza pandemic and professional duty: family or patients first? A survey of hospital employees. *BMC Public Health*. 2006;6(1):311. doi:10.1186/1471-2458-6-311
6. Starr I. Influenza in 1918: Recollections of the Epidemic in Philadelphia. *Ann Intern Med*. 2006;145(2):138. doi:10.7326/0003-4819-145-2-200607180-00132
7. Astrup P, Gotzche H, Neukirch F. Laboratory Investigations during Treatment of Patients with Poliomyelitis and Respiratory Paralysis. *BMJ*. 1954;1(4865):780-786. doi:10.1136/bmj.1.4865.780
8. Vandembroucke JP, Von Elm E, Altman DG, et al. Strengthening the Reporting of Observational Studies in Epidemiology (STROBE): Explanation and elaboration. *PLoS Med*. 2007;4(10):1628-1654. doi:10.1371/journal.pmed.0040297
9. Harris PA, Taylor R, Minor BL, et al. The REDCap consortium: Building an international community of software platform partners. *J Biomed Inform*. 2019;95:103208. doi:10.1016/j.jbi.2019.103208
10. Harris PA, Taylor R, Thielke R, Payne J, Gonzalez N, Conde JG. Research electronic data capture (REDCap)—A metadata-driven methodology and workflow process for providing translational research informatics support. *J Biomed Inform*. 2009;42(2):377-381. doi:10.1016/j.jbi.2008.08.010
11. Wood DF. Problem based learning What is problem based learning? *Bmj*. 2003;326(February):328-330. doi:10.1136/bmj.326.7384.328
12. Spencer J. ABC of learning and teaching in medicine: Learning and teaching in the clinical environment. *Br Med J*. 2003;326(7389):591-594. doi:10.1136/bmj.326.7389.591
13. Dornan T, Medical M. Supporting medical students' workplace learning: *Clin Teach*. 2009;6:167-171.
14. Clark J. Fear of SARS thwarts medical education in Toronto. *BMJ*. 2003;326(7393):784c - 784. doi:10.1136/bmj.326.7393.784/c
15. Anantham D, McHugh W, O'Neill S, Forrow L. Clinical review: Influenza pandemic - Physicians and their obligations. *Crit Care*. 2008;12(3):2-6. doi:10.1186/cc6918
16. Ives J, Greenfield S, Parry JM, et al. Healthcare workers' attitudes to working during pandemic influenza: a qualitative study. *BMC Public Health*. 2009;9(1):56. doi:10.1186/1471-2458-9-56

17. Andersen S, Stentoft D, Emmersen J, Rasmussen S, Birkelund S, Nøhr S. Contention over undergraduate medical curriculum content. *Int J Med Educ.* 2019;10:230-231. doi:10.5116/ijme.5de7.7516

Table 1  
Characteristics of medical students participating in the survey

|                                    |                   | %    | N     |         |
|------------------------------------|-------------------|------|-------|---------|
| Age groups                         |                   |      |       |         |
|                                    | up to 20 y        | 9.1  | 44    |         |
|                                    | 21-25 y           | 71,6 | 348   |         |
|                                    | 26-30 y           | 15,2 | 74    |         |
|                                    | 31+ y             | 4.1  | 20    |         |
|                                    | total             | 100  | 486   |         |
| Gender*                            |                   |      |       |         |
|                                    | Male              | 31.1 | 151   |         |
|                                    | Female            | 68.5 | 332   |         |
|                                    | Other             | 0.4  | 2     |         |
|                                    | total             | 100  | 485   |         |
| Study year                         |                   |      |       | total** |
|                                    | 1.                | 66.5 | 115   | 173     |
|                                    | 2.                | 57.7 | 86    | 149     |
|                                    | 3.                | 82.5 | 104   | 126     |
|                                    | 4.                | 74.1 | 80    | 108     |
|                                    | 5.                | 88.0 | 73    | 83      |
|                                    | 6.                | 57.1 | 486   | 49      |
|                                    | overall           | 70.6 | 486   | 688     |
| Clinical experience (years)*       |                   |      |       |         |
|                                    | < 1 y             | ***  | 76.0  | 369     |
|                                    | 1-2 y             |      | 12.2  | 59      |
|                                    | 2-3 y             |      | 6.0   | 29      |
|                                    | 3+ y              |      | 5.8   | 28      |
|                                    | total             |      | 100.0 | 485     |
| Joins pandemic emergency workforce |                   |      |       |         |
|                                    | Has joined        | 63.4 | 308   |         |
|                                    | Aims to join      | 16.7 | 81    |         |
|                                    | Considers to join | 16.5 | 80    |         |
|                                    | Don't know        | 1.9  | 9     |         |
|                                    | Won't join        | 1.6  | 8     |         |
| Among decided                      |                   |      |       |         |
|                                    | yes               | 98.0 | 389   |         |
|                                    | no                | 2.0  | 8     |         |

\* missing data: 1 gender; 1 clinical experience

\*\* the total number of medical students rise by study year as the education is expanding from the first doctors graduating in 2016.

1  
2  
3  
4  
5  
6  
7  
8  
9  
10  
11  
12  
13  
14  
15  
16  
17  
18  
19  
20  
21  
22  
23  
24  
25  
26  
27  
28  
29  
30  
31  
32  
33  
34  
35  
36  
37  
38  
39  
40  
41  
42  
43  
44  
45  
46  
47  
48  
49  
50  
51  
52  
53  
54  
55  
56  
57  
58  
59  
60

For peer review only

Table 2

Scores for joining the pandemic emergency healthcare force as stated by medical students in reply to the question:

"To what extent do you find the following statements important for you to join a national emergency workforce for a pandemic?". Scores were on a scale from 0 to 100.

|                                 | Median | 25; 75 percentiles | Mean | P; gender / study year |
|---------------------------------|--------|--------------------|------|------------------------|
| Care                            |        |                    | 92.8 |                        |
| Help fellow humans              | 100    | 88; 100            |      | 0.001 / 0.068          |
| Learn                           |        |                    | 84.7 |                        |
| Learning opportunity            | 90     | 75; 100            |      | ns / ns                |
| Pride                           |        |                    | 79.0 |                        |
| Proud to contribute             | 83     | 66; 100            |      | ns / ns                |
| Team                            |        |                    | 73.3 |                        |
| To join the fellowship          | 77     | 60; 100            |      | ns / ns                |
| Needed                          |        |                    | 73.4 |                        |
| My skills are needed            | 75     | 60; 94             |      | ns / 0.053             |
| Precaution                      |        |                    | 71.7 |                        |
| My protection is a priority     | 75     | 50; 99             |      | 0.024 / 0.085          |
| Guidance                        |        |                    | 72.5 |                        |
| Supervisor will support me      | 75     | 55; 93             |      | 0.014 / <0.001         |
| Job                             |        |                    | 69.4 |                        |
| Enhance my academic resume      | 73     | 51; 93             |      | 0.030 / 0.003          |
| Duty                            |        |                    | 60.1 |                        |
| This is expected from me        | 66     | 47; 80             |      | ns / 0.001             |
| Salary                          |        |                    | 60.9 |                        |
| Being paid                      | 62     | 50; 84             |      | ns / <0.001            |
| History                         |        |                    | 50.9 |                        |
| Participate in a historic event | 50     | 21; 76             |      | 0.060 / ns             |

ns: p >0.1 in Mann-Whitney and Kruskal-Wallis test for gender and study year respectively  
15 responders had missing data comprising 0.3% of all data. Imputations were omitted.

## English translation of the questionnaire:

| #  | Question:                                                                                                                                                                                                                                                       | Response:                                                                                                                                                                                                                                                                                                                                                 |
|----|-----------------------------------------------------------------------------------------------------------------------------------------------------------------------------------------------------------------------------------------------------------------|-----------------------------------------------------------------------------------------------------------------------------------------------------------------------------------------------------------------------------------------------------------------------------------------------------------------------------------------------------------|
| 1  | Please provide your age in whole years.                                                                                                                                                                                                                         | Individual response in whole years.                                                                                                                                                                                                                                                                                                                       |
| 2  | Which gender do you identify yourself with the most?                                                                                                                                                                                                            | <ol style="list-style-type: none"> <li>1. Male.</li> <li>2. Female.</li> <li>3. Others.</li> </ol>                                                                                                                                                                                                                                                        |
| 3  | <p>How many semesters have you completed?</p> <p>This includes both semesters completed in the Bachelor and Masters programme in medicine.</p>                                                                                                                  | <ol style="list-style-type: none"> <li>1. 1 semester.</li> <li>2. 2 semesters.</li> <li>3. 3 semesters.</li> <li>4. 4 semesters.</li> <li>5. 5 semesters.</li> <li>6. 6 semesters.</li> <li>7. 7 semesters.</li> <li>8. 8 semesters.</li> <li>9. 9 semesters.</li> <li>10. 10 semesters.</li> <li>11. 11 semesters.</li> <li>12. 12 semesters.</li> </ol> |
| 4  | <p>Aside from your university studies, how many full months of clinical experience have you gained currently?</p> <p>This includes both experiences gained as a substitute assistant nurse, ventilator assistant, locum physician, phlebotomist, or others.</p> | Individual response in full months.                                                                                                                                                                                                                                                                                                                       |
| 5  | What are your other clinical experiences based on?                                                                                                                                                                                                              | <ol style="list-style-type: none"> <li>1. Substitute assistant nurse</li> <li>2. Ventilator assistant</li> <li>3. Locum physician</li> <li>4. Phlebotomist</li> <li>5. Others.</li> <li>6. Not relevant</li> </ol>                                                                                                                                        |
| 5a | If you selected "Others" in Question 5, what are your clinical experiences based on?                                                                                                                                                                            | Individual response.                                                                                                                                                                                                                                                                                                                                      |
| 6  | To what extent do you find the following statements important for you to join a national emergency preparedness for a pandemic?                                                                                                                                 |                                                                                                                                                                                                                                                                                                                                                           |



|    |           |                                                                                                                                                    |
|----|-----------|----------------------------------------------------------------------------------------------------------------------------------------------------|
| 1  |           |                                                                                                                                                    |
| 2  |           |                                                                                                                                                    |
| 3  |           |                                                                                                                                                    |
| 4  |           |                                                                                                                                                    |
| 5  | <b>6a</b> | - I would like to help my fellow human beings.                                                                                                     |
| 6  |           | Visual Analog Scale: 0 = To a very low extent, 100 = To a very great extent                                                                        |
| 7  | <b>6b</b> | - It is expected of me.                                                                                                                            |
| 8  |           | Visual Analog Scale: 0 = To a very low extent, 100 = To a very great extent                                                                        |
| 9  |           |                                                                                                                                                    |
| 10 | <b>6c</b> | - I will become a part of the fellowship of medical doctors.                                                                                       |
| 11 |           | Visual Analog Scale: 0 = To a very low extent, 100 = To a very great extent                                                                        |
| 12 | <b>6d</b> | - I will enhance my academic resume.                                                                                                               |
| 13 |           | Visual Analog Scale: 0 = To a very low extent, 100 = To a very great extent                                                                        |
| 14 | <b>6e</b> | - Precautions have been taken so that I will not be infected during work.                                                                          |
| 15 |           | Visual Analog Scale: 0 = To a very low extent, 100 = To a very great extent                                                                        |
| 16 | <b>6f</b> | - I will be supervised in my work.                                                                                                                 |
| 17 |           | Visual Analog Scale: 0 = To a very low extent, 100 = To a very great extent                                                                        |
| 18 | <b>6g</b> | - I will get paid for my work.                                                                                                                     |
| 19 |           | Visual Analog Scale: 0 = To a very low extent, 100 = To a very great extent                                                                        |
| 20 | <b>6h</b> | - I will get an opportunity to learn something.                                                                                                    |
| 21 |           | Visual Analog Scale: 0 = To a very low extent, 100 = To a very great extent                                                                        |
| 22 | <b>6i</b> | - I will become a part of a historic event.                                                                                                        |
| 23 |           | Visual Analog Scale: 0 = To a very low extent, 100 = To a very great extent                                                                        |
| 24 | <b>6j</b> | - I will be told that there is a need for me.                                                                                                      |
| 25 |           | Visual Analog Scale: 0 = To a very low extent, 100 = To a very great extent                                                                        |
| 26 | <b>6k</b> | - I will get proud of contributing.                                                                                                                |
| 27 |           | Visual Analog Scale: 0 = To a very low extent, 100 = To a very great extent                                                                        |
| 28 | <b>7</b>  | Do you have any additional motivating motives not already asked about?                                                                             |
| 29 |           | Individual response.                                                                                                                               |
| 30 | <b>8</b>  | In terms of joining a national emergency preparedness against a pandemic, how would you weigh inclination over obligation to join?                 |
| 31 |           | Visual Analog Scale: 0 = Inclination to join, 100 = Obligation to join.                                                                            |
| 32 | <b>9</b>  | In terms of possibly joining a national emergency preparedness against a pandemic, which of the following statements best describes your decision? |
| 33 |           | 1. I have volunteered.                                                                                                                             |
| 34 |           | 2. I want to volunteer.                                                                                                                            |
| 35 |           | 3. I am considering to volunteer.                                                                                                                  |
| 36 |           | 4. I will not volunteer.                                                                                                                           |
| 37 |           | 5. I do not know                                                                                                                                   |
| 38 |           |                                                                                                                                                    |
| 39 |           |                                                                                                                                                    |
| 40 |           |                                                                                                                                                    |
| 41 |           |                                                                                                                                                    |
| 42 |           |                                                                                                                                                    |
| 43 |           |                                                                                                                                                    |
| 44 |           |                                                                                                                                                    |
| 45 |           |                                                                                                                                                    |
| 46 |           |                                                                                                                                                    |
| 47 |           |                                                                                                                                                    |
| 48 |           |                                                                                                                                                    |
| 49 |           |                                                                                                                                                    |
| 50 |           |                                                                                                                                                    |
| 51 |           |                                                                                                                                                    |
| 52 |           |                                                                                                                                                    |
| 53 |           |                                                                                                                                                    |
| 54 |           |                                                                                                                                                    |
| 55 |           |                                                                                                                                                    |
| 56 |           |                                                                                                                                                    |
| 57 |           |                                                                                                                                                    |
| 58 |           |                                                                                                                                                    |
| 59 |           |                                                                                                                                                    |
| 60 |           |                                                                                                                                                    |

1  
2  
3  
4 Spørgeskema:  
5

- 6 - Alder  
7 - Hvilket køn identificerer du dig bedst med? (Vælg et: Mand, kvinde, andet)  
8 - Hvor mange fulde semestre har du gennemført?  
9 - Hvor mange fulde måneders klinisk erfaring ved siden af medicinstudiet har du på nuværende  
10 tidspunkt? (Dette både som FADL-sygeplejevikar (SPV), FADL-ventilatør og lægevikar)  
11 - Hvad er din kliniske erfaring baseret på? (Vælg flere: FADL-sygeplejevikar (SPV), FADL-ventilatør og  
12 lægevikar, andet)  
13  
14  
15  
16

17 I hvilken grad er følgende vigtigt for at du melder dig til at indgå i et nationalt pandemi beredskab?  
18

- 19 - Samfundssind (altruisme);  
20 Eksempel: jeg vil bidrage med det jeg kan, for at hjælpe mine medmennesker?  
21  
22  
23  
24 - Samfundspligt  
25 Eksempel: jeg bidrager fordi det forventes af mig  
26  
27  
28  
29 - Sammenhold  
30 Eksempel: Jeg er en del af det lægelige fællesskab  
31  
32  
33  
34 - Jobmulighed  
35 Eksempel: jeg har en chance for at få job i et fagligt nyt område  
36  
37  
38  
39 - Fysiske Rammer  
40 Eksempel: Jeg er sikker på, at der er taget forholdsregler, så jeg ikke bliver smittet under arbejdet  
41  
42  
43  
44 - Tryghed  
45 Eksempel: Jeg er sikker på at modtage tilstrækkelig supervision i trygge rammer  
46  
47  
48  
49 - Økonomi  
50 Eksempel: jeg er sikker på at få løn for arbejdet  
51  
52  
53  
54 - Læring  
55 Eksempel: at jeg får mulighed for at lære noget, jeg ellers ikke havde mulighed for  
56  
57  
58  
59 - Aktualitet  
60

1  
2  
3  
4 Eksempel: at jeg er en del af en historisk begivenhed  
5  
6  
7

- 8 - Kriseberedskab

9 Eksempel: Jeg får at vide, at der er brug for mig  
10  
11  
12

- 13 - Stolthed

14 Eksempel: at jeg vil føle en stolthed over at bidrage  
15  
16  
17

- 18 - Har du yderligere årsager, som motiverer dig, der ikke er spurgt ind til?  
19  
20  
21  
22  
23  
24  
25  
26  
27  
28  
29  
30  
31  
32  
33  
34  
35  
36  
37  
38  
39  
40  
41  
42  
43  
44  
45  
46  
47  
48  
49  
50  
51  
52  
53  
54  
55  
56  
57  
58  
59  
60

STROBE Statement—Checklist of items that should be included in reports of *cross-sectional studies*

|                              | Item No | Recommendation                                                                                                                                                                                                                                                                                                                                                                                                |
|------------------------------|---------|---------------------------------------------------------------------------------------------------------------------------------------------------------------------------------------------------------------------------------------------------------------------------------------------------------------------------------------------------------------------------------------------------------------|
| <b>Title and abstract</b>    | 1       | (a) Indicate the study's design with a commonly used term in the title or the abstract<br>(b) Provide in the abstract an informative and balanced summary of what was done and what was found                                                                                                                                                                                                                 |
| <b>Introduction</b>          |         |                                                                                                                                                                                                                                                                                                                                                                                                               |
| Background/rationale         | 2       | Explain the scientific background and rationale for the investigation being reported                                                                                                                                                                                                                                                                                                                          |
| Objectives                   | 3       | State specific objectives, including any prespecified hypotheses                                                                                                                                                                                                                                                                                                                                              |
| <b>Methods</b>               |         |                                                                                                                                                                                                                                                                                                                                                                                                               |
| Study design                 | 4       | Present key elements of study design early in the paper                                                                                                                                                                                                                                                                                                                                                       |
| Setting                      | 5       | Describe the setting, locations, and relevant dates, including periods of recruitment, exposure, follow-up, and data collection                                                                                                                                                                                                                                                                               |
| Participants                 | 6       | (a) Give the eligibility criteria, and the sources and methods of selection of participants                                                                                                                                                                                                                                                                                                                   |
| Variables                    | 7       | Clearly define all outcomes, exposures, predictors, potential confounders, and effect modifiers. Give diagnostic criteria, if applicable                                                                                                                                                                                                                                                                      |
| Data sources/<br>measurement | 8*      | For each variable of interest, give sources of data and details of methods of assessment (measurement). Describe comparability of assessment methods if there is more than one group                                                                                                                                                                                                                          |
| Bias                         | 9       | Describe any efforts to address potential sources of bias                                                                                                                                                                                                                                                                                                                                                     |
| Study size                   | 10      | Explain how the study size was arrived at                                                                                                                                                                                                                                                                                                                                                                     |
| Quantitative variables       | 11      | Explain how quantitative variables were handled in the analyses. If applicable, describe which groupings were chosen and why                                                                                                                                                                                                                                                                                  |
| Statistical methods          | 12      | (a) Describe all statistical methods, including those used to control for confounding<br>(b) Describe any methods used to examine subgroups and interactions<br>(c) Explain how missing data were addressed<br>(d) If applicable, describe analytical methods taking account of sampling strategy<br>(e) Describe any sensitivity analyses                                                                    |
| <b>Results</b>               |         |                                                                                                                                                                                                                                                                                                                                                                                                               |
| Participants                 | 13*     | (a) Report numbers of individuals at each stage of study—eg numbers potentially eligible, examined for eligibility, confirmed eligible, included in the study, completing follow-up, and analysed<br>(b) Give reasons for non-participation at each stage<br>(c) Consider use of a flow diagram                                                                                                               |
| Descriptive data             | 14*     | (a) Give characteristics of study participants (eg demographic, clinical, social) and information on exposures and potential confounders<br>(b) Indicate number of participants with missing data for each variable of interest                                                                                                                                                                               |
| Outcome data                 | 15*     | Report numbers of outcome events or summary measures                                                                                                                                                                                                                                                                                                                                                          |
| Main results                 | 16      | (a) Give unadjusted estimates and, if applicable, confounder-adjusted estimates and their precision (eg, 95% confidence interval). Make clear which confounders were adjusted for and why they were included<br>(b) Report category boundaries when continuous variables were categorized<br>(c) If relevant, consider translating estimates of relative risk into absolute risk for a meaningful time period |
| Other analyses               | 17      | Report other analyses done—eg analyses of subgroups and interactions, and sensitivity analyses                                                                                                                                                                                                                                                                                                                |

1  
2  
3  
4  
5  
6  
7  
8  
9  
10  
11  
12  
13  
14  
15  
16  
17  
18  
19  
20  
21  
22  
23  
24  
25  
26  
27  
28  
29  
30  
31  
32  
33  
34  
35  
36  
37  
38  
39  
40  
41  
42  
43  
44  
45  
46  
47  
48  
49  
50  
51  
52  
53  
54  
55  
56  
57  
58  
59  
60

| <b>Discussion</b>        |    |                                                                                                                                                                            |
|--------------------------|----|----------------------------------------------------------------------------------------------------------------------------------------------------------------------------|
| Key results              | 18 | Summarise key results with reference to study objectives                                                                                                                   |
| Limitations              | 19 | Discuss limitations of the study, taking into account sources of potential bias or imprecision. Discuss both direction and magnitude of any potential bias                 |
| Interpretation           | 20 | Give a cautious overall interpretation of results considering objectives, limitations, multiplicity of analyses, results from similar studies, and other relevant evidence |
| Generalisability         | 21 | Discuss the generalisability (external validity) of the study results                                                                                                      |
| <b>Other information</b> |    |                                                                                                                                                                            |
| Funding                  | 22 | Give the source of funding and the role of the funders for the present study and, if applicable, for the original study on which the present article is based              |

\*Give information separately for exposed and unexposed groups.

**Note:** An Explanation and Elaboration article discusses each checklist item and gives methodological background and published examples of transparent reporting. The STROBE checklist is best used in conjunction with this article (freely available on the Web sites of PLoS Medicine at <http://www.plosmedicine.org/>, Annals of Internal Medicine at <http://www.annals.org/>, and Epidemiology at <http://www.epidem.com/>). Information on the STROBE Initiative is available at [www.strobe-statement.org](http://www.strobe-statement.org).

# BMJ Open

## Support for mobilizing medical students to join the COVID-19 pandemic emergency healthcare workforce – a cross-sectional questionnaire survey

|                                 |                                                                                                                                                                                                                                                                                                                                                                                                                                                                                                 |
|---------------------------------|-------------------------------------------------------------------------------------------------------------------------------------------------------------------------------------------------------------------------------------------------------------------------------------------------------------------------------------------------------------------------------------------------------------------------------------------------------------------------------------------------|
| Journal:                        | <i>BMJ Open</i>                                                                                                                                                                                                                                                                                                                                                                                                                                                                                 |
| Manuscript ID                   | bmjopen-2020-039082.R1                                                                                                                                                                                                                                                                                                                                                                                                                                                                          |
| Article Type:                   | Original research                                                                                                                                                                                                                                                                                                                                                                                                                                                                               |
| Date Submitted by the Author:   | 01-Jul-2020                                                                                                                                                                                                                                                                                                                                                                                                                                                                                     |
| Complete List of Authors:       | Astorp, Mike; Aalborg University Hospital, Department of Geriatric Medicine<br>Sørensen, Gustav; Aalborg University Hospital, Department of Geriatric Medicine<br>Rasmussen, Sten; Aalborg University Hospital, Orthopaedic Surgery Research Unit<br>Emmersen, Jeppe; Aalborg University Faculty of Medicine<br>Erbs, Alexander; Aalborg University Faculty of Medicine<br>Andersen, Stig; Aalborg Universitet, Clinical Medicine; Aalborg University Hospital, Geriatric and Internal Medicine |
| <b>Primary Subject Heading</b>: | Medical education and training                                                                                                                                                                                                                                                                                                                                                                                                                                                                  |
| Secondary Subject Heading:      | Global health, Health informatics, Health policy, Medical management                                                                                                                                                                                                                                                                                                                                                                                                                            |
| Keywords:                       | MEDICAL EDUCATION & TRAINING, Health policy < HEALTH SERVICES ADMINISTRATION & MANAGEMENT, HEALTH SERVICES ADMINISTRATION & MANAGEMENT                                                                                                                                                                                                                                                                                                                                                          |
|                                 |                                                                                                                                                                                                                                                                                                                                                                                                                                                                                                 |

SCHOLARONE™  
Manuscripts

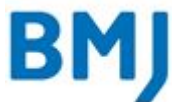

I, the Submitting Author has the right to grant and does grant on behalf of all authors of the Work (as defined in the below author licence), an exclusive licence and/or a non-exclusive licence for contributions from authors who are: i) UK Crown employees; ii) where BMJ has agreed a CC-BY licence shall apply, and/or iii) in accordance with the terms applicable for US Federal Government officers or employees acting as part of their official duties; on a worldwide, perpetual, irrevocable, royalty-free basis to BMJ Publishing Group Ltd ("BMJ") its licensees and where the relevant Journal is co-owned by BMJ to the co-owners of the Journal, to publish the Work in this journal and any other BMJ products and to exploit all rights, as set out in our [licence](#).

The Submitting Author accepts and understands that any supply made under these terms is made by BMJ to the Submitting Author unless you are acting as an employee on behalf of your employer or a postgraduate student of an affiliated institution which is paying any applicable article publishing charge ("APC") for Open Access articles. Where the Submitting Author wishes to make the Work available on an Open Access basis (and intends to pay the relevant APC), the terms of reuse of such Open Access shall be governed by a Creative Commons licence – details of these licences and which [Creative Commons](#) licence will apply to this Work are set out in our licence referred to above.

Other than as permitted in any relevant BMJ Author's Self Archiving Policies, I confirm this Work has not been accepted for publication elsewhere, is not being considered for publication elsewhere and does not duplicate material already published. I confirm all authors consent to publication of this Work and authorise the granting of this licence.

1  
2  
3  
4  
5  
6  
7  
8  
9  
10  
11  
12  
13  
14  
15  
16  
17  
18  
19  
20  
21  
22  
23  
24  
25  
26  
27  
28  
29  
30  
31  
32

## Support for mobilizing medical students to join the COVID-19 pandemic emergency healthcare workforce – a cross-sectional questionnaire survey

13  
14  
15  
16  
17  
18  
19  
20  
21  
22  
23  
24  
25  
26  
27  
28  
29  
30  
31  
32

**Mike S Astorp<sup>1,2</sup> (0000-0003-4062-6027), Gustav V B Sørensen<sup>1,2</sup> (0000-0002-7944-9913), Sten Rasmussen<sup>2,3</sup> (0000-0002-8664-352X), Jeppe Emmersen<sup>4</sup> (0000-0001-6244-1280), Alexander W Erbs<sup>4</sup> (0000-0003-3651-1112), Stig Andersen<sup>1,2</sup> (0000-0003-3632-5213).**

21  
22  
23  
24  
25  
26  
27  
28  
29  
30  
31  
32

1 - Department of Geriatric Medicine, Aalborg University Hospital, 9000 Aalborg, Denmark

2 - Department of Clinical Medicine, Aalborg University, 9000 Aalborg, Denmark

3 - Department of Orthopaedic Surgery, Aalborg University Hospital, 9000 Aalborg, Denmark

4 - Faculty of Medicine, Aalborg University, Niels Jernes Vej 10, 9000 Aalborg, Denmark

33  
34  
35  
36  
37  
38  
39  
40  
41  
42  
43  
44  
45  
46  
47  
48  
49  
50  
51  
52  
53  
54  
55  
56  
57  
58  
59  
60

### Correspondence to:

Mike S Astorp

e-mail: [m.astorp@rn.dk](mailto:m.astorp@rn.dk)

Department of Clinical Medicine

Faculty of Health, Aalborg University

Sonder Skovvej 15

9000 Aalborg

Denmark



1  
2  
3  
4  
5  
6  
7  
8  
9  
10  
11  
12  
13  
14  
15  
16  
17  
18  
19  
20  
21  
22  
23  
24  
25  
26  
27  
28  
29  
30  
31  
32  
33  
34  
35  
36  
37  
38  
39  
40  
41  
42  
43  
44  
45  
46  
47  
48  
49  
50  
51  
52  
53  
54  
55  
56  
57  
58  
59  
60

## Abstract:

**Objective:** To identify what motivates medical students to join a pandemic emergency healthcare workforce

**Design:** Cross-sectional.

**Setting:** Aalborg University, Denmark.

**Participants:** All medical students.

**Main outcome measures:** Motivational points as perceived by the students to be important. Demographic characteristics and 11 motivational domains scored on a Visual Analog Scale from 0 (low) to 100 (high) responding to the question: *“to what degree are the following statements important for you to join a national emergency preparedness workforce?”*. The questionnaire was developed by an expert panel in a process of 4 iterations.

### Results:

A total of 486 students of 688 (70.6%) completed the survey within 7 days in March 2020. 80% had decided to join the pandemic emergency healthcare workforce. Ranked median scores for motivational statements in each domain were: care, 100; learn, 90; pride, 83; team, 77; needed, 75; safety, 75; supervision, 75; job, 73; duty, 66; salary, 62; historic, 50. Supervision ( $p<0.001$ ), salary ( $p<0.001$ ), and duty ( $p=0.001$ ) were given increasing priority with advancing study years. Interestingly, students added that support by the university, and clarification study plans were priorities.

**Conclusions:** Results guide decisionmakers and colleagues on how to motivate or reinforce medical students in joining the pandemic emergency healthcare workforce. Importantly, students emphasised protection for themselves.

## Article summary:

### Strengths and limitations of this study:

- Participation rate was supported by the COVID-19 pandemic situation in March 2020
- All medical students at Aalborg University were invited
- The questionnaire mainly addresses positive motivational points for joining the pandemic healthcare workforce rather than reflections about possible problems associated with the recruitment.
- Data are from a PBL-university in a Scandinavian context and results may not be applicable to medical students in different contexts
- Student's characteristics did not differ between responders and non-responders

## Introduction

In December 2019, a new virus emerged in Wuhan city, the capital of Hubei province in China: the severe acute respiratory syndrome coronavirus 2 (SARS-CoV-2), previously known as 2019-nCoV.<sup>1</sup> The virus spreads rapidly, and mortality is a concern as death counts are climbing world-wide.<sup>2</sup> On the 11<sup>th</sup> of March 2020, the Director-General of the World Health Organization declared the outbreak of SARS-CoV-2 a pandemic.<sup>2</sup>

Turning to Europe, the impact of SARS-CoV-2 is currently seen in Italy with an immediate increase in intensive care unit admissions and fatalities have stunned the country.<sup>3</sup> Mid-February 2020, the alarm for an unknown presence of SARS-COV-2 in the Italian general population was set-off. Here, a patient tested positive for SARS-COV-2 and admitted to intensive care in Lodi, Lombardy, Italy. During the following 24 hours, an additional 35 cases were admitted without transmission from the first case. Thus, Italy sets the scene through a case-scenario for what is to come for healthcare systems across the world, with a high risk of these being pushed beyond capacities. Thus, promptly preparing health services to deal with such a scenario is crucial.

It is critical to be aware that healthcare staff is a finite resource that is likely to become depleted during a pandemic as a result of illness.<sup>4</sup> Further, one in four doctors and final-year medical students may abandon work during a pandemic to protect their families and themselves<sup>5</sup>. The lack of healthcare workers has earlier been described during both the influenza pandemic of 1918 and the polio epidemic in 1952.<sup>6,7</sup> Here, medical students were key contributors to the pandemic emergency healthcare workforce and ensured vital care for patients. A Belgian study conducted in 2009 suggested that more than 80% of medical students would contribute to care for pandemic patients.<sup>8</sup>

A recruitment strategy focusing on medical students as contributors could offer a solution to a healthcare workforce depletion during the current COVID-19 pandemic. Hence, it is important to identify what motivates medical students to join a pandemic emergency healthcare workforce. This led us to conduct a survey among all medical students at Aalborg University, Aalborg, Denmark, on what motivates them to join the pandemic emergency healthcare workforce, as the pandemic was in its early phase.

## Methods

This paper is reported according to the Strengthening the Reporting of Observational Studies in Epidemiology (STROBE) guideline.<sup>9</sup>

### Study design and setting

We conducted a cross-sectional study using a survey questionnaire distributed at one point in time. The questionnaire was distributed on the 16<sup>th</sup> of March 2020 to all medical students at Aalborg University through individual institutional e-mail addresses. Data collection closed on the 23<sup>rd</sup> of March 2020.

### Participants

We invited all medical students enrolled at Aalborg University, Aalborg, Denmark, at the time the questionnaire was distributed (n = 688). No exclusion criteria were applied. Admission to medical schools in Denmark rely on grades, medical education is free of charge, and it takes six years to become a medical doctor. At the medical school of Aalborg University, the guiding teaching principle is problem-based learning, and years four to six comprise learning in a clinical environment qualifying students to work as locum physicians when having completed the fourth year. Thus, a 4<sup>th</sup>-year medical student locum physician does supervised admissions and ward rounds with the attention of qualified doctors reviewing patients and notes.

The total number of medical students at Aalborg University increases by year groups as the medical education at Aalborg University expanded from an initial 35 graduating students in 2016 to an annual admission of 179 students from 2018 onwards.

The study did not involve patients.

### Variables

*Development of the research questionnaire*

1  
2  
3  
4 The questionnaire was constructed in a four-phase process. First, an expert panel was established comprising  
5 a medical student (AE) to ensure medical students' priorities, experience and preferences, a junior doctor  
6 (MSA), and a senior consultant with a focus on education (SA). This group performed a brainstorm on all likely  
7 relevant motivational domains that could motivate medical students to join the pandemic emergency  
8 healthcare workforce. Second, a selection of key domains that were considered to influence medical  
9 students' motivation on volunteering for the pandemic emergency healthcare workforce during the COVID-  
10 19 crisis was performed. Third, the questionnaire was constructed, and a final iteration focused on adding  
11 missed domains by two experts on education (JE, SR). Fourth, a process of method optimisation was  
12 conducted to enhance the quality of the final questionnaire (GVBS, SA).  
13  
14  
15  
16  
17  
18  
19  
20  
21  
22  
23  
24

#### 25 *Content of the questionnaire*

26  
27  
28 The questionnaire is available in the appendix in an English translation as well as the original version in  
29 Danish. It includes questions on both demographics and motivational factors. For demographics, we recorded  
30 gender, age, number of semesters completed, and clinical experience obtained aside from clinical  
31 placements planned in the curriculum. For questions on motivational factors, we presented 11 motivational  
32 statements following an overarching question: "To what degree are the following statements important for  
33 you to join a national emergency preparedness workforce?" (translation from Danish: "I hvilken grad er  
34 følgende udsagn vigtige for, at du melder dig til at indgå i et nationalt pandemiberedskab?"). The motivational  
35 statements included revolved around the care for fellow human beings, learning opportunities, pride in  
36 contributing, being part of the doctoral fellowship, being needed, own safety, supervision, job opportunities,  
37 duty, salary, and participation in a historic event. Students were asked to score each statement on a Visual  
38 Analog Scale from 0 to 100 with 0 being to a very low extent and 100 being to a very great extent. The  
39 questionnaire concluded by asking their status regarding joining the pandemic emergency healthcare  
40 workforce with reply options being: "Have joined", "Want to join", "Consider joining", "Have decided not to  
41 join", or "Undecided as to whether to join or not".  
42  
43  
44  
45  
46  
47  
48  
49  
50  
51  
52  
53  
54  
55  
56  
57  
58  
59  
60

## Data management

Data were collected and managed using Research Electronic Data Capture (REDCap) electronic data capture tools hosted at Region Nordjylland.<sup>10,11</sup> REDCap is a secure, web-based software platform designed to support data capture for research studies, providing 1) an intuitive interface for validated data capture; 2) audit trails for tracking data manipulation and export procedures; 3) automated export procedures for seamless data downloads to common statistical packages, and 4) procedures for data integration and interoperability with external sources.

## Bias

Selection bias in our available population was avoided by distributing the questionnaire to all medical students. We strived to avoid non-response bias by using neutral wording and formulations.

## Statistical analysis

In Denmark, one semester is equal to a half year of education, and we merged semesters to report advancement in full study years completed. Age groups were constructed by 20 years and below, 21-25 years, 26-30 years, and 31 years or older. Years of clinical experience were calculated and students were grouped by below 1 year, 1-2 years, 2-3 years, and more than 3 years. For the question on motivational factors, we considered a score above 60 as high and above 80 as very high.

Variables were summarised using standard descriptive statistics. If normally distributed, continuous, and discrete, variables were summarised using means with standard deviations. If non-normally distributed medians with interquartile range were used. Normality of distributions were checked using QQ-plots and histograms. Categorical data were displayed using proportions. Comparisons were performed using Mann-Whitney for comparison of two groups, Kruskal-Wallis test for comparison of several groups, and chi-squared test for comparing proportions. A p-value less than 0.05 was considered statistically significant.

1  
2  
3  
4 Missing data accounted for 0.10% of demographic data and 0.36% of motivational statements. Therefore,  
5  
6 imputations were not performed, and observations with missing data were otherwise included in the  
7  
8 analyses.  
9

10  
11 The sample size was determined by the number of medical students enrolled at the bachelor and master  
12  
13 programs in medicine at Aalborg University, Aalborg, Denmark, during the study period. The statistical  
14  
15 software for the Social Sciences was used (IBM Corp. IBM SPSS Statistics for Windows, Version 13.0. NY: IBM  
16  
17 Corp.)  
18  
19

#### 20 21 **Patient and public involvement:** 22

23  
24 Patient and public involvement were hampered by the restrictions on unnecessary assemblies. Combined  
25  
26 with the urgency of this study the public and patient involvement was limited to the inclusion of a  
27  
28 representative medical student.  
29

30  
31 Patient and public involvement was incorporated by giving AE a distinct role during the problem-based  
32  
33 learning process.<sup>12</sup> AE contributed to the clarification of terms, had a separate time slot during brainstorming,  
34  
35 and making the scribe list. All views by AE on each issue were recorded and considered. A similar emphasis  
36  
37 was put on the student contribution put forward by AE during the discussion of problems and possible  
38  
39 explanations drawn on the student's knowledge and identification of areas of incomplete knowledge during  
40  
41 the review step.<sup>12</sup> This contributed to the selection of domains, and the construction of the questionnaire.  
42  
43 AE added to the consideration of the burden and time required to participate in the survey. AE is a 5<sup>th</sup>-year  
44  
45 medical student representing medical students by being the head of the Danish Medical Students  
46  
47 organization for Anesthesiology and Traumatology, a member of Medical Students Council, a member of  
48  
49 Aalborg University Hospital's steering committee on education of medical students to participate in the  
50  
51 pandemic as well as a locum physician at the Department of Orthopaedic Surgery at Aalborg University  
52  
53 Hospital. The experience along with contacts among fellow students and organisations will contribute to the  
54  
55 dissemination of the survey results among students regionally and nationally.  
56  
57  
58  
59  
60

## Results

### *Characteristics of participants*

The participation rate was 70.6% with 486 out of 688 medical students responding to the survey invitation, and with 415 (60.3%) responding within 48 hours. Table 1 lists the characteristics of the medical students participating. The sample did not differ from the available population of medical students at Aalborg University in terms of gender (male/female, 32.3/67.7%; chi-squared 0.16,  $p > 0.1$ ), and age (median (IQR): 23 (3) years in the sample,  $p > 0.1$ ). The median (IQR) of clinical experience was 3 (12) months. All but 35.2% had previous clinical experience. Being a substitute assistant nurse was the main non-curricular clinical occupation accounting for 35.8% of all medical students. Secondly, being a locum physician was seen in 13.6% of all medical students and 27.5% of those in the final 3 clinical years.

### *Motivation scores*

Four out of five stated that they had joined, or wanted to join the pandemic emergency healthcare workforce, while 18.4% (89) were undecided (Table 1).

Table 2 lists the scores for each statement ranked by score. In general, the scores were high or very high with "care for fellow human beings", "learning opportunities", and "Pride in contributing" receiving the highest scores. "being part of the doctoral fellowship" and "being needed" receive a high score along with "own safety" and "supervision". "Participation in a historic event" and "salary" did not receive high scores.

### *Worries added by students*

Additional motivational factors mentioned by responding students were primarily related to study activities. The competition for time used for reading, uncertainty regarding the need for reading, changing of study plans, and the risk of being barred from exams due to absence from clinical placements were concerns raised. Encouragement from the university was important to some. Also, the risk of being infected was listed as a priority. To the other end, helping future colleagues was emphasized along with the quality and kind of work



1  
2  
3  
4 they would participate in. Finally, it was stated that the questions should have been on what prevents medical  
5  
6 students from contributing rather than on what motives them to join.  
7

### 8 9 *Differences among students*

10  
11  
12 “supervision” was given increasing priority with advancing study years. Scores for “duty” rose after the early  
13  
14 study years. “salary” received low scores during the first 3 years, and was higher in medical students at the 3  
15  
16 final clinical years. Scores for “care for fellow humans” were higher by female students but scores were high  
17  
18 for students of all genders. “Salary” was given increasing priority with clinical experience ( $p < 0.001$ ).  
19

20  
21  
22 The eight who had replied “decided not to participate” in the pandemic emergency healthcare workforce  
23  
24 had markedly lower scores for “care for fellow humans” compared to those who replied “aimed to joined”  
25  
26 or “had joined” (median 77/100/100,  $p < 0.001$ ). The same accounted for “being part of the doctoral  
27  
28 fellowship” (65/75/80,  $p = 0.005$ ) and for “pride in contributing” (60/86/90,  $p < 0.001$ ). “safety” scored slightly  
29  
30 different (97/75/75,  $p = 0.056$ ).  
31  
32  
33  
34  
35

## 36 **Discussion**

### 37 **Key results**

38  
39  
40 Motivation for joining a pandemic emergency healthcare workforce was reported by medical students to be  
41  
42 an urge to help fellow human beings, a learning opportunity and taking pride in contributing. In addition,  
43  
44 motivational factors given priority were joining the doctoral fellowship, their help being needed, their own  
45  
46 safety and guidance at work. The majority of medical students were willing to participate in the pandemic  
47  
48 emergency healthcare workforce, but they had concerns that should be and can be addressed when  
49  
50 acknowledged. Hospitals and senior colleagues can accommodate the request for supervision in the clinical  
51  
52 work using available tools and thereby support unique learning opportunities for medical students.<sup>13</sup> Such  
53  
54 collaborative efforts support medical students teaming up with the medical fellowship to further strengthen  
55  
56  
57  
58  
59  
60

1  
2  
3  
4 the push for participation and learning.<sup>14</sup> In addition, this can be a benefit to the students' self-satisfaction  
5  
6 and appreciation of their efforts.  
7

8  
9 Importantly, medical students put forward a request for protection of themselves when participating in a  
10  
11 pandemic emergency healthcare workforce. This concern should be addressed by hospitals during by eg.  
12  
13 training sessions and theoretical prequalification before starting clinical work. The safety should also be  
14  
15 addressed by senior colleagues during clinical work. There was limited emphasis on salary and academic  
16  
17 resume, but these factors still gained a medium score and may be addressed during recruitment.  
18  
19

20  
21 Factors linked to study activity should be addressed. The university should settle uncertainty concerning  
22  
23 study plans and exams to provide clear guidance for students. Finally, students listed that encouragement by  
24  
25 the university to participate in a pandemic emergency healthcare workforce could be an incentive.  
26  
27

## 28 **Strengths and Limitations**

29  
30  
31 A strength of this survey was the timing. The COVID-19 pandemic was announced at the time of sending out  
32  
33 survey invitation, and death rates were high in China and rapidly rising in Southern Europe while the link was  
34  
35 open. This emphasized the severity of the situation and may have encouraged medical students to consider  
36  
37 whether to participate in the pandemic emergency workforce. Also, this may have supported the high  
38  
39 response rate of 71%. Age, gender, and distribution between study years were comparable between  
40  
41 responders and non-responders. It may be speculated that non-responders were undecided students. The  
42  
43 scores of 18.4% of responders undecided on whether to join the pandemic emergency healthcare workforce,  
44  
45 were just under median scores. Adding such scores is unlikely to alter the conclusions.  
46  
47

48  
49 A limitation of the study is that the constructed questionnaire primarily addresses positive motivational  
50  
51 points as to joining the pandemic healthcare workforce and not what is impeding to the students. This could  
52  
53 have further have helped to guide clinicians and administrators contributing to a further elaborate list of  
54  
55 items and priorities to take into account. A note must be taken that the survey was performed in Denmark,  
56  
57 which has tax-funded healthcare and free education. This could influence the motivation of the students. The  
58  
59  
60

1  
2  
3  
4 limitations regarding the involvement of the patient and public involvement may have hindered uncovering  
5  
6 further relevant aspects and resulted in a limited representation of relevant groups.  
7  
8

### 9 **Interpretation**

10  
11 An earlier study reported that more than 80% of medical students in the US would volunteer to participate  
12  
13 in the healthcare workforce during a pandemic.<sup>4</sup> Our numbers were similar for a tax-funded health care  
14  
15 system in Europe and they are in line with a Belgian study reporting that 80% of final year medical students  
16  
17 would volunteer during a pandemic.<sup>8</sup> Also, a concern for educational interruptions with an ongoing pandemic  
18  
19 crisis was similar between our medical students in Europe and a group in North America.<sup>15</sup> Motivation of  
20  
21 healthcare workers in general during a pandemic parallel some of our findings among medical students,  
22  
23 including safety, being part of a team, and feeling useful.<sup>16,17</sup>  
24  
25  
26

### 27 **Generalisability**

28  
29 The generalisability is affected in a few ways. First, the survey was conducted at a university using problem  
30  
31 based learning and a spiral curriculum with the students embedded in the clinical environment for the final  
32  
33 three years.<sup>18</sup> Second, the education being for free may also influence motivation. However, medical students  
34  
35 responded similarly in two domains to those in North America suggesting similar responses despite these  
36  
37 differences.  
38  
39

### 40 **Clinical implications**

41  
42 The most noticeable implication is that medical students provide a resource eager to contribute to patient  
43  
44 treatment and care during a pandemic emergency if few relevant needs are met as detailed in this report  
45  
46 and that this can easily be accommodated. In the case of an evolving pandemic, occurrence of local outbreaks  
47  
48 and secondary waves of infections, access to this resource will become important for decision- and  
49  
50 policymakers, both for the sake of patients and healthcare personal.  
51  
52  
53

### 54 **Future research**

55  
56  
57  
58  
59  
60

1  
2  
3  
4 Future studies could evaluate if priorities changed with the crises at a distance and if priorities vary between  
5  
6 medical students at universities with different curricula and pedagogical approaches to learning. Also, they  
7  
8 should explore factors impeding medical student response and their concern regarding protection.  
9

10  
11 Medical students may be motivated to contribute to the healthcare workforce if learning during a pandemic  
12  
13 is relevant to learning objectives. Studies to explore such opportunities are warranted.  
14

## 15 **Conclusion**

16  
17 The present study provides a list of items and priorities to inspire and guide clinicians and administrators at  
18  
19 both hospitals and universities to support recruiting medical students for a pandemic emergency healthcare  
20  
21 workforce. Importantly, students emphasised safety for themselves. Hands-on recommendations include  
22  
23 focussing on learning opportunity, supervision, acceptance of educational interruptions by, and support  
24  
25 from, university.  
26  
27  
28  
29  
30  
31  
32  
33  
34  
35  
36  
37  
38  
39  
40  
41  
42  
43  
44  
45  
46  
47  
48  
49  
50  
51  
52  
53  
54  
55  
56  
57  
58  
59  
60

1  
2  
3  
4  
5  
6  
7  
8  
9  
10  
11  
12  
13  
14  
15  
16  
17  
18  
19  
20  
21  
22  
23  
24  
25  
26  
27  
28  
29  
30  
31  
32  
33  
34  
35  
36  
37  
38  
39  
40  
41  
42  
43  
44  
45  
46  
47  
48  
49  
50  
51  
52  
53  
54  
55  
56  
57  
58  
59  
60

**Transparency statement:**

The lead author (the manuscript's guarantor) affirms that the manuscript is an honest, accurate, and transparent account of the study being reported; that no important aspects of the study have been omitted; and that any discrepancies from the study as originally planned (and, if relevant, registered) have been explained.

**Contributors:**

Conceptualisation: MSA, SR, JE, AE and SA. Formal analysis: MSA and SA. Methodology: MSA, AE, SA, SR, JE and GVBS. Project administration: MSA and SA. Resources: SA, GVBS and JE. Software: GVBS. Supervision: SA and GVBS. Validation: JE. Visualisation: MSA. Writing – Original Draft Preparation: MSA. Writing – Review and editing: MSA, SA, GVBS, AE, SR, JE. The corresponding author attests that all listed authors meet authorship criteria and that no others meeting the criteria have been omitted. Mike S Astorp is the guarantor of the study.

**Funding:**

This research received no funding support.

**Competing interests:**

All authors have completed the ICMJE uniform disclosure form at [www.icmje.org/coi\\_disclosure.pdf](http://www.icmje.org/coi_disclosure.pdf) and declare: no support from any organisation for the submitted work; no financial relationships with any organisations that might have an interest in the submitted work in the previous three years; no other relationships or activities that could appear to have influenced the submitted work.

**Ethics:**

Written informed consent was obtained from all students by agreeing to answer the questionnaire. Due to the study being a survey, ethical approval was not required according to the Danish Act on the Scientific

1  
2  
3  
4 Ethical Committee System (Act no. 593, section 14, subsection 2). Approval was obtained from the Danish  
5  
6 Data Protection Agency (record number 2020-030).  
7  
8

9  
10 **Data sharing statement:**

11  
12 The questionnaire will be shared in the appendix both in the original (Danish) and in a translation to English.  
13  
14 Extra data is available by emailing the corresponding author while individual participant data cannot be  
15  
16 shared for the reason of confidentiality.  
17  
18

19  
20 **Copyright and license for publication:**

21  
22 The Corresponding Author has the right to grant on behalf of all authors and does grant on behalf of all  
23  
24 authors, a worldwide licence to the Publishers and its licensees in perpetuity, in all forms, formats, and media  
25  
26 (whether known now or created in the future), to i) publish, reproduce, distribute, display and store the  
27  
28 Contribution, ii) translate the Contribution into other languages, create adaptations, reprints, include within  
29  
30 collections and create summaries, extracts and/or, abstracts of the Contribution, iii) create any other  
31  
32 derivative work(s) based on the Contribution, iv) to exploit all subsidiary rights in the Contribution, v) the  
33  
34 inclusion of electronic links from the Contribution to third party material where-ever it may be located; and,  
35  
36 vi) licence any third party to do any or all of the above.  
37  
38  
39  
40

41 **Dissemination to participants and related patient and public communities:**

42  
43 Results will be distributed to Danish government officials with responsibility for providing national  
44  
45 healthcare, Aalborg University, The North Denmark Region, all medical students at Aalborg University, the  
46  
47 Organization for Danish medical students (FADL), the organization for medical students at Aalborg University.  
48  
49  
50  
51  
52  
53  
54  
55  
56  
57  
58  
59  
60

## References

1. Zhou F, Yu T, Du R, et al. Clinical course and risk factors for mortality of adult inpatients with COVID-19 in Wuhan, China: a retrospective cohort study. *Lancet*. 2020;6736(20):1-9. doi:10.1016/S0140-6736(20)30566-3
2. Kinross P, Suetens C, Gomes Dias J, et al. Rapidly increasing cumulative incidence of coronavirus disease (COVID-19) in the European Union/European Economic Area and the United Kingdom, 1 January to 15 March 2020. *Eurosurveillance*. March 2020. doi:10.2807/1560-7917.ES.2020.25.11.2000285
3. Grasselli G, Pesenti A, Cecconi M. Critical Care Utilization for the COVID-19 Outbreak in Lombardy, Italy. *JAMA*. March 2020. doi:10.1001/jama.2020.4031
4. Herman B, Rosychuk RJ, Bailey T, Lake R, Yonge O, Marrie TJ. Medical students and pandemic influenza. *Emerg Infect Dis*. 2007;13(11):1781-1783. doi:10.3201/eid1311.070279
5. Ehrenstein BP, Hanses F, Salzberger B. Influenza pandemic and professional duty: family or patients first? A survey of hospital employees. *BMC Public Health*. 2006;6(1):311. doi:10.1186/1471-2458-6-311
6. Starr I. Influenza in 1918: Recollections of the Epidemic in Philadelphia. *Ann Intern Med*. 2006;145(2):138. doi:10.7326/0003-4819-145-2-200607180-00132
7. Astrup P, Gotzche H, Neukirch F. Laboratory Investigations during Treatment of Patients with Poliomyelitis and Respiratory Paralysis. *BMJ*. 1954;1(4865):780-786. doi:10.1136/bmj.1.4865.780
8. Mortelmans LJM, Cauwer HG De, Dyck E Van, Monballyu P, Giel R Van, Turnhout E Van. Are Belgian Senior Medical Students Ready to Deliver Basic Medical Care in Case of a H5N1 Pandemic? *Prehosp Disaster Med*. 2009;24(5):438-442. doi:10.1017/S1049023X00007287
9. Vandembroucke JP, Von Elm E, Altman DG, et al. Strengthening the Reporting of Observational Studies in Epidemiology (STROBE): Explanation and elaboration. *PLoS Med*. 2007;4(10):1628-1654. doi:10.1371/journal.pmed.0040297
10. Harris PA, Taylor R, Minor BL, et al. The REDCap consortium: Building an international community of software platform partners. *J Biomed Inform*. 2019;95:103208. doi:10.1016/j.jbi.2019.103208
11. Harris PA, Taylor R, Thielke R, Payne J, Gonzalez N, Conde JG. Research electronic data capture (REDCap)—A metadata-driven methodology and workflow process for providing translational research informatics support. *J Biomed Inform*. 2009;42(2):377-381. doi:10.1016/j.jbi.2008.08.010
12. Wood DF. Problem based learning What is problem based learning ? *Bmj*. 2003;326(February):328-330. doi:10.1136/bmj.326.7384.328
13. Spencer J. ABC of learning and teaching in medicine: Learning and teaching in the clinical environment. *Br Med J*. 2003;326(7389):591-594. doi:10.1136/bmj.326.7389.591
14. Dornan T, Medical M. Supporting medical students' workplace learning : *Clin Teach*. 2009;6:167-171.
15. Clark J. Fear of SARS thwarts medical education in Toronto. *BMJ*. 2003;326(7393):784c - 784. doi:10.1136/bmj.326.7393.784/c
16. Anantham D, McHugh W, O'Neill S, Forrow L. Clinical review: Influenza pandemic - Physicians and their obligations. *Crit Care*. 2008;12(3):2-6. doi:10.1186/cc6918

- 1  
2  
3  
4 17. Ives J, Greenfield S, Parry JM, et al. Healthcare workers' attitudes to working during pandemic  
5 influenza: a qualitative study. *BMC Public Health*. 2009;9(1):56. doi:10.1186/1471-2458-9-56  
6  
7 18. Andersen S, Stentoft D, Emmersen J, Rasmussen S, Birkelund S, Nøhr S. Contention over  
8 undergraduate medical curriculum content. *Int J Med Educ*. 2019;10:230-231.  
9 doi:10.5116/ijme.5de7.7516  
10  
11  
12  
13  
14  
15  
16  
17  
18  
19  
20  
21  
22  
23  
24  
25  
26  
27  
28  
29  
30  
31  
32  
33  
34  
35  
36  
37  
38  
39  
40  
41  
42  
43  
44  
45  
46  
47  
48  
49  
50  
51  
52  
53  
54  
55  
56  
57  
58  
59  
60

For peer review only



Table 1  
Characteristics of medical students participating in the survey

|                                           |                   | %    | N   |                |
|-------------------------------------------|-------------------|------|-----|----------------|
| <b>Age groups</b>                         |                   |      |     |                |
|                                           | up to 20 y        | 9.1  | 44  |                |
|                                           | 21-25 y           | 71,6 | 348 |                |
|                                           | 26-30 y           | 15,2 | 74  |                |
|                                           | 31+ y             | 4.1  | 20  |                |
|                                           | total             | 100  | 486 |                |
| <b>Gender*</b>                            |                   |      |     |                |
|                                           | Male              | 31.1 | 151 |                |
|                                           | Female            | 68.5 | 332 |                |
|                                           | Other             | 0.4  | 2   |                |
|                                           | total             | 100  | 485 |                |
| <b>Study year</b>                         |                   |      |     |                |
|                                           | 1.                | 23.7 | 115 | total**<br>173 |
|                                           | 2.                | 17.7 | 86  | 149            |
|                                           | 3.                | 21.4 | 104 | 126            |
|                                           | 4.                | 16.5 | 80  | 108            |
|                                           | 5.                | 15.0 | 73  | 83             |
|                                           | 6.                | 5.8  | 28  | 49             |
|                                           | total             | 100  | 486 | 688            |
| <b>Clinical experience (years)*</b>       |                   |      |     |                |
|                                           | < 1 y             | 76.0 | 369 |                |
|                                           | 1-2 y             | 12.2 | 59  |                |
|                                           | 2-3 y             | 6.0  | 29  |                |
|                                           | 3+ y              | 5.8  | 28  |                |
|                                           | total             | 100  | 485 |                |
| <b>Joins pandemic emergency workforce</b> |                   |      |     |                |
|                                           | Has joined        | 63.4 | 308 |                |
|                                           | Aims to join      | 16.7 | 81  |                |
|                                           | Considers to join | 16.5 | 80  |                |
|                                           | Don't know        | 1.9  | 9   |                |
|                                           | Won't join        | 1.6  | 8   |                |
|                                           | total             | 100  | 486 |                |
| <b>Among decided</b>                      |                   |      |     |                |
|                                           | yes               | 98.0 | 389 |                |
|                                           | no                | 2.0  | 8   |                |
|                                           | total             | 100  | 397 |                |

\* missing data: 1 gender; 1 clinical experience

\*\* the number of medical students enrolled by each study year

Table 2

Scores for joining the pandemic emergency healthcare force as stated by medical students in reply to the question (the students were not shown the domains presented in this table):

"To what degree are the following statements important for you to join a national emergency preparedness workforce for a pandemic?". Scores were on a scale from 0 to 100.

| Domain      | Question asked                                                              | Median | 25; 75 percentiles | Mean | P; gender / study year |
|-------------|-----------------------------------------------------------------------------|--------|--------------------|------|------------------------|
| Care        |                                                                             |        |                    | 92.8 |                        |
|             | I would like to help my fellow human beings                                 | 100    | 88; 100            |      | 0.001 / 0.068          |
| Learn       |                                                                             |        |                    | 84.7 |                        |
|             | I will be provided an opportunity to learn something                        | 90     | 75; 100            |      | ns / ns                |
| Pride       |                                                                             |        |                    | 79.0 |                        |
|             | I will take pride in contributing                                           | 83     | 66; 100            |      | ns / ns                |
| Team        |                                                                             |        |                    | 73.3 |                        |
|             | I become a part of the doctoral fellowship                                  | 77     | 60; 100            |      | ns / ns                |
| Needed      |                                                                             |        |                    | 73.4 |                        |
|             | I am informed that I am needed                                              | 75     | 60; 94             |      | ns / 0.053             |
| safety      |                                                                             |        |                    | 71.7 |                        |
|             | Precautions have been taken to prevent me from getting infected during work | 75     | 50;99              |      | 0.024 / 0.085          |
| supervision |                                                                             |        |                    | 72.5 |                        |
|             | I will receive supervision in my work                                       | 75     | 55;93              |      | 0.014 / <0.001         |
| Job         |                                                                             |        |                    | 69.4 |                        |
|             | I develop my professional job profile                                       | 73     | 51; 93             |      | 0.030 / 0.003          |
| Duty        |                                                                             |        |                    | 60.1 |                        |
|             | It is expected from me                                                      | 66     | 47; 80             |      | ns / 0.001             |
| Salary      |                                                                             |        |                    | 60.9 |                        |
|             | I get paid for my work                                                      | 62     | 50; 84             |      | ns / <0.001            |
| History     |                                                                             |        |                    | 50.9 |                        |
|             | I become part of a historic event                                           | 50     | 21; 76             |      | 0.060 / ns             |

ns: p >0.1 in Mann-Whitney and Kruskal-Wallis test for gender and study year respectively  
15 responders had missing data comprising 0.3% of all data. Imputations were omitted.

## Questionnaire English:

| #  | Question:                                                                                                                                                                                                                                                       | Response:                                                                                                                                                                                                                                                                                                                                                 |
|----|-----------------------------------------------------------------------------------------------------------------------------------------------------------------------------------------------------------------------------------------------------------------|-----------------------------------------------------------------------------------------------------------------------------------------------------------------------------------------------------------------------------------------------------------------------------------------------------------------------------------------------------------|
| 1  | Please provide your age in whole years.                                                                                                                                                                                                                         | Individual response in whole numbers.                                                                                                                                                                                                                                                                                                                     |
| 2  | Which gender do you identify yourself with the most?                                                                                                                                                                                                            | <ol style="list-style-type: none"> <li>1. Male.</li> <li>2. Female.</li> <li>3. Others.</li> </ol>                                                                                                                                                                                                                                                        |
| 3  | <p>How many semesters have you completed?</p> <p>This includes both semesters completed in the Bachelor and Masters programme in medicine.</p>                                                                                                                  | <ol style="list-style-type: none"> <li>1. 1 semester.</li> <li>2. 2 semesters.</li> <li>3. 3 semesters.</li> <li>4. 4 semesters.</li> <li>5. 5 semesters.</li> <li>6. 6 semesters.</li> <li>7. 7 semesters.</li> <li>8. 8 semesters.</li> <li>9. 9 semesters.</li> <li>10. 10 semesters.</li> <li>11. 11 semesters.</li> <li>12. 12 semesters.</li> </ol> |
| 4  | <p>Aside from your university studies, how many full months of clinical experience have you gained currently?</p> <p>This includes both experiences gained as a substitute assistant nurse, ventilator assistant, locum physician, phlebotomist, or others.</p> | Individual response in full months provided as a whole number in a textbox.                                                                                                                                                                                                                                                                               |
| 5  | What is your clinical experience based upon? (please select one or more of the following answers)                                                                                                                                                               | <ol style="list-style-type: none"> <li>1. Substitute assistant nurse</li> <li>2. Ventilator assistant</li> <li>3. Locum physician</li> <li>4. Phlebotomist</li> <li>5. Others.</li> <li>6. Not relevant</li> </ol>                                                                                                                                        |
| 5a | If you selected "Others" in Question 5, what are your clinical experiences based on?                                                                                                                                                                            | Individual text response.                                                                                                                                                                                                                                                                                                                                 |
| 6  | to what degree are the following statements important for you to join a national emergency preparedness workforce?                                                                                                                                              |                                                                                                                                                                                                                                                                                                                                                           |

|                                                                                                                                                                                                                                                                                                                                                             |                                                                                                                                                                                                                                                                                                                                                                                                                                                                                                                                                                                                                                                                                                                                                                                                                                                                                                                                                                                                                                                                                      |                                                                                                                                                                                                                                                                                                                                                                                                                                                                                                                                                                                                                                                                                                                                                                                                                                                                                                                                                                                                                                                                                                                                                                                         |
|-------------------------------------------------------------------------------------------------------------------------------------------------------------------------------------------------------------------------------------------------------------------------------------------------------------------------------------------------------------|--------------------------------------------------------------------------------------------------------------------------------------------------------------------------------------------------------------------------------------------------------------------------------------------------------------------------------------------------------------------------------------------------------------------------------------------------------------------------------------------------------------------------------------------------------------------------------------------------------------------------------------------------------------------------------------------------------------------------------------------------------------------------------------------------------------------------------------------------------------------------------------------------------------------------------------------------------------------------------------------------------------------------------------------------------------------------------------|-----------------------------------------------------------------------------------------------------------------------------------------------------------------------------------------------------------------------------------------------------------------------------------------------------------------------------------------------------------------------------------------------------------------------------------------------------------------------------------------------------------------------------------------------------------------------------------------------------------------------------------------------------------------------------------------------------------------------------------------------------------------------------------------------------------------------------------------------------------------------------------------------------------------------------------------------------------------------------------------------------------------------------------------------------------------------------------------------------------------------------------------------------------------------------------------|
| 1<br>2<br>3<br>4<br>5<br>6<br>7<br>8<br>9<br>10<br>11<br>12<br>13<br>14<br>15<br>16<br>17<br>18<br>19<br>20<br>21<br>22<br>23<br>24<br>25<br>26<br>27<br>28<br>29<br>30<br>31<br>32<br>33<br>34<br>35<br>36<br>37<br>38<br>39<br>40<br>41<br>42<br>43<br>44<br>45<br>46<br>47<br>48<br>49<br>50<br>51<br>52<br>53<br>54<br>55<br>56<br>57<br>58<br>59<br>60 | <p><b>6a</b> - I would like to help my fellow human beings</p> <p><b>6b</b> - It is expected from me</p> <p><b>6c</b> - I become a part of the doctoral fellowship</p> <p><b>6d</b> - I develop my professional job profile</p> <p><b>6e</b> - Precautions have been taken to prevent me from getting infected during work</p> <p><b>6f</b> - I will receive supervision in my work</p> <p><b>6g</b> - I get paid for my work.</p> <p><b>6h</b> - I will be provided an opportunity to learn something</p> <p><b>6i</b> - I become part of a historic event</p> <p><b>6j</b> - I am informed that I am needed</p> <p><b>6k</b> - I will take pride in contributing</p> <p><b>7</b> Do you have further causes for motivation that have not been addressed?</p> <p><b>8</b> In terms of joining a national emergency preparedness against a pandemic, how would you weigh inclination over obligation to join?</p> <p><b>9</b> In terms of possibly joining a national emergency preparedness against a pandemic, which of the following statements best describes your decision?</p> | <p>Visual Analog Scale: 0 = To a very low extent, 100 = To a very great extent</p> <p>Visual Analog Scale: 0 = To a very low extent, 100 = To a very great extent</p> <p>Visual Analog Scale: 0 = To a very low extent, 100 = To a very great extent</p> <p>Visual Analog Scale: 0 = To a very low extent, 100 = To a very great extent</p> <p>Visual Analog Scale: 0 = To a very low extent, 100 = To a very great extent</p> <p>Visual Analog Scale: 0 = To a very low extent, 100 = To a very great extent</p> <p>Visual Analog Scale: 0 = To a very low extent, 100 = To a very great extent</p> <p>Visual Analog Scale: 0 = To a very low extent, 100 = To a very great extent</p> <p>Visual Analog Scale: 0 = To a very low extent, 100 = To a very great extent</p> <p>Visual Analog Scale: 0 = To a very low extent, 100 = To a very great extent</p> <p>Visual Analog Scale: 0 = To a very low extent, 100 = To a very great extent</p> <p>Individual response.</p> <p>Visual Analog Scale: 0 = Inclination to join, 100 = Obligation to join.</p> <p>1. Have joined.<br/>2. I want to join.<br/>3. I am considering to join.<br/>4. I will not join.<br/>5. I do not know</p> |
|-------------------------------------------------------------------------------------------------------------------------------------------------------------------------------------------------------------------------------------------------------------------------------------------------------------------------------------------------------------|--------------------------------------------------------------------------------------------------------------------------------------------------------------------------------------------------------------------------------------------------------------------------------------------------------------------------------------------------------------------------------------------------------------------------------------------------------------------------------------------------------------------------------------------------------------------------------------------------------------------------------------------------------------------------------------------------------------------------------------------------------------------------------------------------------------------------------------------------------------------------------------------------------------------------------------------------------------------------------------------------------------------------------------------------------------------------------------|-----------------------------------------------------------------------------------------------------------------------------------------------------------------------------------------------------------------------------------------------------------------------------------------------------------------------------------------------------------------------------------------------------------------------------------------------------------------------------------------------------------------------------------------------------------------------------------------------------------------------------------------------------------------------------------------------------------------------------------------------------------------------------------------------------------------------------------------------------------------------------------------------------------------------------------------------------------------------------------------------------------------------------------------------------------------------------------------------------------------------------------------------------------------------------------------|

## Questionnaire Danish:

| #  | Question:                                                                                                                                                                                            | Response:                                                                                                                                                                                                                                                                                                                                      |
|----|------------------------------------------------------------------------------------------------------------------------------------------------------------------------------------------------------|------------------------------------------------------------------------------------------------------------------------------------------------------------------------------------------------------------------------------------------------------------------------------------------------------------------------------------------------|
| 1  | Indtast din alder i fulde år.                                                                                                                                                                        | Individuelt respons I hele tal                                                                                                                                                                                                                                                                                                                 |
| 2  | Hvilket køn kan du bedst identificere dig med?                                                                                                                                                       | <ol style="list-style-type: none"> <li>1. Mand.</li> <li>2. Kvinde.</li> <li>3. Andet.</li> </ol>                                                                                                                                                                                                                                              |
| 3  | Hvor mange fulde semestre har du gennemført (dvs. både bachelor- og kandidatsemestre)?                                                                                                               | <ol style="list-style-type: none"> <li>1. 1 semestre.</li> <li>2. 2 semestre.</li> <li>3. 3 semestre.</li> <li>4. 4 semestre.</li> <li>5. 5 semestre.</li> <li>6. 6 semestre.</li> <li>7. 7 semestre.</li> <li>8. 8 semestre.</li> <li>9. 9 semestre.</li> <li>10. 10 semestre.</li> <li>11. 11 semestre.</li> <li>12. 12 semestre.</li> </ol> |
| 4  | Hvor mange fulde måneders klinisk erfaring ved siden af medicinstudiet har du på nuværende tidspunkt? - Dette både som FADL-sygeplejevikar (SPV), FADL-ventilator, lægevikar, 'stikker' eller andet. | Individuel angivelse af antal måneder som tal i tekstboks                                                                                                                                                                                                                                                                                      |
| 5  | Hvad er din kliniske erfaring baseret på? (Vælg venligst en eller flere af nedenstående svarmuligheder)                                                                                              | <ol style="list-style-type: none"> <li>1. FADL sygeplejevikar (SPV)</li> <li>2. FADL ventilator</li> <li>3. Lægevikar</li> <li>4. 'Stikker'</li> <li>5. Andet</li> <li>6. Ikke relevant</li> </ol>                                                                                                                                             |
| 5a | Hvis du valgte andet i spørgsmål 5: Hvad er din kliniske erfaring ellers baseret på?                                                                                                                 | Individuelt respons I tekstboks                                                                                                                                                                                                                                                                                                                |
| 6  | I hvilken grad er følgende udsagn vigtige for, at du melder dig til at indgå i et nationalt pandemiberedskab?                                                                                        |                                                                                                                                                                                                                                                                                                                                                |
| 6a | - Jeg vil gerne hjælpe mine medmennesker.                                                                                                                                                            | Visuel analog skala: 0 = I meget lav grad, 100 = I meget høj grad                                                                                                                                                                                                                                                                              |
| 6b | - Det forventes af mig                                                                                                                                                                               | Visuel analog skala: 0 = I meget lav grad, 100 = I meget høj grad                                                                                                                                                                                                                                                                              |

|                                                                                                                                                                                                                                                                                                                                                             |                                                                                                                                                                                                                                                                                                                                                                                                                                                                                                                                                                                                                                                                                                                                                                                                                                                                                    |                                                                                                                                                                                                                                                                                                                                                                                                                                                                                                                                                                                                                                                                                                                                                                                                                                                                                                           |
|-------------------------------------------------------------------------------------------------------------------------------------------------------------------------------------------------------------------------------------------------------------------------------------------------------------------------------------------------------------|------------------------------------------------------------------------------------------------------------------------------------------------------------------------------------------------------------------------------------------------------------------------------------------------------------------------------------------------------------------------------------------------------------------------------------------------------------------------------------------------------------------------------------------------------------------------------------------------------------------------------------------------------------------------------------------------------------------------------------------------------------------------------------------------------------------------------------------------------------------------------------|-----------------------------------------------------------------------------------------------------------------------------------------------------------------------------------------------------------------------------------------------------------------------------------------------------------------------------------------------------------------------------------------------------------------------------------------------------------------------------------------------------------------------------------------------------------------------------------------------------------------------------------------------------------------------------------------------------------------------------------------------------------------------------------------------------------------------------------------------------------------------------------------------------------|
| 1<br>2<br>3<br>4<br>5<br>6<br>7<br>8<br>9<br>10<br>11<br>12<br>13<br>14<br>15<br>16<br>17<br>18<br>19<br>20<br>21<br>22<br>23<br>24<br>25<br>26<br>27<br>28<br>29<br>30<br>31<br>32<br>33<br>34<br>35<br>36<br>37<br>38<br>39<br>40<br>41<br>42<br>43<br>44<br>45<br>46<br>47<br>48<br>49<br>50<br>51<br>52<br>53<br>54<br>55<br>56<br>57<br>58<br>59<br>60 | <p><b>6c</b> - Jeg bliver en del af det lægelige fællesskab.</p> <p><b>6d</b> - Jeg får udbygget min faglige jobprofil</p> <p><b>6e</b> - Der er taget forholdsregler, så jeg ikke bliver smittet under arbejdet.</p> <p><b>6f</b> - Jeg vil modtage supervision i mit arbejde</p> <p><b>6g</b> - Jeg får løn for arbejdet</p> <p><b>6h</b> - Jeg får mulighed for at lære noget</p> <p><b>6i</b> - Jeg bliver en del af en historisk begivenhed.</p> <p><b>6j</b> - Jeg får at vide, at der er brug for mig</p> <p><b>6k</b> - Jeg bliver stolt over at bidrage</p> <p><b>7</b> Har du yderligere årsager, der motiverer dig, som ikke er spurgt ind til?</p> <p><b>8</b> Hvordan ville du vægte lyst og pligt ift. at indgå i et pandemiberedskab?</p> <p><b>9</b> Hvilke af nedenstående udsagn beskriver bedst din stillingtagen til evt. deltagelse i pandemiberedskabet?</p> | <p>Visuel analog skala: 0 = I meget lav grad, 100 = I meget høj grad</p> <p>Visuel analog skala: 0 = I meget lav grad, 100 = I meget høj grad</p> <p>Visuel analog skala: 0 = I meget lav grad, 100 = I meget høj grad</p> <p>Visuel analog skala: 0 = I meget lav grad, 100 = I meget høj grad</p> <p>Visuel analog skala: 0 = I meget lav grad, 100 = I meget høj grad</p> <p>Visuel analog skala: 0 = I meget lav grad, 100 = I meget høj grad</p> <p>Visuel analog skala: 0 = I meget lav grad, 100 = I meget høj grad</p> <p>Visuel analog skala: 0 = I meget lav grad, 100 = I meget høj grad</p> <p>Individuelt respons I tekstboks.</p> <p>Visuel analog skala: 0 = Lyst, 100 = pligt.</p> <ol style="list-style-type: none"> <li>1. Jeg har meldt mig</li> <li>2. Jeg ønsker at melde mig</li> <li>3. Jeg overvejer at melde mig</li> <li>4. Jeg melder mig ikke</li> <li>5. Ved ikke</li> </ol> |
|-------------------------------------------------------------------------------------------------------------------------------------------------------------------------------------------------------------------------------------------------------------------------------------------------------------------------------------------------------------|------------------------------------------------------------------------------------------------------------------------------------------------------------------------------------------------------------------------------------------------------------------------------------------------------------------------------------------------------------------------------------------------------------------------------------------------------------------------------------------------------------------------------------------------------------------------------------------------------------------------------------------------------------------------------------------------------------------------------------------------------------------------------------------------------------------------------------------------------------------------------------|-----------------------------------------------------------------------------------------------------------------------------------------------------------------------------------------------------------------------------------------------------------------------------------------------------------------------------------------------------------------------------------------------------------------------------------------------------------------------------------------------------------------------------------------------------------------------------------------------------------------------------------------------------------------------------------------------------------------------------------------------------------------------------------------------------------------------------------------------------------------------------------------------------------|

**STROBE statement for: “Support for mobilizing medical students to join the COVID-19 pandemic emergency healthcare workforce – a cross-sectional questionnaire survey” - by Mike A, et al.**

STROBE Statement—Checklist of items that should be included in reports of *cross-sectional studies*

|                              | <b>Item No</b> | <b>Recommendation</b>                                                                                                                                                                                                                                                                                                                                                                                                                                   |
|------------------------------|----------------|---------------------------------------------------------------------------------------------------------------------------------------------------------------------------------------------------------------------------------------------------------------------------------------------------------------------------------------------------------------------------------------------------------------------------------------------------------|
| <b>Title and abstract</b>    | 1              | (a) Indicate the study’s design with a commonly used term in the title or the abstract<br><b>-page 1 line 2</b><br>(b) Provide in the abstract an informative and balanced summary of what was done and what was found <b>-Page 2</b>                                                                                                                                                                                                                   |
| <b>Introduction</b>          |                |                                                                                                                                                                                                                                                                                                                                                                                                                                                         |
| Background/rationale         | 2              | Explain the scientific background and rationale for the investigation being reported-<br><b>page 4</b>                                                                                                                                                                                                                                                                                                                                                  |
| Objectives                   | 3              | State specific objectives, including any prespecified hypotheses – <b>page 2, line 2, page 4, line 21</b>                                                                                                                                                                                                                                                                                                                                               |
| <b>Methods</b>               |                |                                                                                                                                                                                                                                                                                                                                                                                                                                                         |
| Study design                 | 4              | Present key elements of study design early in the paper <b>page 5, line 5-7</b>                                                                                                                                                                                                                                                                                                                                                                         |
| Setting                      | 5              | Describe the setting, locations, and relevant dates, including periods of recruitment, exposure, follow-up, and data collection – <b>page 5, lines: 6-7</b>                                                                                                                                                                                                                                                                                             |
| Participants                 | 6              | (a) Give the eligibility criteria, and the sources and methods of selection of participants – <b>Page 5, line 9-10</b>                                                                                                                                                                                                                                                                                                                                  |
| Variables                    | 7              | Clearly define all outcomes, exposures, predictors, potential confounders, and effect modifiers. Give diagnostic criteria, if applicable – <b>Page 6</b>                                                                                                                                                                                                                                                                                                |
| Data sources/<br>measurement | 8*             | For each variable of interest, give sources of data and details of methods of assessment (measurement). Describe comparability of assessment methods if there is more than one group – <b>Page 7, line 2-6</b>                                                                                                                                                                                                                                          |
| Bias                         | 9              | Describe any efforts to address potential sources of bias – <b>Page 7 Line 9-10</b>                                                                                                                                                                                                                                                                                                                                                                     |
| Study size                   | 10             | Explain how the study size was arrived at – <b>Page 5, line 9</b>                                                                                                                                                                                                                                                                                                                                                                                       |
| Quantitative variables       | 11             | Explain how quantitative variables were handled in the analyses. If applicable, describe which groupings were chosen and why- <b>page 7, line 17-22</b>                                                                                                                                                                                                                                                                                                 |
| Statistical methods          | 12             | (a) Describe all statistical methods, including those used to control for confounding -<br><b>page 7, line 17-22</b><br>(b) Describe any methods used to examine subgroups and interactions <b>page 7, line 17-22</b><br>(c) Explain how missing data were addressed <b>-page 8, line 1</b><br>(d) If applicable, describe analytical methods taking account of sampling strategy –<br><b>N/A</b><br>(e) Describe any sensitivity analyses – <b>N/A</b> |
| <b>Results</b>               |                |                                                                                                                                                                                                                                                                                                                                                                                                                                                         |
| Participants                 | 13*            | (a) Report numbers of individuals at each stage of study—eg numbers potentially eligible, examined for eligibility, confirmed eligible, included in the study, completing follow-up, and analysed – <b>page 9 line 3-4</b><br>(b) Give reasons for non-participation at each stage – <b>Strengths and limitations, page 11</b><br>(c) Consider use of a flow diagram – <b>N/A, Only one stage</b>                                                       |

|                          |     |                                                                                                                                                                                                                                                                                                                                                                                                                                                                   |
|--------------------------|-----|-------------------------------------------------------------------------------------------------------------------------------------------------------------------------------------------------------------------------------------------------------------------------------------------------------------------------------------------------------------------------------------------------------------------------------------------------------------------|
| Descriptive data         | 14* | (a) Give characteristics of study participants (eg demographic, clinical, social) and information on exposures and potential confounders – <b>page 9, line 5 - 10</b><br>(b) Indicate number of participants with missing data for each variable of interest – <b>page 8, line 1-3; table 1</b>                                                                                                                                                                   |
| Outcome data             | 15* | Report numbers of outcome events or summary measures – <b>page 18 + 19, table 1, table 2</b>                                                                                                                                                                                                                                                                                                                                                                      |
| Main results             | 16  | (a) Give unadjusted estimates and, if applicable, confounder-adjusted estimates and their precision (eg, 95% confidence interval). Make clear which confounders were adjusted for and why they were included – <b>page 19, table 2</b><br>(b) Report category boundaries when continuous variables were categorized – <b>N/A</b><br>(c) If relevant, consider translating estimates of relative risk into absolute risk for a meaningful time period – <b>N/A</b> |
| Other analyses           | 17  | Report other analyses done—eg analyses of subgroups and interactions, and sensitivity analyses – <b>No subgroup analysis, but categorization of clinical experience described on page 7, line 17-22</b>                                                                                                                                                                                                                                                           |
| <b>Discussion</b>        |     |                                                                                                                                                                                                                                                                                                                                                                                                                                                                   |
| Key results              | 18  | Summarise key results with reference to study objectives - <b>page 10, line 16-21</b>                                                                                                                                                                                                                                                                                                                                                                             |
| Limitations              | 19  | Discuss limitations of the study, taking into account sources of potential bias or imprecision. Discuss both direction and magnitude of any potential bias – <b>page 11, line 20</b>                                                                                                                                                                                                                                                                              |
| Interpretation           | 20  | Give a cautious overall interpretation of results considering objectives, limitations, multiplicity of analyses, results from similar studies, and other relevant evidence <b>page 12, line 4</b>                                                                                                                                                                                                                                                                 |
| Generalisability         | 21  | Discuss the generalisability (external validity) of the study results <b>page 12, line 12</b>                                                                                                                                                                                                                                                                                                                                                                     |
| <b>Other information</b> |     |                                                                                                                                                                                                                                                                                                                                                                                                                                                                   |
| Funding                  | 22  | Give the source of funding and the role of the funders for the present study and, if applicable, for the original study on which the present article is based – <b>page 14, line 14</b>                                                                                                                                                                                                                                                                           |

\*Give information separately for exposed and unexposed groups.

**Note:** An Explanation and Elaboration article discusses each checklist item and gives methodological background and published examples of transparent reporting. The STROBE checklist is best used in conjunction with this article (freely available on the Web sites of PLoS Medicine at <http://www.plosmedicine.org/>, Annals of Internal Medicine at <http://www.annals.org/>, and Epidemiology at <http://www.epidem.com/>). Information on the STROBE Initiative is available at [www.strobe-statement.org](http://www.strobe-statement.org).



# BMJ Open

## Support for mobilizing medical students to join the COVID-19 pandemic emergency healthcare workforce – a cross-sectional questionnaire survey

|                                 |                                                                                                                                                                                                                                                                                                                                                                                                                                                                                                 |
|---------------------------------|-------------------------------------------------------------------------------------------------------------------------------------------------------------------------------------------------------------------------------------------------------------------------------------------------------------------------------------------------------------------------------------------------------------------------------------------------------------------------------------------------|
| Journal:                        | <i>BMJ Open</i>                                                                                                                                                                                                                                                                                                                                                                                                                                                                                 |
| Manuscript ID                   | bmjopen-2020-039082.R2                                                                                                                                                                                                                                                                                                                                                                                                                                                                          |
| Article Type:                   | Original research                                                                                                                                                                                                                                                                                                                                                                                                                                                                               |
| Date Submitted by the Author:   | 17-Aug-2020                                                                                                                                                                                                                                                                                                                                                                                                                                                                                     |
| Complete List of Authors:       | Astorp, Mike; Aalborg University Hospital, Department of Geriatric Medicine<br>Sørensen, Gustav; Aalborg University Hospital, Department of Geriatric Medicine<br>Rasmussen, Sten; Aalborg University Hospital, Orthopaedic Surgery Research Unit<br>Emmersen, Jeppe; Aalborg University Faculty of Medicine<br>Erbs, Alexander; Aalborg University Faculty of Medicine<br>Andersen, Stig; Aalborg Universitet, Clinical Medicine; Aalborg University Hospital, Geriatric and Internal Medicine |
| <b>Primary Subject Heading</b>: | Medical education and training                                                                                                                                                                                                                                                                                                                                                                                                                                                                  |
| Secondary Subject Heading:      | Global health, Health informatics, Health policy, Medical management                                                                                                                                                                                                                                                                                                                                                                                                                            |
| Keywords:                       | MEDICAL EDUCATION & TRAINING, Health policy < HEALTH SERVICES ADMINISTRATION & MANAGEMENT, HEALTH SERVICES ADMINISTRATION & MANAGEMENT                                                                                                                                                                                                                                                                                                                                                          |
|                                 |                                                                                                                                                                                                                                                                                                                                                                                                                                                                                                 |

SCHOLARONE™  
Manuscripts



I, the Submitting Author has the right to grant and does grant on behalf of all authors of the Work (as defined in the below author licence), an exclusive licence and/or a non-exclusive licence for contributions from authors who are: i) UK Crown employees; ii) where BMJ has agreed a CC-BY licence shall apply, and/or iii) in accordance with the terms applicable for US Federal Government officers or employees acting as part of their official duties; on a worldwide, perpetual, irrevocable, royalty-free basis to BMJ Publishing Group Ltd ("BMJ") its licensees and where the relevant Journal is co-owned by BMJ to the co-owners of the Journal, to publish the Work in this journal and any other BMJ products and to exploit all rights, as set out in our [licence](#).

The Submitting Author accepts and understands that any supply made under these terms is made by BMJ to the Submitting Author unless you are acting as an employee on behalf of your employer or a postgraduate student of an affiliated institution which is paying any applicable article publishing charge ("APC") for Open Access articles. Where the Submitting Author wishes to make the Work available on an Open Access basis (and intends to pay the relevant APC), the terms of reuse of such Open Access shall be governed by a Creative Commons licence – details of these licences and which [Creative Commons](#) licence will apply to this Work are set out in our licence referred to above.

Other than as permitted in any relevant BMJ Author's Self Archiving Policies, I confirm this Work has not been accepted for publication elsewhere, is not being considered for publication elsewhere and does not duplicate material already published. I confirm all authors consent to publication of this Work and authorise the granting of this licence.

1  
2  
3  
4  
5  
6 Support for mobilizing medical students to join the COVID-19  
7  
8 pandemic emergency healthcare workforce – a cross-sectional  
9  
10 questionnaire survey  
11  
12  
13  
14  
15

16 **Mike S Astorp<sup>1,2</sup> (0000-0003-4062-6027), Gustav V B Sørensen<sup>1,2</sup> (0000-0002-7944-9913), Sten**  
17 **Rasmussen<sup>2,3</sup> (0000-0002-8664-352X), Jeppe Emmersen<sup>4</sup> (0000-0001-6244-1280), Alexander W**  
18 **Erbs<sup>4</sup> (0000-0003-3651-1112), Stig Andersen<sup>1,2</sup> (0000-0003-3632-5213).**  
19  
20  
21  
22

23  
24  
25 1 - Department of Geriatric Medicine, Aalborg University Hospital, 9000 Aalborg, Denmark  
26

27 2 - Department of Clinical Medicine, Aalborg University, 9000 Aalborg, Denmark  
28

29 3 - Department of Orthopaedic Surgery, Aalborg University Hospital, 9000 Aalborg, Denmark  
30

31 4 - Faculty of Medicine, Aalborg University, Niels Jernes Vej 10, 9000 Aalborg, Denmark  
32  
33  
34  
35  
36

37 **Correspondence to:**

38  
39 Mike S Astorp

40  
41 e-mail: [m.astorp@rn.dk](mailto:m.astorp@rn.dk)  
42

43 Department of Clinical Medicine

44 Faculty of Health, Aalborg University

45  
46 Sonder Skovvej 15

47  
48 9000 Aalborg

49  
50 Denmark  
51  
52  
53  
54  
55  
56  
57  
58  
59  
60

## Abstract:

**Objective:** To identify what motivates medical students to join a pandemic emergency healthcare workforce

**Design:** Cross-sectional.

**Setting:** Aalborg University, Denmark.

**Participants:** All medical students.

**Main outcome measures:** Motivational points as perceived by the students to be important. Demographic characteristics and 11 motivational domains scored on a Visual Analog Scale from 0 (low) to 100 (high) responding to the question: *“to what degree are the following statements important for you to join a national emergency preparedness workforce?”*. The questionnaire was developed by an expert panel in a process of 4 iterations.

### Results:

A total of 486 students of 688 (70.6%) completed the survey within seven days in March 2020. 80% had decided to join the pandemic emergency healthcare workforce. Ranked median scores for motivational statements in each domain were: care, 100; learn, 90; pride, 83; team, 77; needed, 75; safety, 75; supervision, 75; job, 73; duty, 66; salary, 62; historic, 50. Supervision ( $p<0.001$ ), salary ( $p<0.001$ ), and duty ( $p=0.001$ ) were given increasing priority with advancing study years. Interestingly, students added that support by the university and clarification study plans were priorities.

**Conclusions:** Results guide decision-makers and colleagues on how to motivate or reinforce medical students in joining the pandemic emergency healthcare workforce. Importantly, students emphasised protection for themselves.

## Article summary:

### Strengths and limitations of this study:

- A limitation was the focus on positive motivational points while omitting negative aspects.
- Student involvement in the construction of the questionnaire was hampered by complying to restrictions on gatherings and events
- Results may not be applicable to medical students in different contexts
- A strength of the study was the conduction of the survey while the COVID-19 pandemic was evolving
- Inviting all medical students at the university supported identifying changes in motivation with advancing study year

## Introduction

In December 2019, a new virus emerged in Wuhan city, the capital of Hubei province in China: the severe acute respiratory syndrome coronavirus 2 (SARS-CoV-2), previously known as 2019-nCoV.<sup>1</sup> The virus spreads rapidly, and mortality is a concern as death counts are climbing world-wide.<sup>2</sup> On the 11<sup>th</sup> of March 2020, the Director-General of the World Health Organization declared the outbreak of SARS-CoV-2 a pandemic.<sup>2</sup>

Turning to Europe, the impact of SARS-CoV-2 is currently seen in Italy with an immediate increase in intensive care unit admissions and fatalities have stunned the country.<sup>3</sup> Mid-February 2020, the alarm for an unknown presence of SARS-COV-2 in the Italian population was set-off. Here, a patient tested positive for SARS-COV-2 and admitted to intensive care in Lodi, Lombardy, Italy. During the following 24 hours, an additional 35 cases were admitted without transmission from the first case. Thus, Italy sets the scene through a case-scenario for what is to come for healthcare systems across the world, with a high risk of these being pushed beyond capacities. Thus, promptly preparing health services to deal with such a scenario is crucial.

It is critical to be aware that healthcare staff is a finite resource that is likely to become depleted during a pandemic as a result of illness.<sup>4</sup> Further, one in four doctors and final-year medical students may abandon work during a pandemic to protect their families and themselves.<sup>5</sup> The lack of healthcare workers has earlier been described during both the influenza pandemic of 1918 and the polio epidemic in 1952.<sup>6,7</sup> Here, medical students were key contributors to the pandemic emergency healthcare workforce and ensured vital care for patients. A Belgian study conducted in 2009 suggested that more than 80% of medical students would contribute to caring for pandemic patients.<sup>8</sup>

A recruitment strategy focusing on medical students as contributors could offer a solution to a healthcare workforce depletion during the current COVID-19 pandemic. Hence, it is essential to identify what motivates medical students to join a pandemic emergency healthcare workforce. This led us to conduct a survey among all medical students at Aalborg University, Aalborg, Denmark, on what motivates them to join the pandemic emergency healthcare workforce, as the pandemic was in its early phase.

## Methods

This paper is reported according to the Strengthening the Reporting of Observational Studies in Epidemiology (STROBE) guideline.<sup>9</sup>

### Study design and setting

We conducted a cross-sectional study using a survey questionnaire distributed at one point in time. The questionnaire was distributed on the 16<sup>th</sup> of March 2020 to all medical students at Aalborg University through individual, institutional e-mail addresses. Data collection closed on the 23<sup>rd</sup> of March 2020.

### Participants

We invited all medical students enrolled at Aalborg University, Aalborg, Denmark, at the time the questionnaire was distributed (n = 688). No exclusion criteria were applied. Admission to medical schools in Denmark rely on grades, medical education is free of charge, and it takes six years to become a medical doctor. At the medical school of Aalborg University, the guiding teaching principle is problem-based learning, and years four to six comprise learning in a clinical environment qualifying students to work as locum physicians when having completed the fourth year. Thus, a 4<sup>th</sup>-year medical student locum physician does supervised admissions and ward rounds with the attention of qualified doctors reviewing patients and notes.

The total number of medical students at Aalborg University increases by year groups as the medical education at Aalborg University expanded from an initial 35 graduating students in 2016 to an annual admission of 179 students from 2018 onwards.

The study did not involve patients.

### Variables

#### *Development of the research questionnaire*

1  
2  
3  
4 The questionnaire was constructed in a four-phase process. First, an expert panel was established comprising  
5 a medical student (AE) to ensure medical students' priorities, experience and preferences, a junior doctor  
6 (MSA), and a senior consultant with a focus on education (SA). This group performed a brainstorm on all likely  
7 relevant motivational domains that could motivate medical students to join the pandemic emergency  
8 healthcare workforce. Second, a selection of key domains that were considered to influence medical  
9 students' motivation on volunteering for the pandemic emergency healthcare workforce during the COVID-  
10 19 crisis was performed. Third, the questionnaire was constructed, and a final iteration focused on adding  
11 missed domains by two experts on education (JE, SR). Fourth, a process of method optimisation was  
12 conducted to enhance the quality of the final questionnaire (GVBS, SA).  
13  
14  
15  
16  
17  
18  
19  
20  
21  
22  
23  
24

#### 25 *Content of the questionnaire*

26  
27  
28 The questionnaire is available in the appendix in an English translation as well as the original version in  
29 Danish. It includes questions on both demographics and motivational factors. For demographics, we recorded  
30 gender, age, number of semesters completed, and clinical experience obtained aside from clinical  
31 placements planned in the curriculum. For questions on motivational factors, we presented 11 motivational  
32 statements following an overarching question: "To what degree are the following statements important for  
33 you to join a national emergency preparedness workforce?" (translation from Danish: "I hvilken grad er  
34 følgende udsagn vigtige for, at du melder dig til at indgå i et nationalt pandemiberedskab?"). The motivational  
35 statements included revolved around the care for fellow human beings, learning opportunities, pride in  
36 contributing, being part of the doctoral fellowship, being needed, own safety, supervision, job opportunities,  
37 duty, salary, and participation in a historical event. Students were asked to score each statement on a Visual  
38 Analog Scale from 0 to 100 with 0 being to a very low extent and 100 being to a very great extent. The  
39 questionnaire concluded by asking their status regarding joining the pandemic emergency healthcare  
40 workforce with reply options being: "Have joined", "Want to join", "Consider joining", "Have decided not to  
41 join", or "Undecided as to whether to join or not".  
42  
43  
44  
45  
46  
47  
48  
49  
50  
51  
52  
53  
54  
55  
56  
57  
58  
59  
60



## Data management

Data were collected and managed using Research Electronic Data Capture (REDCap) electronic data capture tools hosted at Region Nordjylland.<sup>10,11</sup> REDCap is a secure, web-based software platform designed to support data capture for research studies, providing 1) an intuitive interface for validated data capture; 2) audit trails for tracking data manipulation and export procedures; 3) automated export procedures for seamless data downloads to common statistical packages, and 4) procedures for data integration and interoperability with external sources.

## Bias

Selection bias in our available population was avoided by distributing the questionnaire to all medical students. We strived to avoid non-response bias by using neutral wording and formulations.

## Statistical analysis

In Denmark, one semester is equal to a half year of education, and we merged semesters to report advancement in full study years completed. Age groups were constructed by 20 years and below, 21-25 years, 26-30 years, and 31 years or older. Years of clinical experience were calculated, and students were grouped by below 1 year, 1-2 years, 2-3 years, and more than 3 years. For the question on motivational factors, we considered a score above 60 as high and above 80 as very high.

Variables were summarised using standard descriptive statistics. If normally distributed, continuous, and discrete, variables were summarised using means with standard deviations. If non-normally distributed medians with interquartile range were used. Normality of distributions was checked using QQ-plots and histograms. Categorical data were displayed using proportions. Comparisons were performed using Mann-Whitney for comparison of two groups, Kruskal-Wallis test for comparison of several groups, and the chi-squared test for comparing proportions. A p-value of less than 0.05 was considered statistically significant.

1  
2  
3  
4 Missing data accounted for 0.10% of demographic data and 0.36% of motivational statements. Therefore,  
5  
6 imputations were not performed, and observations with missing data were otherwise included in the  
7  
8 analyses.  
9

10  
11 The sample size was determined by the number of medical students enrolled at the bachelor and master  
12  
13 programs in medicine at Aalborg University, Aalborg, Denmark, during the study period. The statistical  
14  
15 software for the Social Sciences was used (IBM Corp. IBM SPSS Statistics for Windows, Version 13.0. NY: IBM  
16  
17 Corp.)  
18  
19

#### 20 21 **Patient and public involvement:** 22

23  
24 Patient and public involvement were hampered by restrictions on unnecessary assemblies. Combined with  
25  
26 the urgency of this study, the public and patient involvement were limited to the inclusion of a representative  
27  
28 medical student.  
29

30  
31 Patient and public involvement were incorporated by giving AE a distinct role during the problem-based  
32  
33 learning process.<sup>12</sup> AE contributed to the clarification of terms, had a separate time slot during brainstorming,  
34  
35 and making the scribe list. All views by AE on each issue were recorded and considered. A similar emphasis  
36  
37 was put on the student contribution put forward by AE during the discussion of problems and possible  
38  
39 explanations drawn on the student's knowledge and identification of areas of incomplete knowledge during  
40  
41 the review step.<sup>12</sup> This contributed to the selection of domains, and the construction of the questionnaire.  
42  
43 AE added to the consideration of the burden and time required to participate in the survey. AE is a 5<sup>th</sup>-year  
44  
45 medical student representing medical students by being the head of the Danish Medical Students  
46  
47 organization for Anesthesiology and Traumatology, a member of Medical Students Council, a member of  
48  
49 Aalborg University Hospital's steering committee on education of medical students to participate in the  
50  
51 pandemic as well as a locum physician at the Department of Orthopaedic Surgery at Aalborg University  
52  
53 Hospital. The experience along with contacts among fellow students and organisations will contribute to the  
54  
55 dissemination of the survey results among students regionally and nationally.  
56  
57  
58  
59  
60

## Results

### *Characteristics of participants*

The participation rate was 70.6% with 486 out of 688 medical students responding to the survey invitation, and with 415 (60.3%) responding within 48 hours. Table 1 lists the characteristics of the medical students participating. The sample did not differ from the available population of medical students at Aalborg University in terms of gender (male/female, 32.3/67.7%; chi-squared 0.16,  $p > 0.1$ ), and age (median (IQR): 23 (3) years in the sample,  $p > 0.1$ ). The median (IQR) of clinical experience was 3 (12) months. All but 35.2% had previous clinical experience. Being a substitute assistant nurse was the main non-curricular clinical occupation accounting for 35.8% of all medical students. Secondly, being a locum physician was seen in 13.6% of all medical students and 27.5% of those in the final three clinical years.

### *Motivation scores*

Four out of five stated that they had joined or wanted to join the pandemic emergency healthcare workforce, while 18.4% (89) were undecided (Table 1).

Table 2 lists the scores for each statement ranked by score. In general, the scores were high or very high with "care for fellow human beings", "learning opportunities", and "Pride in contributing" receiving the highest scores. "being part of the doctoral fellowship" and "being needed" receive a high score along with "own safety" and "supervision". "Participation in a historic event" and "salary" did not receive high scores.

### *Worries added by students*

Additional motivational factors mentioned by responding students were primarily related to study activities. The competition for the time used for studying, uncertainty regarding the need for reading, changing of study plans, and the risk of being barred from exams due to absence from clinical placements were concerns raised. Encouragement from the university was essential to some. Also, the risk of being infected was listed as a priority. To the other end, helping future colleagues was emphasized along with the quality and kind of work

1  
2  
3  
4 they would participate in. Finally, it was stated that the questions should have been on what prevents medical  
5  
6 students from contributing rather than on what motives them to join.  
7

### 8 9 *Differences among students*

10  
11  
12 “supervision” was given increasing priority with advancing study years. Scores for “duty” rose after the early  
13  
14 study years. “salary” received low scores during the first three years, and was higher in medical students at  
15  
16 the three final clinical years. Scores for “care for fellow humans” were higher by female students, but scores  
17  
18 were high for students of all genders. “Salary” was given increasing priority with clinical experience ( $p<0.001$ ).

19  
20  
21  
22 The eight who had replied “decided not to participate” in the pandemic emergency healthcare workforce  
23  
24 had markedly lower scores for “care for fellow humans” compared to those who replied “aimed to joined”  
25  
26 or “had joined” (median 77/100/100,  $p<0.001$ ). The same accounted for “being part of the doctoral  
27  
28 fellowship” (65/75/80,  $p=0.005$ ) and for “pride in contributing” (60/86/90,  $p<0.001$ ). “safety” scored slightly  
29  
30 different (97/75/75,  $p=0.056$ ).  
31  
32  
33  
34

## 35 **Discussion**

### 36 **Key results**

37  
38  
39  
40 The motivation for joining a pandemic emergency healthcare workforce was reported by medical students  
41  
42 to be an urge to help fellow human beings, a learning opportunity and taking pride in contributing. In  
43  
44 addition, motivational factors given priority were joining the doctoral fellowship, their help being needed,  
45  
46 their safety and guidance at work. The majority of medical students were willing to participate in the  
47  
48 pandemic emergency healthcare workforce, but they had concerns that should be and can be addressed  
49  
50 when acknowledged. Hospitals and senior colleagues can accommodate the request for supervision in the  
51  
52 clinical work using available tools and thereby support unique learning opportunities for medical students.<sup>13</sup>  
53  
54  
55 Such collaborative efforts support medical students teaming up with the medical fellowship to strengthen  
56  
57  
58  
59  
60

1  
2  
3  
4 the push for participation and learning further.<sup>14</sup> Also, this can be a benefit to the students' self-satisfaction  
5  
6 and appreciation of their efforts.  
7

8  
9 Importantly, medical students responded that their safety while working was a priority. Hospitals should  
10  
11 address this concern during training sessions and theoretical prequalification before students start clinical  
12  
13 practice. Senior colleagues should further address and support safety during clinical work. The students'  
14  
15 response uncovered a limited emphasis on salary and academic resume. Still, these factors were of some  
16  
17 interest and may be discussed during recruitment.  
18  
19

20  
21 Factors linked to study activity should be addressed. The university should settle uncertainty concerning  
22  
23 study plans and exams to provide clear guidance for students. Finally, students listed that encouragement by  
24  
25 the university to participate in a pandemic emergency healthcare workforce could be an incentive.  
26  
27

### 28 **Strengths and Limitations**

29  
30  
31 A strength of this survey was the timing. The COVID-19 pandemic was announced at the time of sending out  
32  
33 survey invitation, and death rates were high in China and rapidly rising in Southern Europe while the link was  
34  
35 open. This emphasized the severity of the situation and may have encouraged medical students to consider  
36  
37 whether to participate in the pandemic emergency workforce. Also, this may have supported the high  
38  
39 response rate of 71%. Age, gender, and distribution between study years were comparable between  
40  
41 responders and non-responders. It may be speculated that non-responders were undecided students. The  
42  
43 scores of 18.4% of responders undecided on whether to join the pandemic emergency healthcare workforce,  
44  
45 were just under median scores. Adding such scores is unlikely to alter the conclusions.  
46  
47  
48

49  
50 A limitation of the study is that the constructed questionnaire primarily addresses positive motivational  
51  
52 points as to joining the pandemic healthcare workforce and not what is impeding to the students. This could  
53  
54 have further have helped to guide clinicians and administrators contributing to a further elaborate list of  
55  
56 items and priorities to take into account. A note must be taken that the survey was performed in Denmark,  
57  
58 which has tax-funded healthcare and free education. This could influence the motivation of the students. The  
59  
60

1  
2  
3  
4 limitations regarding the involvement of the patient and the public may have hindered uncovering further  
5 relevant aspects and resulted in a limited representation of relevant groups.  
6  
7

### 8 9 **Interpretation**

10 An earlier study reported that more than 80% of medical students in the US would volunteer to participate  
11 in the healthcare workforce during a pandemic.<sup>4</sup> Our numbers were similar for a tax-funded health care  
12 system in Europe, and they are in line with a Belgian study reporting that 80% of final year medical students  
13 would volunteer during a pandemic.<sup>8</sup> Also, a concern for educational interruptions with an ongoing pandemic  
14 crisis was similar between our medical students in Europe and a group in North America.<sup>15</sup> The motivation of  
15 healthcare workers in general during a pandemic parallel some of our findings among medical students,  
16 including safety, being part of a team, and feeling useful.<sup>16,17</sup>  
17  
18  
19  
20  
21  
22  
23  
24  
25  
26

### 27 **Generalisability**

28 The generalisability is affected in a few ways. First, the survey was conducted at a university using problem-  
29 based learning and a spiral curriculum with the students embedded in the clinical environment for the final  
30 three years.<sup>18</sup> Second, education being for free may also influence motivation. However, medical students  
31 responded similarly in two domains to those in North America, suggesting similar responses despite these  
32 differences.  
33  
34  
35  
36  
37  
38  
39

### 40 **Clinical implications**

41 The most obvious implication is that medical students provide a resource eager to contribute to patient  
42 treatment and care during a pandemic emergency if few essential needs are met as detailed in this report  
43 and that this can easily be accommodated. In the case of an evolving pandemic, occurrence of local outbreaks  
44 and secondary waves of infections, access to this resource will become essential for decision- and policy-  
45 makers, both for the sake of patients and healthcare personal.  
46  
47  
48  
49  
50  
51  
52  
53

### 54 **Future research**

55 Future studies could evaluate if priorities changed with the crises at a distance and if priorities vary between  
56 medical students at universities with different curricula and pedagogical approaches to learning. Also, they  
57  
58  
59  
60

1  
2  
3  
4 should explore factors impeding medical student response and their concern for protection. Medical  
5  
6 students may be motivated to contribute to the healthcare workforce if work during a pandemic is relevant  
7  
8 to learning objectives. Studies to explore such opportunities are warranted.  
9

## 10 **Conclusion**

11  
12  
13 The present study provides a list of items and priorities to inspire and guide clinicians and administrators at  
14  
15 both hospitals and universities to support recruiting medical students for a pandemic emergency healthcare  
16  
17 workforce. Importantly, students emphasised safety for themselves. Hands-on recommendations include  
18  
19 focussing on learning opportunity, supervision, acceptance of educational interruptions by, and support  
20  
21 from, university.  
22  
23  
24  
25  
26  
27  
28  
29  
30  
31  
32  
33  
34  
35  
36  
37  
38  
39  
40  
41  
42  
43  
44  
45  
46  
47  
48  
49  
50  
51  
52  
53  
54  
55  
56  
57  
58  
59  
60

**Transparency statement:**

The lead author (the manuscript's guarantor) affirms that the manuscript is an honest, accurate, and transparent account of the study being reported; that no important aspects of the study have been omitted; and that any discrepancies from the study as originally planned (and, if relevant, registered) have been explained.

**Contributors:**

Conceptualisation: MSA, SR, JE, AE and SA. Formal analysis: MSA and SA. Methodology: MSA, AE, SA, SR, JE and GVBS. Project administration: MSA and SA. Resources: SA, GVBS and JE. Software: GVBS. Supervision: SA and GVBS. Validation: JE. Visualisation: MSA. Writing – Original Draft Preparation: MSA. Writing – Review and editing: MSA, SA, GVBS, AE, SR, JE. The corresponding author attests that all listed authors meet authorship criteria and that no others meeting the criteria have been omitted. Mike S Astorp is the guarantor of the study.

**Funding:**

This research received no funding support.

**Competing interests:**

All authors have completed the ICMJE uniform disclosure form at [www.icmje.org/coi\\_disclosure.pdf](http://www.icmje.org/coi_disclosure.pdf) and declare: no support from any organisation for the submitted work; no financial relationships with any organisations that might have an interest in the submitted work in the previous three years; no other relationships or activities that could appear to have influenced the submitted work.

**Ethics:**

Written informed consent was obtained from all students by agreeing to answer the questionnaire. Due to the study being a survey, ethical approval was not required according to the Danish Act on the Scientific



1  
2  
3  
4 Ethical Committee System (Act no. 593, section 14, subsection 2). Approval was obtained from the Danish  
5  
6 Data Protection Agency (record number 2020-030).  
7  
8

9  
10 **Data sharing statement:**

11  
12 The questionnaire will be shared in the appendix both in the original (Danish) and in a translation to English.  
13  
14 Extra data is available by emailing the corresponding author while individual participant data cannot be  
15  
16 shared for the reason of confidentiality.  
17  
18

19  
20 **Copyright and license for publication:**

21  
22 The Corresponding Author has the right to grant on behalf of all authors and does grant on behalf of all  
23  
24 authors, a world-wide licence to the Publishers and its licensees in perpetuity, in all forms, formats, and  
25  
26 media (whether known now or created in the future), to i) publish, reproduce, distribute, display and store  
27  
28 the Contribution, ii) translate the Contribution into other languages, create adaptations, reprints, include  
29  
30 within collections and create summaries, extracts and/or, abstracts of the Contribution, iii) create any other  
31  
32 derivative work(s) based on the Contribution, iv) to exploit all subsidiary rights in the Contribution, v) the  
33  
34 inclusion of electronic links from the Contribution to third party material where-ever it may be located; and,  
35  
36 vi) licence any third party to do any or all of the above.  
37  
38  
39  
40

41 **Dissemination to participants and related patient and public communities:**

42  
43 Results will be distributed to Danish government officials with responsibility for providing national  
44  
45 healthcare, Aalborg University, The North Denmark Region, all medical students at Aalborg University, the  
46  
47 Organization for Danish medical students (FADL), the organization for medical students at Aalborg University.  
48  
49  
50  
51  
52  
53  
54  
55  
56  
57  
58  
59  
60

## References

1. Zhou F, Yu T, Du R, et al. Clinical course and risk factors for mortality of adult inpatients with COVID-19 in Wuhan, China: a retrospective cohort study. *Lancet*. 2020;6736(20):1-9. doi:10.1016/S0140-6736(20)30566-3
2. Kinross P, Suetens C, Gomes Dias J, et al. Rapidly increasing cumulative incidence of coronavirus disease (COVID-19) in the European Union/European Economic Area and the United Kingdom, 1 January to 15 March 2020. *Eurosurveillance*. March 2020. doi:10.2807/1560-7917.ES.2020.25.11.2000285
3. Grasselli G, Pesenti A, Cecconi M. Critical Care Utilization for the COVID-19 Outbreak in Lombardy, Italy. *JAMA*. March 2020. doi:10.1001/jama.2020.4031
4. Herman B, Rosychuk RJ, Bailey T, Lake R, Yonge O, Marrie TJ. Medical students and pandemic influenza. *Emerg Infect Dis*. 2007;13(11):1781-1783. doi:10.3201/eid1311.070279
5. Ehrenstein BP, Hanses F, Salzberger B. Influenza pandemic and professional duty: family or patients first? A survey of hospital employees. *BMC Public Health*. 2006;6(1):311. doi:10.1186/1471-2458-6-311
6. Starr I. Influenza in 1918: Recollections of the Epidemic in Philadelphia. *Ann Intern Med*. 2006;145(2):138. doi:10.7326/0003-4819-145-2-200607180-00132
7. Astrup P, Gotzche H, Neukirch F. Laboratory Investigations during Treatment of Patients with Poliomyelitis and Respiratory Paralysis. *BMJ*. 1954;1(4865):780-786. doi:10.1136/bmj.1.4865.780
8. Mortelmans LJM, Cauwer HG De, Dyck E Van, Monballyu P, Giel R Van, Turnhout E Van. Are Belgian Senior Medical Students Ready to Deliver Basic Medical Care in Case of a H5N1 Pandemic? *Prehosp Disaster Med*. 2009;24(5):438-442. doi:10.1017/S1049023X00007287
9. Vandembroucke JP, Von Elm E, Altman DG, et al. Strengthening the Reporting of Observational Studies in Epidemiology (STROBE): Explanation and elaboration. *PLoS Med*. 2007;4(10):1628-1654. doi:10.1371/journal.pmed.0040297
10. Harris PA, Taylor R, Minor BL, et al. The REDCap consortium: Building an international community of software platform partners. *J Biomed Inform*. 2019;95:103208. doi:10.1016/j.jbi.2019.103208
11. Harris PA, Taylor R, Thielke R, Payne J, Gonzalez N, Conde JG. Research electronic data capture (REDCap)—A metadata-driven methodology and workflow process for providing translational research informatics support. *J Biomed Inform*. 2009;42(2):377-381. doi:10.1016/j.jbi.2008.08.010
12. Wood DF. Problem based learning What is problem based learning ? *Bmj*. 2003;326(February):328-330. doi:10.1136/bmj.326.7384.328
13. Spencer J. ABC of learning and teaching in medicine: Learning and teaching in the clinical environment. *Br Med J*. 2003;326(7389):591-594. doi:10.1136/bmj.326.7389.591
14. Dornan T, Medical M. Supporting medical students' workplace learning : *Clin Teach*. 2009;6:167-171.
15. Clark J. Fear of SARS thwarts medical education in Toronto. *BMJ*. 2003;326(7393):784c - 784. doi:10.1136/bmj.326.7393.784/c
16. Anantham D, McHugh W, O'Neill S, Forrow L. Clinical review: Influenza pandemic - Physicians and their obligations. *Crit Care*. 2008;12(3):2-6. doi:10.1186/cc6918

- 1  
2  
3  
4 17. Ives J, Greenfield S, Parry JM, et al. Healthcare workers' attitudes to working during pandemic  
5 influenza: a qualitative study. *BMC Public Health*. 2009;9(1):56. doi:10.1186/1471-2458-9-56  
6  
7 18. Andersen S, Stentoft D, Emmersen J, Rasmussen S, Birkelund S, Nøhr S. Contention over  
8 undergraduate medical curriculum content. *Int J Med Educ*. 2019;10:230-231.  
9 doi:10.5116/ijme.5de7.7516  
10  
11  
12  
13  
14  
15  
16  
17  
18  
19  
20  
21  
22  
23  
24  
25  
26  
27  
28  
29  
30  
31  
32  
33  
34  
35  
36  
37  
38  
39  
40  
41  
42  
43  
44  
45  
46  
47  
48  
49  
50  
51  
52  
53  
54  
55  
56  
57  
58  
59  
60

For peer review only

Table 1  
 Characteristics of medical students participating in the survey

|                                           |                   | %    | N   |                |
|-------------------------------------------|-------------------|------|-----|----------------|
| <b>Age groups</b>                         |                   |      |     |                |
|                                           | up to 20 y        | 9.1  | 44  |                |
|                                           | 21-25 y           | 71,6 | 348 |                |
|                                           | 26-30 y           | 15,2 | 74  |                |
|                                           | 31+ y             | 4.1  | 20  |                |
|                                           | total             | 100  | 486 |                |
| <b>Gender*</b>                            |                   |      |     |                |
|                                           | Male              | 31.1 | 151 |                |
|                                           | Female            | 68.5 | 332 |                |
|                                           | Other             | 0.4  | 2   |                |
|                                           | total             | 100  | 485 |                |
| <b>Study year</b>                         |                   |      |     |                |
|                                           | 1.                | 23.7 | 115 | total**<br>173 |
|                                           | 2.                | 17.7 | 86  | 149            |
|                                           | 3.                | 21.4 | 104 | 126            |
|                                           | 4.                | 16.5 | 80  | 108            |
|                                           | 5.                | 15.0 | 73  | 83             |
|                                           | 6.                | 5.8  | 28  | 49             |
|                                           | total             | 100  | 486 | 688            |
| <b>Clinical experience (years)*</b>       |                   |      |     |                |
|                                           | < 1 y             | 76.0 | 369 |                |
|                                           | 1-2 y             | 12.2 | 59  |                |
|                                           | 2-3 y             | 6.0  | 29  |                |
|                                           | 3+ y              | 5.8  | 28  |                |
|                                           | total             | 100  | 485 |                |
| <b>Joins pandemic emergency workforce</b> |                   |      |     |                |
|                                           | Has joined        | 63.4 | 308 |                |
|                                           | Aims to join      | 16.7 | 81  |                |
|                                           | Considers to join | 16.5 | 80  |                |
|                                           | Don't know        | 1.9  | 9   |                |
|                                           | Won't join        | 1.6  | 8   |                |
|                                           | total             | 100  | 486 |                |
| <b>Among decided</b>                      |                   |      |     |                |
|                                           | yes               | 98.0 | 389 |                |
|                                           | no                | 2.0  | 8   |                |
|                                           | total             | 100  | 397 |                |

\* missing data: 1 gender; 1 clinical experience

\*\* the number of medical students enrolled by each study year

Table 2

Scores for joining the pandemic emergency healthcare force as stated by medical students in reply to the question (the students were not shown the domains presented in this table):

"To what degree are the following statements important for you to join a national emergency preparedness workforce for a pandemic?". Scores were on a scale from 0 to 100.

| Domain      | Question asked                                                              | Median | 25; 75 percentiles | Mean | P; gender / study year |
|-------------|-----------------------------------------------------------------------------|--------|--------------------|------|------------------------|
| Care        |                                                                             |        |                    | 92.8 |                        |
|             | I would like to help my fellow human beings                                 | 100    | 88; 100            |      | 0.001 / 0.068          |
| Learn       |                                                                             |        |                    | 84.7 |                        |
|             | I will be provided an opportunity to learn something                        | 90     | 75; 100            |      | ns / ns                |
| Pride       |                                                                             |        |                    | 79.0 |                        |
|             | I will take pride in contributing                                           | 83     | 66; 100            |      | ns / ns                |
| Team        |                                                                             |        |                    | 73.3 |                        |
|             | I become a part of the doctoral fellowship                                  | 77     | 60; 100            |      | ns / ns                |
| Needed      |                                                                             |        |                    | 73.4 |                        |
|             | I am informed that I am needed                                              | 75     | 60; 94             |      | ns / 0.053             |
| safety      |                                                                             |        |                    | 71.7 |                        |
|             | Precautions have been taken to prevent me from getting infected during work | 75     | 50;99              |      | 0.024 / 0.085          |
| supervision |                                                                             |        |                    | 72.5 |                        |
|             | I will receive supervision in my work                                       | 75     | 55;93              |      | 0.014 / <0.001         |
| Job         |                                                                             |        |                    | 69.4 |                        |
|             | I develop my professional job profile                                       | 73     | 51; 93             |      | 0.030 / 0.003          |
| Duty        |                                                                             |        |                    | 60.1 |                        |
|             | It is expected from me                                                      | 66     | 47; 80             |      | ns / 0.001             |
| Salary      |                                                                             |        |                    | 60.9 |                        |
|             | I get paid for my work                                                      | 62     | 50; 84             |      | ns / <0.001            |
| History     |                                                                             |        |                    | 50.9 |                        |
|             | I become part of a historic event                                           | 50     | 21; 76             |      | 0.060 / ns             |

ns: p >0.1 in Mann-Whitney and Kruskal-Wallis test for gender and study year respectively  
15 responders had missing data comprising 0.3% of all data. Imputations were omitted.

## Questionnaire English:

| #  | Question:                                                                                                                                                                                                                                                       | Response:                                                                                                                                                                                                                                                                                                                                                 |
|----|-----------------------------------------------------------------------------------------------------------------------------------------------------------------------------------------------------------------------------------------------------------------|-----------------------------------------------------------------------------------------------------------------------------------------------------------------------------------------------------------------------------------------------------------------------------------------------------------------------------------------------------------|
| 1  | Please provide your age in whole years.                                                                                                                                                                                                                         | Individual response in whole numbers.                                                                                                                                                                                                                                                                                                                     |
| 2  | Which gender do you identify yourself with the most?                                                                                                                                                                                                            | <ol style="list-style-type: none"> <li>1. Male.</li> <li>2. Female.</li> <li>3. Others.</li> </ol>                                                                                                                                                                                                                                                        |
| 3  | <p>How many semesters have you completed?</p> <p>This includes both semesters completed in the Bachelor and Masters programme in medicine.</p>                                                                                                                  | <ol style="list-style-type: none"> <li>1. 1 semester.</li> <li>2. 2 semesters.</li> <li>3. 3 semesters.</li> <li>4. 4 semesters.</li> <li>5. 5 semesters.</li> <li>6. 6 semesters.</li> <li>7. 7 semesters.</li> <li>8. 8 semesters.</li> <li>9. 9 semesters.</li> <li>10. 10 semesters.</li> <li>11. 11 semesters.</li> <li>12. 12 semesters.</li> </ol> |
| 4  | <p>Aside from your university studies, how many full months of clinical experience have you gained currently?</p> <p>This includes both experiences gained as a substitute assistant nurse, ventilator assistant, locum physician, phlebotomist, or others.</p> | Individual response in full months provided as a whole number in a textbox.                                                                                                                                                                                                                                                                               |
| 5  | What is your clinical experience based upon? (please select one or more of the following answers)                                                                                                                                                               | <ol style="list-style-type: none"> <li>1. Substitute assistant nurse</li> <li>2. Ventilator assistant</li> <li>3. Locum physician</li> <li>4. Phlebotomist</li> <li>5. Others.</li> <li>6. Not relevant</li> </ol>                                                                                                                                        |
| 5a | If you selected "Others" in Question 5, what are your clinical experiences based on?                                                                                                                                                                            | Individual text response.                                                                                                                                                                                                                                                                                                                                 |
| 6  | to what degree are the following statements important for you to join a national emergency preparedness workforce?                                                                                                                                              |                                                                                                                                                                                                                                                                                                                                                           |

|    |           |                                                                                                                                                    |
|----|-----------|----------------------------------------------------------------------------------------------------------------------------------------------------|
| 1  |           |                                                                                                                                                    |
| 2  |           |                                                                                                                                                    |
| 3  |           |                                                                                                                                                    |
| 4  |           |                                                                                                                                                    |
| 5  | <b>6a</b> | - I would like to help my fellow human beings                                                                                                      |
| 6  |           | Visual Analog Scale: 0 = To a very low extent, 100 = To a very great extent                                                                        |
| 7  | <b>6b</b> | - It is expected from me                                                                                                                           |
| 8  |           | Visual Analog Scale: 0 = To a very low extent, 100 = To a very great extent                                                                        |
| 9  |           |                                                                                                                                                    |
| 10 | <b>6c</b> | - I become a part of the doctoral fellowship                                                                                                       |
| 11 |           | Visual Analog Scale: 0 = To a very low extent, 100 = To a very great extent                                                                        |
| 12 | <b>6d</b> | - I develop my professional job profile                                                                                                            |
| 13 |           | Visual Analog Scale: 0 = To a very low extent, 100 = To a very great extent                                                                        |
| 14 | <b>6e</b> | - Precautions have been taken to prevent me from getting infected during work                                                                      |
| 15 |           | Visual Analog Scale: 0 = To a very low extent, 100 = To a very great extent                                                                        |
| 16 |           |                                                                                                                                                    |
| 17 | <b>6f</b> | - I will receive supervision in my work                                                                                                            |
| 18 |           | Visual Analog Scale: 0 = To a very low extent, 100 = To a very great extent                                                                        |
| 19 |           |                                                                                                                                                    |
| 20 | <b>6g</b> | - I get paid for my work.                                                                                                                          |
| 21 |           | Visual Analog Scale: 0 = To a very low extent, 100 = To a very great extent                                                                        |
| 22 |           |                                                                                                                                                    |
| 23 | <b>6h</b> | - I will be provided an opportunity to learn something                                                                                             |
| 24 |           | Visual Analog Scale: 0 = To a very low extent, 100 = To a very great extent                                                                        |
| 25 | <b>6i</b> | - I become part of a historic event                                                                                                                |
| 26 |           | Visual Analog Scale: 0 = To a very low extent, 100 = To a very great extent                                                                        |
| 27 |           |                                                                                                                                                    |
| 28 | <b>6j</b> | - I am informed that I am needed                                                                                                                   |
| 29 |           | Visual Analog Scale: 0 = To a very low extent, 100 = To a very great extent                                                                        |
| 30 |           |                                                                                                                                                    |
| 31 | <b>6k</b> | - I will take pride in contributing                                                                                                                |
| 32 |           | Visual Analog Scale: 0 = To a very low extent, 100 = To a very great extent                                                                        |
| 33 |           |                                                                                                                                                    |
| 34 | <b>7</b>  | Do you have further causes for motivation that have not been addressed?                                                                            |
| 35 |           | Individual response.                                                                                                                               |
| 36 |           |                                                                                                                                                    |
| 37 | <b>8</b>  | In terms of joining a national emergency preparedness against a pandemic, how would you weigh inclination over obligation to join?                 |
| 38 |           | Visual Analog Scale: 0 = Inclination to join, 100 = Obligation to join.                                                                            |
| 39 |           |                                                                                                                                                    |
| 40 | <b>9</b>  | In terms of possibly joining a national emergency preparedness against a pandemic, which of the following statements best describes your decision? |
| 41 |           | 1. Have joined.                                                                                                                                    |
| 42 |           | 2. I want to join.                                                                                                                                 |
| 43 |           | 3. I am considering to join.                                                                                                                       |
| 44 |           | 4. I will not join.                                                                                                                                |
| 45 |           | 5. I do not know                                                                                                                                   |
| 46 |           |                                                                                                                                                    |
| 47 |           |                                                                                                                                                    |
| 48 |           |                                                                                                                                                    |
| 49 |           |                                                                                                                                                    |
| 50 |           |                                                                                                                                                    |
| 51 |           |                                                                                                                                                    |
| 52 |           |                                                                                                                                                    |
| 53 |           |                                                                                                                                                    |
| 54 |           |                                                                                                                                                    |
| 55 |           |                                                                                                                                                    |
| 56 |           |                                                                                                                                                    |
| 57 |           |                                                                                                                                                    |
| 58 |           |                                                                                                                                                    |
| 59 |           |                                                                                                                                                    |
| 60 |           |                                                                                                                                                    |

## Questionnaire Danish:

| #  | Question:                                                                                                                                                                                            | Response:                                                                                                                                                                                                                                                                                                                                      |
|----|------------------------------------------------------------------------------------------------------------------------------------------------------------------------------------------------------|------------------------------------------------------------------------------------------------------------------------------------------------------------------------------------------------------------------------------------------------------------------------------------------------------------------------------------------------|
| 1  | Indtast din alder i fulde år.                                                                                                                                                                        | Individuelt respons I hele tal                                                                                                                                                                                                                                                                                                                 |
| 2  | Hvilket køn kan du bedst identificere dig med?                                                                                                                                                       | <ol style="list-style-type: none"> <li>1. Mand.</li> <li>2. Kvinde.</li> <li>3. Andet.</li> </ol>                                                                                                                                                                                                                                              |
| 3  | Hvor mange fulde semestre har du gennemført (dvs. både bachelor- og kandidatsemestre)?                                                                                                               | <ol style="list-style-type: none"> <li>1. 1 semestre.</li> <li>2. 2 semestre.</li> <li>3. 3 semestre.</li> <li>4. 4 semestre.</li> <li>5. 5 semestre.</li> <li>6. 6 semestre.</li> <li>7. 7 semestre.</li> <li>8. 8 semestre.</li> <li>9. 9 semestre.</li> <li>10. 10 semestre.</li> <li>11. 11 semestre.</li> <li>12. 12 semestre.</li> </ol> |
| 4  | Hvor mange fulde måneders klinisk erfaring ved siden af medicinstudiet har du på nuværende tidspunkt? - Dette både som FADL-sygeplejeviker (SPV), FADL-ventilator, lægeviker, 'stikker' eller andet. | Individuel angivelse af antal måneder som tal i tekstboks                                                                                                                                                                                                                                                                                      |
| 5  | Hvad er din kliniske erfaring baseret på? (Vælg venligst en eller flere af nedenstående svarmuligheder)                                                                                              | <ol style="list-style-type: none"> <li>1. FADL sygeplejeviker (SPV)</li> <li>2. FADL ventilator</li> <li>3. Lægeviker</li> <li>4. 'Stikker'</li> <li>5. Andet</li> <li>6. Ikke relevant</li> </ol>                                                                                                                                             |
| 5a | Hvis du valgte andet i spørgsmål 5: Hvad er din kliniske erfaring ellers baseret på?                                                                                                                 | Individuelt respons I tekstboks                                                                                                                                                                                                                                                                                                                |
| 6  | I hvilken grad er følgende udsagn vigtige for, at du melder dig til at indgå i et nationalt pandemiberedskab?                                                                                        |                                                                                                                                                                                                                                                                                                                                                |
| 6a | - Jeg vil gerne hjælpe mine medmennesker.                                                                                                                                                            | Visuel analog skala: 0 = I meget lav grad, 100 = I meget høj grad                                                                                                                                                                                                                                                                              |
| 6b | - Det forventes af mig                                                                                                                                                                               | Visuel analog skala: 0 = I meget lav grad, 100 = I meget høj grad                                                                                                                                                                                                                                                                              |



|    |           |                                                                                                                              |
|----|-----------|------------------------------------------------------------------------------------------------------------------------------|
| 1  |           |                                                                                                                              |
| 2  |           |                                                                                                                              |
| 3  |           |                                                                                                                              |
| 4  | <b>6c</b> | - Jeg bliver en del af det lægelige fællesskab.                                                                              |
| 5  |           | Visuel analog skala: 0 = I meget lav grad, 100 = I meget høj grad                                                            |
| 6  | <b>6d</b> | - Jeg får udbygget min faglige jobprofil                                                                                     |
| 7  |           | Visuel analog skala: 0 = I meget lav grad, 100 = I meget høj grad                                                            |
| 8  | <b>6e</b> | - Der er taget forholdsregler, så jeg ikke bliver smittet under arbejdet.                                                    |
| 9  |           | Visuel analog skala: 0 = I meget lav grad, 100 = I meget høj grad                                                            |
| 10 | <b>6f</b> | - Jeg vil modtage supervision i mit arbejde                                                                                  |
| 11 |           | Visuel analog skala: 0 = I meget lav grad, 100 = I meget høj grad                                                            |
| 12 | <b>6g</b> | - Jeg får løn for arbejdet                                                                                                   |
| 13 |           | Visuel analog skala: 0 = I meget lav grad, 100 = I meget høj grad                                                            |
| 14 | <b>6h</b> | - Jeg får mulighed for at lære noget                                                                                         |
| 15 |           | Visuel analog skala: 0 = I meget lav grad, 100 = I meget høj grad                                                            |
| 16 | <b>6i</b> | - Jeg bliver en del af en historisk begivenhed.                                                                              |
| 17 |           | Visuel analog skala: 0 = I meget lav grad, 100 = I meget høj grad                                                            |
| 18 | <b>6j</b> | - Jeg får at vide, at der er brug for mig                                                                                    |
| 19 |           | Visuel analog skala: 0 = I meget lav grad, 100 = I meget høj grad                                                            |
| 20 | <b>6k</b> | - Jeg bliver stolt over at bidrage                                                                                           |
| 21 |           | Visuel analog skala: 0 = I meget lav grad, 100 = I meget høj grad                                                            |
| 22 | <b>7</b>  | Har du yderligere årsager, der motiverer dig, som ikke er spurgt ind til?                                                    |
| 23 |           | Individuelt respons I tekstboks.                                                                                             |
| 24 | <b>8</b>  | Hvordan ville du vægte lyst og pligt ift. at indgå i et pandemiberedskab?                                                    |
| 25 |           | Visuel analog skala: 0 = Lyst, 100 = pligt.                                                                                  |
| 26 | <b>9</b>  | Hvilke af nedenstående udsagn beskriver bedst din stillingtagen til evt. deltagelse i pandemiberedskabet?                    |
| 27 |           | 1. Jeg har meldt mig<br>2. Jeg ønsker at melde mig<br>3. Jeg overvejer at melde mig<br>4. Jeg melder mig ikke<br>5. Ved ikke |
| 28 |           |                                                                                                                              |
| 29 |           |                                                                                                                              |
| 30 |           |                                                                                                                              |
| 31 |           |                                                                                                                              |
| 32 |           |                                                                                                                              |
| 33 |           |                                                                                                                              |
| 34 |           |                                                                                                                              |
| 35 |           |                                                                                                                              |
| 36 |           |                                                                                                                              |
| 37 |           |                                                                                                                              |
| 38 |           |                                                                                                                              |
| 39 |           |                                                                                                                              |
| 40 |           |                                                                                                                              |
| 41 |           |                                                                                                                              |
| 42 |           |                                                                                                                              |
| 43 |           |                                                                                                                              |
| 44 |           |                                                                                                                              |
| 45 |           |                                                                                                                              |
| 46 |           |                                                                                                                              |
| 47 |           |                                                                                                                              |
| 48 |           |                                                                                                                              |
| 49 |           |                                                                                                                              |
| 50 |           |                                                                                                                              |
| 51 |           |                                                                                                                              |
| 52 |           |                                                                                                                              |
| 53 |           |                                                                                                                              |
| 54 |           |                                                                                                                              |
| 55 |           |                                                                                                                              |
| 56 |           |                                                                                                                              |
| 57 |           |                                                                                                                              |
| 58 |           |                                                                                                                              |
| 59 |           |                                                                                                                              |
| 60 |           |                                                                                                                              |

**STROBE statement for: “Support for mobilizing medical students to join the COVID-19 pandemic emergency healthcare workforce – a cross-sectional questionnaire survey” - by Mike A, et al.**

STROBE Statement—Checklist of items that should be included in reports of *cross-sectional studies*

|                              | <b>Item No</b> | <b>Recommendation</b>                                                                                                                                                                                                                                                                                                                                                                                                                                   |
|------------------------------|----------------|---------------------------------------------------------------------------------------------------------------------------------------------------------------------------------------------------------------------------------------------------------------------------------------------------------------------------------------------------------------------------------------------------------------------------------------------------------|
| <b>Title and abstract</b>    | 1              | (a) Indicate the study’s design with a commonly used term in the title or the abstract<br><b>-page 1 line 2</b><br>(b) Provide in the abstract an informative and balanced summary of what was done and what was found <b>-Page 2</b>                                                                                                                                                                                                                   |
| <b>Introduction</b>          |                |                                                                                                                                                                                                                                                                                                                                                                                                                                                         |
| Background/rationale         | 2              | Explain the scientific background and rationale for the investigation being reported-<br><b>page 4</b>                                                                                                                                                                                                                                                                                                                                                  |
| Objectives                   | 3              | State specific objectives, including any prespecified hypotheses – <b>page 2, line 2, page 4, line 21</b>                                                                                                                                                                                                                                                                                                                                               |
| <b>Methods</b>               |                |                                                                                                                                                                                                                                                                                                                                                                                                                                                         |
| Study design                 | 4              | Present key elements of study design early in the paper <b>page 5, line 5-7</b>                                                                                                                                                                                                                                                                                                                                                                         |
| Setting                      | 5              | Describe the setting, locations, and relevant dates, including periods of recruitment, exposure, follow-up, and data collection – <b>page 5, lines: 6-7</b>                                                                                                                                                                                                                                                                                             |
| Participants                 | 6              | (a) Give the eligibility criteria, and the sources and methods of selection of participants – <b>Page 5, line 9-10</b>                                                                                                                                                                                                                                                                                                                                  |
| Variables                    | 7              | Clearly define all outcomes, exposures, predictors, potential confounders, and effect modifiers. Give diagnostic criteria, if applicable – <b>Page 6</b>                                                                                                                                                                                                                                                                                                |
| Data sources/<br>measurement | 8*             | For each variable of interest, give sources of data and details of methods of assessment (measurement). Describe comparability of assessment methods if there is more than one group – <b>Page 7, line 2-6</b>                                                                                                                                                                                                                                          |
| Bias                         | 9              | Describe any efforts to address potential sources of bias – <b>Page 7 Line 9-10</b>                                                                                                                                                                                                                                                                                                                                                                     |
| Study size                   | 10             | Explain how the study size was arrived at – <b>Page 5, line 9</b>                                                                                                                                                                                                                                                                                                                                                                                       |
| Quantitative variables       | 11             | Explain how quantitative variables were handled in the analyses. If applicable, describe which groupings were chosen and why- <b>page 7, line 17-22</b>                                                                                                                                                                                                                                                                                                 |
| Statistical methods          | 12             | (a) Describe all statistical methods, including those used to control for confounding -<br><b>page 7, line 17-22</b><br>(b) Describe any methods used to examine subgroups and interactions <b>page 7, line 17-22</b><br>(c) Explain how missing data were addressed <b>-page 8, line 1</b><br>(d) If applicable, describe analytical methods taking account of sampling strategy –<br><b>N/A</b><br>(e) Describe any sensitivity analyses – <b>N/A</b> |
| <b>Results</b>               |                |                                                                                                                                                                                                                                                                                                                                                                                                                                                         |
| Participants                 | 13*            | (a) Report numbers of individuals at each stage of study—eg numbers potentially eligible, examined for eligibility, confirmed eligible, included in the study, completing follow-up, and analysed – <b>page 9 line 3-4</b><br>(b) Give reasons for non-participation at each stage – <b>Strengths and limitations, page 11</b><br>(c) Consider use of a flow diagram – <b>N/A, Only one stage</b>                                                       |

|                          |     |                                                                                                                                                                                                                                                                                                                                                                                                                                                                   |
|--------------------------|-----|-------------------------------------------------------------------------------------------------------------------------------------------------------------------------------------------------------------------------------------------------------------------------------------------------------------------------------------------------------------------------------------------------------------------------------------------------------------------|
| Descriptive data         | 14* | (a) Give characteristics of study participants (eg demographic, clinical, social) and information on exposures and potential confounders – <b>page 9, line 5 - 10</b><br>(b) Indicate number of participants with missing data for each variable of interest – <b>page 8, line 1-3; table 1</b>                                                                                                                                                                   |
| Outcome data             | 15* | Report numbers of outcome events or summary measures – <b>page 18 + 19, table 1, table 2</b>                                                                                                                                                                                                                                                                                                                                                                      |
| Main results             | 16  | (a) Give unadjusted estimates and, if applicable, confounder-adjusted estimates and their precision (eg, 95% confidence interval). Make clear which confounders were adjusted for and why they were included – <b>page 19, table 2</b><br>(b) Report category boundaries when continuous variables were categorized – <b>N/A</b><br>(c) If relevant, consider translating estimates of relative risk into absolute risk for a meaningful time period – <b>N/A</b> |
| Other analyses           | 17  | Report other analyses done—eg analyses of subgroups and interactions, and sensitivity analyses – <b>No subgroup analysis, but categorization of clinical experience described on page 7, line 17-22</b>                                                                                                                                                                                                                                                           |
| <b>Discussion</b>        |     |                                                                                                                                                                                                                                                                                                                                                                                                                                                                   |
| Key results              | 18  | Summarise key results with reference to study objectives - <b>page 10, line 16-21</b>                                                                                                                                                                                                                                                                                                                                                                             |
| Limitations              | 19  | Discuss limitations of the study, taking into account sources of potential bias or imprecision. Discuss both direction and magnitude of any potential bias – <b>page 11, line 20</b>                                                                                                                                                                                                                                                                              |
| Interpretation           | 20  | Give a cautious overall interpretation of results considering objectives, limitations, multiplicity of analyses, results from similar studies, and other relevant evidence <b>page 12, line 4</b>                                                                                                                                                                                                                                                                 |
| Generalisability         | 21  | Discuss the generalisability (external validity) of the study results <b>page 12, line 12</b>                                                                                                                                                                                                                                                                                                                                                                     |
| <b>Other information</b> |     |                                                                                                                                                                                                                                                                                                                                                                                                                                                                   |
| Funding                  | 22  | Give the source of funding and the role of the funders for the present study and, if applicable, for the original study on which the present article is based – <b>page 14, line 14</b>                                                                                                                                                                                                                                                                           |

\*Give information separately for exposed and unexposed groups.

**Note:** An Explanation and Elaboration article discusses each checklist item and gives methodological background and published examples of transparent reporting. The STROBE checklist is best used in conjunction with this article (freely available on the Web sites of PLoS Medicine at <http://www.plosmedicine.org/>, Annals of Internal Medicine at <http://www.annals.org/>, and Epidemiology at <http://www.epidem.com/>). Information on the STROBE Initiative is available at [www.strobe-statement.org](http://www.strobe-statement.org).
