# Supplementary material for: Support for mobilising medical students to join the COVID-19 pandemic emergency healthcare workforce: a cross-sectional questionnaire survey
Source: PubMed Central journal article supplement — BMJ Open. 2020 Sep 16;10(9):e039082. doi: 10.1136/bmjopen-2020-039082 (PMC7496568; doi:10.1136/bmjopen-2020-039082), 2020-09-16
Supplement: bmjopen-2020-039082supp001.pdf [file bmjopen-2020-039082supp001.pdf]

## Questionnaire English:

| #  | Question:                                                                                                                                                                                                                                                       | Response:                                                                                                                                                                                                                                                                                                                                                 |
|----|-----------------------------------------------------------------------------------------------------------------------------------------------------------------------------------------------------------------------------------------------------------------|-----------------------------------------------------------------------------------------------------------------------------------------------------------------------------------------------------------------------------------------------------------------------------------------------------------------------------------------------------------|
| 1  | Please provide your age in whole years.                                                                                                                                                                                                                         | Individual response in whole numbers.                                                                                                                                                                                                                                                                                                                     |
| 2  | Which gender do you identify yourself with the most?                                                                                                                                                                                                            | <ol style="list-style-type: none"> <li>1. Male.</li> <li>2. Female.</li> <li>3. Others.</li> </ol>                                                                                                                                                                                                                                                        |
| 3  | <p>How many semesters have you completed?</p> <p>This includes both semesters completed in the Bachelor and Masters programme in medicine.</p>                                                                                                                  | <ol style="list-style-type: none"> <li>1. 1 semester.</li> <li>2. 2 semesters.</li> <li>3. 3 semesters.</li> <li>4. 4 semesters.</li> <li>5. 5 semesters.</li> <li>6. 6 semesters.</li> <li>7. 7 semesters.</li> <li>8. 8 semesters.</li> <li>9. 9 semesters.</li> <li>10. 10 semesters.</li> <li>11. 11 semesters.</li> <li>12. 12 semesters.</li> </ol> |
| 4  | <p>Aside from your university studies, how many full months of clinical experience have you gained currently?</p> <p>This includes both experiences gained as a substitute assistant nurse, ventilator assistant, locum physician, phlebotomist, or others.</p> | Individual response in full months provided as a whole number in a textbox.                                                                                                                                                                                                                                                                               |
| 5  | What is your clinical experience based upon? (please select one or more of the following answers)                                                                                                                                                               | <ol style="list-style-type: none"> <li>1. Substitute assistant nurse</li> <li>2. Ventilator assistant</li> <li>3. Locum physician</li> <li>4. Phlebotomist</li> <li>5. Others.</li> <li>6. Not relevant</li> </ol>                                                                                                                                        |
| 5a | If you selected "Others" in Question 5, what are your clinical experiences based on?                                                                                                                                                                            | Individual text response.                                                                                                                                                                                                                                                                                                                                 |
| 6  | to what degree are the following statements important for you to join a national emergency preparedness workforce?                                                                                                                                              |                                                                                                                                                                                                                                                                                                                                                           |

|           |                                                                                                                                                    |                                                                                                                                                                                            |
|-----------|----------------------------------------------------------------------------------------------------------------------------------------------------|--------------------------------------------------------------------------------------------------------------------------------------------------------------------------------------------|
| <b>6a</b> | - I would like to help my fellow human beings                                                                                                      | Visual Analog Scale: 0 = To a very low extent, 100 = To a very great extent                                                                                                                |
| <b>6b</b> | - It is expected from me                                                                                                                           | Visual Analog Scale: 0 = To a very low extent, 100 = To a very great extent                                                                                                                |
| <b>6c</b> | - I become a part of the doctoral fellowship                                                                                                       | Visual Analog Scale: 0 = To a very low extent, 100 = To a very great extent                                                                                                                |
| <b>6d</b> | - I develop my professional job profile                                                                                                            | Visual Analog Scale: 0 = To a very low extent, 100 = To a very great extent                                                                                                                |
| <b>6e</b> | - Precautions have been taken to prevent me from getting infected during work                                                                      | Visual Analog Scale: 0 = To a very low extent, 100 = To a very great extent                                                                                                                |
| <b>6f</b> | - I will receive supervision in my work                                                                                                            | Visual Analog Scale: 0 = To a very low extent, 100 = To a very great extent                                                                                                                |
| <b>6g</b> | - I get paid for my work.                                                                                                                          | Visual Analog Scale: 0 = To a very low extent, 100 = To a very great extent                                                                                                                |
| <b>6h</b> | - I will be provided an opportunity to learn something                                                                                             | Visual Analog Scale: 0 = To a very low extent, 100 = To a very great extent                                                                                                                |
| <b>6i</b> | - I become part of a historic event                                                                                                                | Visual Analog Scale: 0 = To a very low extent, 100 = To a very great extent                                                                                                                |
| <b>6j</b> | - I am informed that I am needed                                                                                                                   | Visual Analog Scale: 0 = To a very low extent, 100 = To a very great extent                                                                                                                |
| <b>6k</b> | - I will take pride in contributing                                                                                                                | Visual Analog Scale: 0 = To a very low extent, 100 = To a very great extent                                                                                                                |
| <b>7</b>  | Do you have further causes for motivation that have not been addressed?                                                                            | Individual response.                                                                                                                                                                       |
| <b>8</b>  | In terms of joining a national emergency preparedness against a pandemic, how would you weigh inclination over obligation to join?                 | Visual Analog Scale: 0 = Inclination to join, 100 = Obligation to join.                                                                                                                    |
| <b>9</b>  | In terms of possibly joining a national emergency preparedness against a pandemic, which of the following statements best describes your decision? | <ol style="list-style-type: none"> <li>1. Have joined.</li> <li>2. I want to join.</li> <li>3. I am considering to join.</li> <li>4. I will not join.</li> <li>5. I do not know</li> </ol> |

## Questionnaire Danish:

| #  | Question:                                                                                                                                                                                            | Response:                                                                                                                                                                                                                  |
|----|------------------------------------------------------------------------------------------------------------------------------------------------------------------------------------------------------|----------------------------------------------------------------------------------------------------------------------------------------------------------------------------------------------------------------------------|
| 1  | Indtast din alder i fulde år.                                                                                                                                                                        | Individuelt respons I hele tal                                                                                                                                                                                             |
| 2  | Hvilket køn kan du bedst identificere dig med?                                                                                                                                                       | 1. Mand.<br>2. Kvinde.<br>3. Andet.                                                                                                                                                                                        |
| 3  | Hvor mange fulde semestre har du gennemført (dvs. både bachelor- og kandidatsemestre)?                                                                                                               | 1. 1 semestre.<br>2. 2 semestre.<br>3. 3 semestre.<br>4. 4 semestre.<br>5. 5 semestre.<br>6. 6 semestre.<br>7. 7 semestre.<br>8. 8 semestre.<br>9. 9 semestre.<br>10. 10 semestre.<br>11. 11 semestre.<br>12. 12 semestre. |
| 4  | Hvor mange fulde måneders klinisk erfaring ved siden af medicinstudiet har du på nuværende tidspunkt? - Dette både som FADL-sygeplejevikar (SPV), FADL-ventilatør, lægevikar, 'stikker' eller andet. | Individuel angivelse af antal måneder som tal i tekstboks                                                                                                                                                                  |
| 5  | Hvad er din kliniske erfaring baseret på? (Vælg venligst en eller flere af nedenstående svarmuligheder)                                                                                              | 1. FADL sygeplejevikar (SPV)<br>2. FADL ventilatør<br>3. Lægevikar<br>4. 'Stikker'<br>5. Andet<br>6. Ikke relevant                                                                                                         |
| 5a | Hvis du valgte andet i spørgsmål 5: Hvad er din kliniske erfaring ellers baseret på?                                                                                                                 | Individuelt respons I tekstboks                                                                                                                                                                                            |
| 6  | I hvilken grad er følgende udsagn vigtige for, at du melder dig til at indgå i et nationalt pandemiberedskab?                                                                                        |                                                                                                                                                                                                                            |
| 6a | - Jeg vil gerne hjælpe mine medmennesker.                                                                                                                                                            | Visuel analog skala: 0 = I meget lav grad, 100 = I meget høj grad                                                                                                                                                          |
| 6b | - Det forventes af mig                                                                                                                                                                               | Visuel analog skala: 0 = I meget lav grad, 100 = I meget høj grad                                                                                                                                                          |

|           |                                                                                                           |                                                                                                                                                                                                        |
|-----------|-----------------------------------------------------------------------------------------------------------|--------------------------------------------------------------------------------------------------------------------------------------------------------------------------------------------------------|
| <b>6c</b> | - Jeg bliver en del af det lægelige fællesskab.                                                           | Visuel analog skala: 0 = I meget lav grad, 100 = I meget høj grad                                                                                                                                      |
| <b>6d</b> | - Jeg får udbygget min faglige jobprofil                                                                  | Visuel analog skala: 0 = I meget lav grad, 100 = I meget høj grad                                                                                                                                      |
| <b>6e</b> | - Der er taget forholdsregler, så jeg ikke bliver smittet under arbejdet.                                 | Visuel analog skala: 0 = I meget lav grad, 100 = I meget høj grad                                                                                                                                      |
| <b>6f</b> | - Jeg vil modtage supervision i mit arbejde                                                               | Visuel analog skala: 0 = I meget lav grad, 100 = I meget høj grad                                                                                                                                      |
| <b>6g</b> | - Jeg får løn for arbejdet                                                                                | Visuel analog skala: 0 = I meget lav grad, 100 = I meget høj grad                                                                                                                                      |
| <b>6h</b> | - Jeg får mulighed for at lære noget                                                                      | Visuel analog skala: 0 = I meget lav grad, 100 = I meget høj grad                                                                                                                                      |
| <b>6i</b> | - Jeg bliver en del af en historisk begivenhed.                                                           | Visuel analog skala: 0 = I meget lav grad, 100 = I meget høj grad                                                                                                                                      |
| <b>6j</b> | - Jeg får at vide, at der er brug for mig                                                                 | Visuel analog skala: 0 = I meget lav grad, 100 = I meget høj grad                                                                                                                                      |
| <b>6k</b> | - Jeg bliver stolt over at bidrage                                                                        | Visuel analog skala: 0 = I meget lav grad, 100 = I meget høj grad                                                                                                                                      |
| <b>7</b>  | Har du yderligere årsager, der motiverer dig, som ikke er spurgt ind til?                                 | Individuelt respons I tekstboks.                                                                                                                                                                       |
| <b>8</b>  | Hvordan ville du vægte lyst og pligt ift. at indgå i et pandemiberedskab?                                 | Visuel analog skala: 0 = Lyst, 100 = pligt.                                                                                                                                                            |
| <b>9</b>  | Hvilke af nedenstående udsagn beskriver bedst din stillingtagen til evt. deltagelse i pandemiberedskabet? | <ol style="list-style-type: none"> <li>1. Jeg har meldt mig</li> <li>2. Jeg ønsker at melde mig</li> <li>3. Jeg overvejer at melde mig</li> <li>4. Jeg melder mig ikke</li> <li>5. Ved ikke</li> </ol> |
